# Supplementary material
Source: PubMed Central journal article supplement (PMC7320614)

# Supporting Information

## Table of Content

### Supporting Tables

- Table S1.** Energy weights for FASPR energy terms.
- Table S2.** The atomic parameters of 18 atom types defined in FASPR.
- Table S3.** Amino acid hydrogen bonding donor and acceptor atoms.
- Table S4.** Hemisphere radii for 20 amino acids.
- Table S5.** PDB IDs of 100 training proteins.
- Table S6.** PDB IDs of 379 test proteins.
- Table S7.** The values of TM-score and RMSD between the 379 I-TASSER models and their native counterparts.
- Table S8.** The lower bounds, upper bounds and increments for optimizing parameters.
- Table S9.** Protein side-chain packing results for 18 amino acid types in terms of  $\chi_{1-4}$  accuracy on 379 native backbones for the residues in three categories.
- Table S10.** The computational time for side-chain modeling on 379 native main chains.
- Table S11.** Protein side-chain packing results for 18 amino acid types in terms of  $\chi_{1-4}$  accuracy on 379 I-TASSER modeled backbones for the residues in three categories.
- Table S12.** Protein side-chain packing results for 18 amino acid types in terms of  $\chi_{1-4}$  accuracy on 379 perturbed backbones (RMSD = 0.21 Å) for the residues in three categories.
- Table S13.** Protein side-chain packing results for 18 amino acid types in terms of  $\chi_{1-4}$  accuracy on 379 perturbed backbones (RMSD = 0.57 Å) for the residues in three categories.
- Table S14.** Protein side-chain packing results for 18 amino acid types in terms of  $\chi_{1-4}$  accuracy on 379 perturbed backbones (RMSD = 0.93 Å) for the residues in three categories.
- Table S15.** Protein side-chain packing results for 18 amino acid types in terms of  $\chi_{1-4}$  accuracy on 379 perturbed backbones (RMSD = 1.48 Å) for the residues in three categories.
- Table S16.** Protein side-chain packing results for 18 amino acid types in terms of  $\chi_{1-4}$  accuracy on 379 perturbed backbones (RMSD = 1.88 Å) for the residues in three categories.
- Table S17.** Protein side-chain packing results for 18 amino acid types in terms of  $\chi_{1-4}$  accuracy on 379 perturbed backbones (RMSD = 2.38 Å) for the residues in three categories.
- Table S18.** Protein side-chain packing results for 18 amino acid types in terms of  $\chi_{1-4}$  accuracy on 379 perturbed backbones (RMSD = 2.55 Å) for the residues in three categories.

**Table S19.** Protein side-chain packing results for 18 amino acid types in terms of  $\chi_{1-4}$  accuracy on 379 perturbed backbones (RMSD = 2.74 Å) for the residues in three categories.

**Table S20.** Protein side-chain packing results for 18 amino acid types in terms of  $\chi_{1-4}$  accuracy on 379 perturbed backbones (RMSD = 2.95 Å) for the residues in three categories.

**Table S21.** Protein side-chain packing results for 18 amino acid types in terms of  $\chi_{1-4}$  accuracy on 379 perturbed backbones (RMSD = 3.68 Å) for the residues in three categories.

**Table S22.** The total number of clashes in the repacked structures based on perturbed backbones.

**Table S23.** The number and the ratio of rotamers eliminated in different searching steps.

### Supporting Tables

**Figure S1.** FASPR computational time (in seconds) for side-chain packing as a function of number of rotamers (A) or number of residues (B).

**Figure S2.** The accuracy of FASPR in terms of  $\chi_{1-4}$  recovery rate (A) or RMSD (B) as a function of number of residues.

## Supporting Tables

**Table S1.** Energy weights for FASPR energy terms.

| Name           | Value |
|----------------|-------|
| $w_{hb}$       | 1     |
| $w_{ss}$       | 6     |
| $w_{rot}(ALA)$ | 0     |
| $w_{rot}(CYS)$ | 5.5   |
| $w_{rot}(ASP)$ | 2     |
| $w_{rot}(GLU)$ | 1     |
| $w_{rot}(PHE)$ | 1.5   |
| $w_{rot}(GLY)$ | 0     |
| $w_{rot}(HIS)$ | 3     |
| $w_{rot}(ILE)$ | 1     |
| $w_{rot}(LYS)$ | 2     |
| $w_{rot}(LEU)$ | 2     |
| $w_{rot}(MET)$ | 1.5   |
| $w_{rot}(ASN)$ | 2     |
| $w_{rot}(PRO)$ | 1.5   |
| $w_{rot}(GLN)$ | 2.5   |
| $w_{rot}(ARG)$ | 1.5   |
| $w_{rot}(SER)$ | 1.5   |
| $w_{rot}(THR)$ | 2     |
| $w_{rot}(VAL)$ | 2     |
| $w_{rot}(TRP)$ | 3.5   |
| $w_{rot}(TYR)$ | 1.5   |

**Table S2.** The atomic parameters of 18 atom types defined in FASPR.

| Atom types                  | Radius ( $\sigma$ ) | Well-depth ( $\epsilon$ ) |
|-----------------------------|---------------------|---------------------------|
| Main-chain CA               | 1.78                | 0.25                      |
| Main-chain C                | 1.40                | 0.14                      |
| CH1                         | 2.30                | 0.30                      |
| CH2                         | 1.91                | 0.37                      |
| CH3                         | 1.96                | 0.48                      |
| Aromatic C                  | 1.73                | 0.38                      |
| Side-chain CO, COO,HCNN     | 1.43                | 0.07                      |
| Cys CB                      | 1.99                | 0.38                      |
| Main-chain N                | 1.42                | 0.08                      |
| Side-chain -NH-, -NH2, -NH3 | 1.69                | 0.24                      |
| His NE2                     | 1.56                | 0.46                      |
| Pro N                       | 1.70                | 0.48                      |
| Main-chain O                | 1.48                | 0.22                      |
| OC                          | 1.44                | 0.27                      |
| OOC                         | 1.40                | 0.07                      |
| OH                          | 1.43                | 0.12                      |
| Cys S                       | 2.15                | 0.44                      |
| Met S                       | 1.74                | 0.40                      |

**Table S3.** Amino acid hydrogen bonding donor and acceptor atoms.

| Donor ( <i>D</i> ) | Donor base ( <i>DB</i> ) | Acceptor ( <i>A</i> ) | Acceptor base ( <i>AB</i> ) |
|--------------------|--------------------------|-----------------------|-----------------------------|
| Backbone N         | Backbone CA              | Backbone O            | Backbone C                  |
| His ND1            | His CG                   | Asp OD1/OD2           | Asp CG                      |
| Lys NZ             | Lys CE                   | Glu OE1/OE2           | Glu CD                      |
| Asn ND2            | Asn CG                   | His NE2               | His CD2                     |
| Gln NE2            | Gln CD                   | Asn OD1               | Asn CG                      |
| Arg NE             | Arg CD                   | Gln OE1               | Gln CD                      |
| Arg NH1/NH2        | Arg CZ                   | Ser OG                | Ser CB                      |
| Ser OG             | Ser CB                   | Thr OG1               | Thr CB                      |
| Thr OG1            | Thr CB                   | Tyr OH                | Tyr CZ                      |
| Trp NE1            | Trp CD1                  |                       |                             |
| Tyr OH             | Tyr CZ                   |                       |                             |

**Table S4.** Hemisphere radii for 20 amino acids.

| Amino acid | Radius of hemisphere (Å) |
|------------|--------------------------|
| ALA        | 3.2                      |
| CYS        | 3.2                      |
| ASP        | 3.2                      |
| GLU        | 3.7                      |
| PHE        | 4.3                      |
| GLY        | 2.4                      |
| HIS        | 3.7                      |
| ILE        | 3.2                      |
| LYS        | 5.0                      |
| MET        | 4.3                      |
| ASN        | 3.2                      |
| PRO        | 3.2                      |
| GLN        | 3.7                      |
| ARG        | 6.2                      |
| SER        | 3.2                      |
| THR        | 3.2                      |
| VAL        | 3.2                      |
| TRP        | 5.3                      |
| TYR        | 5.7                      |

**Table S5.** PDB IDs of 100 training proteins.

---

135L, 1A8Q, 1AGY, 1BJ7, 1BK7, 1BKR, 1BN6, 1C44, 1C5H, 1CHD, 1EDG, 1EW4, 1EYH, 1F32, 1G9O, 1GQZ, 1GYV, 1H75, 1HD5, 1I2H, 1I2T, 1IUK, 1JOS, 1JYH, 1K6A, 1KF5, 1KHI, 1KNG, 1KXO, 1L6P, 1LMI, 1LN4, 1LPL, 1LZL, 1MHN, 1NOA, 1O9Z, 1OA4, 1OI7, 1OMP, 1OW1, 1P3C, 1P7S, 1PGS, 1Q2U, 1Q42, 1Q5Z, 1QAD, 1QK8, 1QWK, 1R26, 1R62, 1R9W, 1RYN, 1SNO, 1T2I, 1T3Y, 1TG0, 1TSF, 1U53, 1UAI, 1UCH, 1UCS, 1UGN, 1UJ8, 1UOY, 1WLY, 1WPA, 1X6Q, 1X91, 1XAK, 1XTE, 1Y9U, 1YCK, 1YP5, 1YRW, 1Z3Y, 1ZD8, 1ZEQ, 1ZHV, 1ZPW, 1ZZK, 2A4V, 2AHE, 2AWG, 2B29, 2B49, 2BV9, 2ERF, 2ESK, 2FI9, 2FK9, 2FQ3, 2FR2, 2HVM, 2IGD, 2LIS, 2OVO, 3EZM, 4PTI

---

**Table S6.** PDB IDs of 379 test proteins.

---

1AHO, 1ATZ, 1B2P, 1B8Z, 1B9W, 1BGF, 1BYI, 1C02, 1C48, 1CEI, 1DPT, 1DQ0, 1DV7, 1DYS, 1E5M, 1E6F, 1EDQ, 1ELK, 1ERZ, 1ES5, 1ES9, 1F41, 1F60, 1F94, 1FCQ, 1FO9, 1FPO, 1FTR, 1FVK, 1G61, 1G8A, 1G8Q, 1GMU, 1GO3, 1GPP, 1GQN, 1GS9, 1GSO, 1GVP, 1GXN, 1H03, 1H4A, 1H4Y, 1HCL, 1HM5, 1HZ6, 1HZ9, 1I4J, 1IGQ, 1IJQ, 1IJY, 1ILK, 1IU8, 1J23, 1J2A, 1J7G, 1JB3, 1JCD, 1JKS, 1JY2, 1K33, 1KMT, 1KMZ, 1KN3, 1KOE, 1KPT, 1KU8, 1KVA, 1KVE, 1KYF, 1KZQ, 1L3K, 1LBV, 1LM5, 1LTU, 1M5T, 1M6J, 1MD6, 1MF7, 1MG7, 1MIX, 1MKK, 1MML, 1MOL, 1N1J, 1N93, 1NAR, 1NM8, 1NWA, 1NXM, 1OAI, 1OAQ, 1OGM, 1OK7, 1P1X, 1P9H, 1PCF, 1PDO, 1PE9, 1PGV, 1PM4, 1PXZ, 1QAH, 1QKD, 1R12, 1R29, 1R77, 1R8N, 1RFY, 1RGX, 1RL0, 1RWZ, 1RYL, 1RZ2, 1S7I, 1S7K, 1SAU, 1SH8, 1SMX, 1SNT, 1SQE, 1SRV, 1SUU, 1SWH, 1T1J, 1TJE, 1TKS, 1TP6, 1TUA, 1TUO, 1TY0, 1TZV, 1U07, 1U2H, 1U5X, 1UEB, 1UEK, 1UJN, 1UKF, 1ULN, 1ULR, 1UNP, 1USM, 1UXZ, 1UZ3, 1V05, 1V0S, 1V6T, 1V7Q, 1V8E, 1V8H, 1V8I, 1VDK, 1VE2, 1VGT, 1VH5, 1VJS, 1VPI, 1W5R, 1W7B, 1WBA, 1WD7, 1WKA, 1WKO, 1WLG, 1WLZ, 1WM3, 1WMH, 1WQJ, 1WTJ, 1WU9, 1WVH, 1WYC, 1WZ3, 1X1E, 1X2I, 1X6I, 1XDZ, 1XFK, 1XS0, 1XXO, 1Y2T, 1Y7Y, 1YAC, 1YHH, 1YN3, 1YPF, 1YT4, 1YTL, 1YU5, 1YW5, 1YXY, 1YZM, 1Z0C, 1Z0P, 1ZKR, 1ZO2, 1ZRS, 1ZUH, 1ZV1, 1ZVA, 1ZVT, 1ZXT, 2A35, 2A6W, 2A8F, 2AHF, 2AHN, 2B0A, 2B0J, 2B2F, 2BAY, 2BK8, 2BPD, 2BVP, 2CG7, 2CGH, 2CHC, 2CI3, 2CIU, 2COV, 2CWC, 2CWK, 2CWL, 2CWR, 2CYG, 2D4P, 2D68, 2D8E, 2DQW, 2DYU, 2E01, 2E10, 2E3Z, 2E64, 2E7A, 2E8F, 2E8G, 2E9Y, 2EBB, 2EBE, 2ECR, 2EGJ, 2EHG, 2EPI, 2ETX, 2EX0, 2F23, 2F5G, 2F6L, 2FBN, 2FBQ, 2FD5, 2FHZ, 2FJZ, 2FL4, 2FLU, 2FRG, 2FVH, 2FW7, 2G2U, 2G30, 2G40, 2G69, 2G7I, 2G7O, 2GAS, 2GDQ, 2GEC, 2GGV, 2GIY, 2GKG, 2GKV, 2GOM, 2GQV, 2GXG, 2H14, 2H2R, 2H2Z, 2H7W, 2H7Z, 2H8E, 2H8O, 2HC8, 2HLR, 2HLY, 2HOQ, 2HPL, 2HWW, 2HY5, 2HZF, 2I3F, 2I49, 2I5D, 2I6V, 2IBL, 2IC6, 2IC7, 2IIA, 2IJK, 2IP2, 2IPR, 2IRU, 2IUM, 2IXM, 2IY9, 2IZ6, 2J2J, 2J5Y, 2J6B, 2J71, 2J8B, 2J9W, 2JCP, 2NML, 2NNU, 2NPT, 2NRR, 2NV0, 2O0Q, 2O2K, 2O6S, 2O6X, 2OEB, 2OHW, 2OIX, 2OL7, 2OSA, 2OTU, 2P1G, 2P38, 2P4H, 2P52, 2P5D, 2P5K, 2P65, 2P84, 2PBP, 2PBQ, 2PEF, 2PET, 2PGE, 2PKF, 2PMR, 2PND, 2PST, 2PTV, 2PV2, 2Q8O, 2QIY, 2QOL, 2QPW, 2QR3, 2QT4, 2R6U, 2R77, 2R99, 2RCZ, 2RFA, 2RIK, 2RJD, 2RK5, 2VC8, 2YXF, 2YYV, 2YZ1, 2Z14, 2Z1E, 2Z37, 2ZFY, 3ADO, 3BB7, 3BN6, 3C4S, 3PHS, 3SSW, 4RWU, 5WOF, 6XIA

---



**Table S7.** The values of TM-score and RMSD between the 379 I-TASSER models and their native counterparts.

| PDB ID | TM-score | RMSD (Å) | PDB ID | TM-score | RMSD (Å) |
|--------|----------|----------|--------|----------|----------|
| 1AHO   | 0.9151   | 1.257    | 1YW5   | 0.9962   | 0.309    |
| 1ATZ   | 0.9603   | 1.276    | 1YXY   | 0.9972   | 0.300    |
| 1B2P   | 0.9936   | 0.329    | 1YZM   | 0.9435   | 0.697    |
| 1B8Z   | 0.9771   | 0.468    | 1Z0C   | 0.9876   | 0.616    |
| 1B9W   | 0.9786   | 0.550    | 1Z0P   | 0.9463   | 1.422    |
| 1BGF   | 0.9866   | 0.487    | 1ZKR   | 0.9937   | 0.551    |
| 1BYI   | 0.9907   | 0.611    | 1ZO2   | 0.9877   | 0.465    |
| 1C02   | 0.9866   | 0.687    | 1ZRS   | 0.9830   | 1.531    |
| 1C48   | 0.9899   | 0.298    | 1ZUH   | 0.9391   | 2.209    |
| 1CEI   | 0.8867   | 1.714    | 1ZV1   | 0.9429   | 0.653    |
| 1DPT   | 0.9932   | 0.333    | 1ZVA   | 0.8891   | 1.950    |
| 1DQ0   | 0.9961   | 0.362    | 1ZVT   | 0.9480   | 1.649    |
| 1DV7   | 0.9256   | 2.952    | 1ZXT   | 0.9318   | 0.952    |
| 1DYS   | 0.9970   | 0.375    | 2A35   | 0.9793   | 1.155    |
| 1E5M   | 0.9930   | 0.619    | 2A6W   | 0.9850   | 0.740    |
| 1E6F   | 0.9487   | 1.260    | 2A8F   | 0.9795   | 0.532    |
| 1EDQ   | 0.9964   | 0.498    | 2AHF   | 0.9978   | 0.329    |
| 1ELK   | 0.9975   | 0.232    | 2AHN   | 0.9970   | 0.305    |
| 1ERZ   | 0.9948   | 0.468    | 2B0A   | 0.9984   | 0.203    |
| 1ES5   | 0.9954   | 0.414    | 2B0J   | 0.8053   | 3.599    |
| 1ES9   | 0.9978   | 0.252    | 2B2F   | 0.9989   | 0.233    |
| 1F41   | 0.9793   | 0.756    | 2BAY   | 0.9003   | 1.091    |
| 1F60   | 0.9989   | 0.247    | 2BK8   | 0.8415   | 2.339    |
| 1F94   | 0.8957   | 1.061    | 2BPD   | 0.9491   | 1.210    |
| 1FCQ   | 0.9899   | 0.667    | 2BVP   | 0.9768   | 0.948    |
| 1FO9   | 0.9956   | 0.565    | 2CG7   | 0.9693   | 0.620    |
| 1FPO   | 0.9975   | 0.244    | 2CGH   | 0.9647   | 1.480    |
| 1FTR   | 0.9968   | 0.362    | 2CHC   | 0.9970   | 0.269    |
| 1FVK   | 0.9898   | 0.524    | 2CI3   | 0.9922   | 0.573    |
| 1G61   | 0.9974   | 0.286    | 2CIU   | 0.9898   | 0.425    |
| 1G8A   | 0.9703   | 1.204    | 2COV   | 0.9952   | 0.242    |
| 1G8Q   | 0.8745   | 2.021    | 2CWC   | 0.9941   | 0.655    |
| 1GMU   | 0.9611   | 0.901    | 2CWK   | 0.9891   | 0.491    |
| 1GO3   | 0.9870   | 0.689    | 2CWL   | 0.9862   | 0.879    |
| 1GPP   | 0.9633   | 1.199    | 2CWR   | 0.9394   | 0.986    |
| 1GQN   | 0.9775   | 1.311    | 2CYG   | 0.9964   | 0.390    |
| 1GS9   | 0.9566   | 1.202    | 2D4P   | 0.9787   | 0.644    |
| 1GSO   | 0.9773   | 1.194    | 2D68   | 0.9575   | 0.717    |
| 1GVP   | 0.9787   | 0.507    | 2D8E   | 0.9839   | 0.440    |
| 1GXN   | 0.9966   | 0.383    | 2DQW   | 0.9858   | 0.886    |
| 1H03   | 0.8604   | 1.762    | 2DYU   | 0.9976   | 0.329    |
| 1H4A   | 0.9889   | 0.539    | 2E01   | 0.9609   | 3.772    |

|      |        |        |      |        |       |
|------|--------|--------|------|--------|-------|
| 1H4Y | 0.9813 | 0.623  | 2E10 | 0.9602 | 2.648 |
| 1HCL | 0.8786 | 4.642  | 2E3Z | 0.9930 | 0.674 |
| 1HM5 | 0.9956 | 0.560  | 2E64 | 0.9930 | 0.496 |
| 1HZ6 | 0.9228 | 1.327  | 2E7A | 0.9687 | 0.938 |
| 1HZ9 | 0.9752 | 0.476  | 2E8F | 0.9974 | 0.218 |
| 1I4J | 0.7650 | 3.512  | 2E8G | 0.9991 | 0.172 |
| 1IGQ | 0.9268 | 1.103  | 2E9Y | 0.9963 | 0.395 |
| 1IJQ | 0.9801 | 0.981  | 2EBB | 0.9851 | 0.442 |
| 1IJY | 0.9943 | 0.312  | 2EBE | 0.9463 | 1.035 |
| 1ILK | 0.6074 | 14.385 | 2ECR | 0.9840 | 0.735 |
| 1IU8 | 0.9959 | 0.342  | 2EGJ | 0.9736 | 0.699 |
| 1J23 | 0.9966 | 0.248  | 2EHG | 0.9976 | 0.225 |
| 1J2A | 0.9400 | 1.839  | 2EPI | 0.9696 | 1.294 |
| 1J7G | 0.9933 | 0.367  | 2ETX | 0.9877 | 0.588 |
| 1JB3 | 0.9828 | 0.640  | 2EX0 | 0.9869 | 0.845 |
| 1JCD | 0.6822 | 1.931  | 2F23 | 0.9255 | 1.645 |
| 1JKS | 0.9537 | 5.268  | 2F5G | 0.9521 | 1.131 |
| 1JY2 | 0.6986 | 3.902  | 2F6L | 0.9957 | 0.319 |
| 1K33 | 0.4746 | 4.666  | 2FBN | 0.9974 | 0.237 |
| 1KMT | 0.9474 | 1.109  | 2FBQ | 0.9980 | 0.247 |
| 1KMZ | 0.5162 | 12.617 | 2FD5 | 0.9983 | 0.209 |
| 1KN3 | 0.9898 | 0.626  | 2FHZ | 0.9952 | 0.264 |
| 1KOE | 0.9944 | 0.371  | 2FJZ | 0.9277 | 0.976 |
| 1KPT | 0.9975 | 0.188  | 2FL4 | 0.9940 | 0.352 |
| 1KU8 | 0.9907 | 0.419  | 2FLU | 0.9927 | 0.580 |
| 1KVA | 0.9597 | 1.110  | 2FRG | 0.9115 | 1.375 |
| 1KVE | 0.9086 | 1.203  | 2FVH | 0.9689 | 0.684 |
| 1KYF | 0.9943 | 0.445  | 2FW7 | 0.9805 | 0.795 |
| 1KZQ | 0.9983 | 0.240  | 2G2U | 0.9915 | 0.578 |
| 1L3K | 0.9591 | 1.068  | 2G30 | 0.9947 | 0.420 |
| 1LBV | 0.9847 | 0.779  | 2G40 | 0.9823 | 1.332 |
| 1LM5 | 0.9676 | 0.959  | 2G69 | 0.9400 | 1.126 |
| 1LTU | 0.9980 | 0.275  | 2G7I | 0.9309 | 1.146 |
| 1M5T | 0.9722 | 0.716  | 2G7O | 0.9670 | 0.541 |
| 1M6J | 0.9986 | 0.219  | 2GAS | 0.9934 | 0.535 |
| 1MD6 | 0.9915 | 0.432  | 2GDQ | 0.9879 | 0.811 |
| 1MF7 | 0.9838 | 1.118  | 2GEC | 0.9354 | 2.176 |
| 1MG7 | 0.9976 | 0.379  | 2GGV | 0.5946 | 3.155 |
| 1MIX | 0.9347 | 4.645  | 2GIY | 0.9949 | 0.358 |
| 1MKK | 0.8830 | 1.846  | 2GKG | 0.9657 | 0.818 |
| 1MML | 0.9374 | 2.225  | 2GKV | 0.9924 | 0.455 |
| 1MOL | 0.9682 | 0.737  | 2GOM | 0.9798 | 0.385 |
| 1NIJ | 0.9855 | 0.412  | 2GQV | 0.9489 | 0.713 |
| 1N93 | 0.9944 | 0.735  | 2GXG | 0.8677 | 1.982 |
| 1NAR | 0.9980 | 0.284  | 2H14 | 0.9926 | 0.554 |

|      |        |       |      |        |       |
|------|--------|-------|------|--------|-------|
| 1NM8 | 0.9889 | 0.997 | 2H2R | 0.8127 | 3.792 |
| 1NWA | 0.9968 | 0.276 | 2H2Z | 0.9798 | 1.289 |
| 1NXM | 0.9800 | 0.946 | 2H7W | 0.9806 | 0.572 |
| 1OAI | 0.7616 | 2.528 | 2H7Z | 0.9372 | 1.016 |
| 1OAQ | 0.9692 | 0.815 | 2H8E | 0.9954 | 0.277 |
| 1OGM | 0.9992 | 0.238 | 2H8O | 0.9942 | 0.624 |
| 1OK7 | 0.9916 | 0.655 | 2HC8 | 0.9732 | 0.834 |
| 1P1X | 0.9982 | 0.247 | 2HLR | 0.7555 | 2.861 |
| 1P9H | 0.9739 | 1.164 | 2HLY | 0.9950 | 0.416 |
| 1PCF | 0.9551 | 0.642 | 2HOQ | 0.9958 | 0.372 |
| 1PDO | 0.9932 | 0.351 | 2HPL | 0.7633 | 2.273 |
| 1PE9 | 0.9961 | 0.468 | 2HWW | 0.9536 | 1.409 |
| 1PGV | 0.9893 | 0.515 | 2HY5 | 0.9954 | 0.288 |
| 1PM4 | 0.7034 | 4.687 | 2HZF | 0.9520 | 1.162 |
| 1PXZ | 0.9991 | 0.204 | 2I3F | 0.9981 | 0.235 |
| 1QAH | 0.9749 | 0.719 | 2I49 | 0.9984 | 0.287 |
| 1QKD | 0.9500 | 0.705 | 2I5D | 0.9950 | 0.448 |
| 1R12 | 0.9973 | 0.304 | 2I6V | 0.8238 | 1.717 |
| 1R29 | 0.9645 | 0.861 | 2IBL | 0.6856 | 5.386 |
| 1R77 | 0.9458 | 1.314 | 2IC6 | 0.8484 | 1.474 |
| 1R8N | 0.9977 | 0.245 | 2IC7 | 0.9967 | 0.293 |
| 1RFY | 0.9001 | 1.272 | 2IIA | 0.9744 | 1.118 |
| 1RGX | 0.9597 | 0.750 | 2IJK | 0.9069 | 1.426 |
| 1RL0 | 0.9980 | 0.265 | 2IP2 | 0.9988 | 0.230 |
| 1RWZ | 0.9882 | 0.663 | 2IPR | 0.9366 | 1.349 |
| 1RYL | 0.9871 | 0.712 | 2IRU | 0.9901 | 0.668 |
| 1RZ2 | 0.9248 | 2.529 | 2IUM | 0.9965 | 0.320 |
| 1S7I | 0.9963 | 0.251 | 2IXM | 0.9909 | 0.639 |
| 1S7K | 0.9523 | 1.672 | 2IY9 | 0.9985 | 0.261 |
| 1SAU | 0.9915 | 0.367 | 2IZ6 | 0.9759 | 0.895 |
| 1SH8 | 0.9953 | 0.318 | 2J2J | 0.9963 | 0.309 |
| 1SMX | 0.8982 | 1.873 | 2J5Y | 0.9788 | 0.395 |
| 1SNT | 0.9824 | 1.074 | 2J6B | 0.9940 | 0.299 |
| 1SQE | 0.8647 | 2.953 | 2J71 | 0.9866 | 0.465 |
| 1SRV | 0.9895 | 0.471 | 2J8B | 0.9169 | 1.377 |
| 1SUU | 0.9904 | 0.667 | 2J9W | 0.9935 | 0.315 |
| 1SWH | 0.7224 | 8.168 | 2JCP | 0.8155 | 2.639 |
| 1T1J | 0.9827 | 0.565 | 2NML | 0.8800 | 1.643 |
| 1TJE | 0.9828 | 0.761 | 2NNU | 0.9871 | 0.608 |
| 1TKS | 0.9719 | 1.287 | 2NPT | 0.8470 | 6.698 |
| 1TP6 | 0.9790 | 0.658 | 2NRR | 0.9344 | 2.082 |
| 1TUA | 0.9963 | 0.315 | 2NV0 | 0.9677 | 1.186 |
| 1TUO | 0.9953 | 0.727 | 2O0Q | 0.8821 | 1.837 |
| 1TY0 | 0.9964 | 0.324 | 2O2K | 0.9935 | 0.660 |
| 1TZV | 0.9786 | 0.720 | 2O6S | 0.9941 | 0.415 |

|      |        |        |      |        |        |
|------|--------|--------|------|--------|--------|
| 1U07 | 0.9658 | 0.723  | 2O6X | 0.9911 | 0.672  |
| 1U2H | 0.9919 | 0.324  | 2OEB | 0.9980 | 0.203  |
| 1U5X | 0.9733 | 0.839  | 2OHW | 0.9961 | 0.264  |
| 1UEB | 0.9933 | 0.423  | 2OIX | 0.9915 | 0.502  |
| 1UEK | 0.9986 | 0.230  | 2OL7 | 0.5037 | 22.763 |
| 1UJN | 0.9974 | 0.403  | 2OSA | 0.9778 | 0.987  |
| 1UKF | 0.9972 | 0.269  | 2OTU | 0.9686 | 0.951  |
| 1ULN | 0.8264 | 1.623  | 2P1G | 0.9877 | 0.719  |
| 1ULR | 0.9910 | 0.324  | 2P38 | 0.9966 | 0.271  |
| 1UNP | 0.9011 | 1.822  | 2P4H | 0.9926 | 0.910  |
| 1USM | 0.9445 | 1.177  | 2P52 | 0.9705 | 1.264  |
| 1UXZ | 0.9905 | 0.422  | 2P5D | 0.9742 | 0.876  |
| 1UZ3 | 0.8462 | 9.326  | 2P5K | 0.9432 | 0.794  |
| 1V05 | 0.9832 | 0.473  | 2P65 | 0.9707 | 0.928  |
| 1V0S | 0.9753 | 1.828  | 2P84 | 0.9926 | 0.388  |
| 1V6T | 0.9978 | 0.283  | 2PBP | 0.9849 | 0.746  |
| 1V7Q | 0.9845 | 0.625  | 2PBQ | 0.9917 | 0.483  |
| 1V8E | 0.9956 | 0.379  | 2PEF | 0.9081 | 7.248  |
| 1V8H | 0.9929 | 0.322  | 2PET | 0.9978 | 0.263  |
| 1V8I | 0.9755 | 0.988  | 2PGE | 0.9888 | 0.809  |
| 1VDK | 0.9964 | 0.471  | 2PKF | 0.9867 | 0.814  |
| 1VE2 | 0.9873 | 0.840  | 2PMR | 0.9918 | 0.288  |
| 1VGT | 0.9517 | 1.378  | 2PND | 0.9235 | 1.288  |
| 1VH5 | 0.9933 | 0.362  | 2PST | 0.9264 | 0.832  |
| 1VJS | 0.9832 | 1.864  | 2PTV | 0.9423 | 1.177  |
| 1VPI | 0.9467 | 1.029  | 2PV2 | 0.9844 | 0.476  |
| 1W5R | 0.9939 | 0.510  | 2Q8O | 0.9489 | 1.496  |
| 1W7B | 0.9916 | 0.691  | 2QIY | 0.9805 | 0.839  |
| 1WBA | 0.9929 | 0.414  | 2QOL | 0.9665 | 2.186  |
| 1WD7 | 0.9910 | 0.604  | 2QPW | 0.7638 | 6.193  |
| 1WKA | 0.9768 | 0.704  | 2QR3 | 0.8905 | 1.663  |
| 1WKO | 0.9966 | 0.281  | 2QT4 | 0.9828 | 0.482  |
| 1WLG | 0.9001 | 2.199  | 2R6U | 0.9577 | 1.954  |
| 1WLZ | 0.6017 | 3.892  | 2R77 | 0.8908 | 3.033  |
| 1WM3 | 0.9150 | 0.974  | 2R99 | 0.9956 | 0.319  |
| 1WMH | 0.9246 | 0.987  | 2RCZ | 0.6719 | 17.625 |
| 1WQJ | 0.9462 | 1.000  | 2RFA | 0.9958 | 0.359  |
| 1WTJ | 0.9875 | 0.769  | 2RIK | 0.8661 | 2.611  |
| 1WU9 | 0.9418 | 0.915  | 2RJD | 0.9826 | 1.241  |
| 1WVH | 0.9352 | 1.339  | 2RK5 | 0.9872 | 0.389  |
| 1WYC | 0.9910 | 0.759  | 2VC8 | 0.9748 | 0.489  |
| 1WZ3 | 0.5252 | 14.226 | 2YXF | 0.8779 | 3.079  |
| 1X1E | 0.9912 | 0.548  | 2YYV | 0.9970 | 0.307  |
| 1X2I | 0.9730 | 0.513  | 2YZ1 | 0.7111 | 7.582  |
| 1X6I | 0.9925 | 0.307  | 2Z14 | 0.9745 | 1.323  |

|      |        |       |      |        |       |
|------|--------|-------|------|--------|-------|
| 1XDZ | 0.9960 | 0.364 | 2Z1E | 0.9804 | 1.587 |
| 1XFK | 0.9996 | 0.136 | 2Z37 | 0.9936 | 0.478 |
| 1XS0 | 0.9810 | 0.727 | 2ZFY | 0.9967 | 0.325 |
| 1XXO | 0.9303 | 1.962 | 3ADO | 0.9968 | 0.364 |
| 1Y2T | 0.9948 | 0.323 | 3BB7 | 0.9981 | 0.314 |
| 1Y7Y | 0.9821 | 0.403 | 3BN6 | 0.9828 | 0.717 |
| 1YAC | 0.9980 | 0.237 | 3C4S | 0.9220 | 0.844 |
| 1YHH | 0.9913 | 0.565 | 3PHS | 0.9984 | 0.231 |
| 1YN3 | 0.9887 | 0.391 | 3SSW | 0.6000 | 4.822 |
| 1YPF | 0.9731 | 1.625 | 4RWU | 0.9915 | 0.301 |
| 1YT4 | 0.9967 | 0.346 | 5WOF | 0.7912 | 2.951 |
| 1YTL | 0.9979 | 0.214 | 6XIA | 0.9977 | 0.364 |
| 1YU5 | 0.9752 | 0.578 |      |        |       |

**Table S8.** The lower bounds, upper bounds and increments for optimizing parameters.

| Parameter name                     | Lower bound | Upper bound | Increments |
|------------------------------------|-------------|-------------|------------|
| $w_{hb}$                           | 0           | 10          | 0.5        |
| $w_{ss}$                           | 0           | 10          | 0.5        |
| $w_{rot}(CYS)$                     | 0           | 10          | 0.5        |
| $w_{rot}(ASP)$                     | 0           | 10          | 0.5        |
| $w_{rot}(GLU)$                     | 0           | 10          | 0.5        |
| $w_{rot}(PHE)$                     | 0           | 10          | 0.5        |
| $w_{rot}(HIS)$                     | 0           | 10          | 0.5        |
| $w_{rot}(ILE)$                     | 0           | 10          | 0.5        |
| $w_{rot}(LYS)$                     | 0           | 10          | 0.5        |
| $w_{rot}(LEU)$                     | 0           | 10          | 0.5        |
| $w_{rot}(MET)$                     | 0           | 10          | 0.5        |
| $w_{rot}(ASN)$                     | 0           | 10          | 0.5        |
| $w_{rot}(PRO)$                     | 0           | 10          | 0.5        |
| $w_{rot}(GLN)$                     | 0           | 10          | 0.5        |
| $w_{rot}(ARG)$                     | 0           | 10          | 0.5        |
| $w_{rot}(SER)$                     | 0           | 10          | 0.5        |
| $w_{rot}(THR)$                     | 0           | 10          | 0.5        |
| $w_{rot}(VAL)$                     | 0           | 10          | 0.5        |
| $w_{rot}(TRP)$                     | 0           | 10          | 0.5        |
| $w_{rot}(TYR)$                     | 0           | 10          | 0.5        |
| Self-energy threshold              | 10          | 30          | 5          |
| Main-chain CA radius               | 1.3         | 2.4         | 0.01       |
| Main-chain C radius                | 1.3         | 2.4         | 0.01       |
| CH1 radius                         | 1.3         | 2.4         | 0.01       |
| CH2 radius                         | 1.3         | 2.4         | 0.01       |
| CH3 radius                         | 1.3         | 2.4         | 0.01       |
| Aromatic C radius                  | 1.3         | 2.4         | 0.01       |
| Side-chain CO, COO,HCNN radius     | 1.3         | 2.4         | 0.01       |
| Cys CB radius                      | 1.3         | 2.4         | 0.01       |
| Main-chain N radius                | 1.3         | 2.4         | 0.01       |
| Side-chain -NH-, -NH2, -NH3 radius | 1.3         | 2.4         | 0.01       |
| His NE2 radius                     | 1.3         | 2.4         | 0.01       |
| Pro N radius                       | 1.3         | 2.4         | 0.01       |
| Main-chain O radius                | 1.3         | 2.4         | 0.01       |
| OC radius                          | 1.3         | 2.4         | 0.01       |
| OOC radius                         | 1.3         | 2.4         | 0.01       |
| OH radius                          | 1.3         | 2.4         | 0.01       |
| Cys S radius                       | 1.4         | 2.5         | 0.01       |
| Met S radius                       | 1.4         | 2.5         | 0.01       |
| Main-chain CA well-depth           | 0.05        | 0.5         | 0.01       |
| Main-chain C well-depth            | 0.05        | 0.5         | 0.01       |
| CH1 well-depth                     | 0.05        | 0.5         | 0.01       |

|                                        |      |     |      |
|----------------------------------------|------|-----|------|
| CH2 well-depth                         | 0.05 | 0.5 | 0.01 |
| CH3 well-depth                         | 0.05 | 0.5 | 0.01 |
| Aromatic C well-depth                  | 0.05 | 0.5 | 0.01 |
| Side-chain CO, COO,HCNN well-depth     | 0.05 | 0.5 | 0.01 |
| Cys CB well-depth                      | 0.05 | 0.5 | 0.01 |
| Main-chain N well-depth                | 0.05 | 0.5 | 0.01 |
| Side-chain -NH-, -NH2, -NH3 well-depth | 0.05 | 0.5 | 0.01 |
| His NE2 well-depth                     | 0.05 | 0.5 | 0.01 |
| Pro N well-depth                       | 0.05 | 0.5 | 0.01 |
| Main-chain O well-depth                | 0.05 | 0.5 | 0.01 |
| OC well-depth                          | 0.05 | 0.5 | 0.01 |
| OOC well-depth                         | 0.05 | 0.5 | 0.01 |
| OH well-depth                          | 0.05 | 0.5 | 0.01 |
| Cys S well-depth                       | 0.05 | 0.5 | 0.01 |
| Met S well-depth                       | 0.05 | 0.5 | 0.01 |

**Table S9.** Protein side-chain packing results for 18 amino acid types in terms of  $\chi_{1-4}$  recovery rate on 379 native backbones for the residues in three categories.

| Residue                 | $\chi_{1-4}$ recovery rate (%) |       |      |       |        |         |         |
|-------------------------|--------------------------------|-------|------|-------|--------|---------|---------|
|                         | FASPR                          | CISRR | RASP | SCATD | SCWRL4 | SCWRL4v | ABACUS2 |
| <b>All residues</b>     |                                |       |      |       |        |         |         |
| CYS                     | 85.5                           | 90.8  | 91.0 | 76.5  | 89.1   | 89.5    | 90.9    |
| ASP                     | 59.6                           | 58.6  | 59.2 | 51.8  | 62.5   | 59.6    | 61.9    |
| GLU                     | 29.7                           | 26.5  | 27.8 | 20.3  | 29.9   | 27.3    | 30.9    |
| PHE                     | 83.8                           | 83.1  | 79.4 | 71.5  | 80.8   | 77.3    | 87.2    |
| HIS                     | 60.1                           | 63.2  | 55.7 | 54.9  | 59.7   | 56.2    | 65.6    |
| ILE                     | 84.4                           | 85.4  | 83.4 | 80.7  | 84.6   | 83.4    | 87.1    |
| LYS                     | 33.5                           | 33.5  | 32.2 | 25.7  | 31.2   | 29.5    | 33.6    |
| LEU                     | 85.8                           | 86.4  | 84.3 | 80.2  | 84.7   | 83.4    | 87.3    |
| MET                     | 52.7                           | 54.1  | 50.6 | 38.8  | 49.8   | 47.0    | 54.2    |
| ASN                     | 59.3                           | 56.2  | 57.3 | 46.3  | 57.8   | 57.1    | 60.7    |
| PRO                     | 80.4                           | 79.3  | 81.7 | 78.7  | 80.6   | 79.7    | 79.0    |
| GLN                     | 32.9                           | 27.6  | 30.2 | 20.0  | 32.5   | 30.4    | 32.1    |
| ARG                     | 27.5                           | 26.7  | 25.0 | 13.6  | 29.3   | 24.0    | 29.6    |
| SER                     | 70.0                           | 69.1  | 70.2 | 66.1  | 71.5   | 70.5    | 72.9    |
| THR                     | 91.6                           | 90.9  | 91.4 | 88.7  | 91.6   | 91.1    | 92.6    |
| VAL                     | 93.8                           | 93.9  | 94.0 | 92.5  | 94.3   | 93.7    | 95.1    |
| TRP                     | 77.6                           | 79.2  | 72.4 | 47.6  | 71.9   | 67.1    | 86.3    |
| TYR                     | 80.2                           | 78.6  | 76.8 | 68.0  | 78.1   | 75.6    | 86.0    |
| Total                   | 69.1                           | 68.6  | 67.8 | 61.7  | 68.8   | 67.0    | 71.1    |
| <b>Core residues</b>    |                                |       |      |       |        |         |         |
| CYS                     | 88.1                           | 92.6  | 91.3 | 83.0  | 90.2   | 90.4    | 90.5    |
| ASP                     | 59.3                           | 65.2  | 59.9 | 54.0  | 68.2   | 62.3    | 66.8    |
| GLU                     | 43.2                           | 38.7  | 39.3 | 30.3  | 45.9   | 40.8    | 44.4    |
| PHE                     | 85.6                           | 86.7  | 80.3 | 75.2  | 84.0   | 80.9    | 90.0    |
| HIS                     | 59.6                           | 65.6  | 58.0 | 58.8  | 66.7   | 60.4    | 70.5    |
| ILE                     | 87.3                           | 88.9  | 85.9 | 84.6  | 87.4   | 85.8    | 90.3    |
| LYS                     | 42.3                           | 42.0  | 39.4 | 31.9  | 37.1   | 37.1    | 40.4    |
| LEU                     | 87.3                           | 89.0  | 85.9 | 83.5  | 87.1   | 85.8    | 89.2    |
| MET                     | 59.5                           | 63.1  | 59.5 | 50.1  | 63.3   | 59.8    | 66.2    |
| ASN                     | 65.7                           | 67.3  | 62.6 | 52.0  | 62.4   | 61.7    | 69.7    |
| PRO                     | 84.2                           | 82.6  | 85.1 | 83.9  | 83.3   | 83.3    | 83.7    |
| GLN                     | 44.1                           | 38.2  | 39.8 | 30.6  | 44.1   | 41.4    | 40.5    |
| ARG                     | 34.1                           | 38.0  | 32.5 | 26.5  | 41.5   | 32.9    | 44.9    |
| SER                     | 75.6                           | 72.7  | 73.5 | 70.6  | 76.0   | 74.1    | 79.9    |
| THR                     | 92.9                           | 93.3  | 93.3 | 91.4  | 93.1   | 92.9    | 95.7    |
| VAL                     | 95.4                           | 95.7  | 95.5 | 94.0  | 95.7   | 95.2    | 96.9    |
| TRP                     | 82.4                           | 86.4  | 78.4 | 57.8  | 77.7   | 75.2    | 92.3    |
| TYR                     | 82.0                           | 82.5  | 80.0 | 72.7  | 81.1   | 79.8    | 89.7    |
| Total                   | 80.3                           | 81.4  | 78.9 | 74.7  | 80.7   | 78.9    | 83.8    |
| <b>Surface residues</b> |                                |       |      |       |        |         |         |
| CYS                     | 80.0                           | 80.0  | 87.7 | 49.2  | 81.5   | 83.1    | 84.6    |
| ASP                     | 57.9                           | 56.3  | 56.7 | 49.5  | 58.6   | 56.2    | 57.6    |
| GLU                     | 23.6                           | 21.3  | 22.6 | 15.8  | 21.2   | 20.8    | 23.5    |
| PHE                     | 76.1                           | 67.6  | 70.0 | 55.6  | 65.9   | 60.8    | 75.1    |
| HIS                     | 58.0                           | 55.2  | 50.5 | 46.7  | 50.8   | 48.0    | 53.9    |
| ILE                     | 73.7                           | 73.9  | 73.9 | 68.3  | 74.7   | 75.6    | 76.0    |
| LYS                     | 29.2                           | 28.2  | 27.0 | 21.5  | 26.0   | 25.4    | 27.5    |
| LEU                     | 79.8                           | 77.6  | 79.4 | 70.7  | 78.8   | 77.7    | 80.2    |



|       |      |      |      |      |      |      |      |
|-------|------|------|------|------|------|------|------|
| MET   | 35.4 | 35.9 | 35.4 | 21.5 | 26.2 | 25.6 | 34.4 |
| ASN   | 54.0 | 48.2 | 53.0 | 41.3 | 53.6 | 52.5 | 55.5 |
| PRO   | 77.2 | 75.5 | 78.4 | 76.2 | 77.3 | 76.6 | 74.7 |
| GLN   | 25.4 | 21.9 | 20.8 | 13.7 | 23.3 | 21.3 | 23.0 |
| ARG   | 22.6 | 20.4 | 19.8 | 8.0  | 21.4 | 16.9 | 19.6 |
| SER   | 67.8 | 67.6 | 68.3 | 62.5 | 68.9 | 68.3 | 67.3 |
| THR   | 91.3 | 90.1 | 90.1 | 86.9 | 90.5 | 90.5 | 90.2 |
| VAL   | 88.6 | 88.7 | 88.9 | 87.8 | 89.8 | 89.3 | 89.0 |
| TRP   | 70.3 | 62.5 | 61.7 | 27.3 | 57.8 | 53.9 | 69.5 |
| TYR   | 68.2 | 66.2 | 67.6 | 57.2 | 67.2 | 61.2 | 69.2 |
| Total | 56.8 | 54.8 | 55.5 | 48.4 | 55.5 | 54.1 | 56.0 |

**Note:** the total number of clashes in the 379 structures repacked by ABACUS2 on native main chains is 35.

**Table S10.** The computational time for side-chain modeling on 379 native main chains.

| PDB ID | Time (seconds) |       |      |       |        |         |         |
|--------|----------------|-------|------|-------|--------|---------|---------|
|        | FASPR          | CISRR | RASP | SCATD | SCWRL4 | SCWRL4v | ABACUS2 |
| 1AHO   | 0.02           | 0.88  | 0.03 | 0.16  | 0.63   | 0.13    | 2.55    |
| 1ATZ   | 0.05           | 3.16  | 0.08 | 0.33  | 1.30   | 0.27    | 9.70    |
| 1B2P   | 0.03           | 1.78  | 0.05 | 0.22  | 0.92   | 0.19    | 5.54    |
| 1B8Z   | 0.02           | 0.90  | 0.04 | 0.23  | 0.76   | 0.12    | 2.23    |
| 1B9W   | 0.02           | 1.17  | 0.04 | 0.22  | 0.77   | 0.17    | 3.23    |
| 1BGF   | 0.09           | 3.19  | 0.12 | 0.34  | 2.41   | 0.42    | 6.60    |
| 1BYI   | 0.07           | 3.82  | 0.11 | 0.34  | 1.93   | 0.34    | 11.70   |
| 1C02   | 0.09           | 5.04  | 0.12 | 0.41  | 3.03   | 0.48    | 9.43    |
| 1C48   | 0.02           | 1.01  | 0.03 | 0.18  | 0.62   | 0.12    | 2.83    |
| 1CEI   | 0.03           | 1.44  | 0.05 | 0.22  | 1.13   | 0.18    | 3.70    |
| 1DPT   | 0.04           | 1.80  | 0.06 | 0.24  | 1.04   | 0.2     | 5.19    |
| 1DQ0   | 0.09           | 4.49  | 0.10 | 0.36  | 1.77   | 0.35    | 13.07   |
| 1DV7   | 0.13           | 5.12  | 0.13 | 0.51  | 3.09   | 0.46    | 11.60   |
| 1DYS   | 0.16           | 9.42  | 0.21 | 0.64  | 4.21   | 0.79    | 21.95   |
| 1E5M   | 0.16           | 11.32 | 0.20 | 0.69  | 3.82   | 0.75    | 26.37   |
| 1E6F   | 0.03           | 1.75  | 0.06 | 0.26  | 1.02   | 0.22    | 5.71    |
| 1EDQ   | 0.27           | 17.25 | 0.32 | 0.99  | 5.23   | 1.17    | 35.57   |
| 1ELK   | 0.07           | 2.66  | 0.09 | 0.34  | 1.69   | 0.27    | 7.96    |
| 1ERZ   | 0.19           | 8.58  | 0.20 | 0.71  | 5.19   | 0.73    | 19.13   |
| 1ES5   | 0.09           | 5.50  | 0.10 | 0.45  | 1.90   | 0.37    | 14.59   |
| 1ES9   | 0.11           | 5.03  | 0.13 | 0.47  | 3.20   | 0.57    | 12.27   |
| 1F41   | 0.04           | 1.73  | 0.05 | 0.26  | 1.03   | 0.19    | 5.15    |
| 1F60   | 0.20           | 13.23 | 0.27 | 0.93  | 5.26   | 1       | 26.16   |
| 1F94   | 0.02           | 1.15  | 0.03 | 0.18  | 0.57   | 0.11    | 2.65    |
| 1FCQ   | 0.26           | 10.91 | 0.28 | 0.80  | 5.75   | 0.89    | 22.22   |
| 1FO9   | 0.24           | 12.65 | 0.24 | 0.79  | 5.44   | 2.45    | 22.54   |
| 1FPO   | 0.14           | 3.68  | 0.14 | 0.49  | 3.07   | 14.53   | 9.10    |
| 1FTR   | 0.11           | 7.04  | 0.15 | 0.55  | 2.49   | 0.52    | 15.50   |
| 1FVK   | 0.08           | 3.56  | 0.12 | 0.37  | 2.21   | 0.39    | 10.03   |
| 1G61   | 0.06           | 3.98  | 0.09 | 0.36  | 1.43   | 0.31    | 11.88   |
| 1G8A   | 0.13           | 5.85  | 0.16 | 0.54  | 3.69   | 0.51    | 13.75   |
| 1G8Q   | 0.02           | 1.17  | 0.04 | 0.21  | 0.79   | 0.15    | 3.83    |
| 1GMU   | 0.06           | 2.24  | 0.07 | 0.31  | 1.31   | 0.22    | 6.30    |
| 1GO3   | 0.08           | 3.25  | 0.09 | 0.38  | 2.03   | 0.31    | 8.45    |
| 1GPP   | 0.13           | 5.52  | 0.13 | 0.48  | 2.85   | 0.49    | 11.67   |
| 1GQN   | 0.13           | 5.35  | 0.14 | 0.48  | 5.62   | 0.68    | 15.26   |
| 1GS9   | 0.13           | 5.40  | 0.27 | 0.47  | 3.97   | 1.11    | 7.97    |
| 1GSO   | 0.18           | 10.36 | 0.23 | 0.78  | 4.35   | 0.83    | 23.74   |
| 1GVP   | 0.02           | 1.13  | 0.04 | 0.21  | 0.98   | 0.16    | 3.38    |
| 1GXN   | 0.14           | 9.52  | 0.17 | 0.64  | 3.41   | 0.6     | 21.25   |
| 1H03   | 0.04           | 1.50  | 0.05 | 0.24  | 0.78   | 0.17    | 4.83    |
| 1H4A   | 0.12           | 5.98  | 0.13 | 0.45  | 3.38   | 0.45    | 12.18   |
| 1H4Y   | 0.06           | 2.36  | 0.07 | 0.31  | 1.56   | 0.25    | 5.72    |
| 1HCL   | 0.14           | 7.31  | 0.18 | 0.58  | 3.44   | 0.61    | 17.79   |
| 1HM5   | 0.31           | 19.87 | 0.36 | 1.00  | 8.75   | 1.65    | 38.34   |
| 1HZ6   | 0.01           | 0.77  | 0.03 | 0.17  | 0.49   | 0.09    | 2.68    |
| 1HZ9   | 0.02           | 1.14  | 0.04 | 0.20  | 0.73   | 0.12    | 2.54    |
| 1I4J   | 0.05           | 1.90  | 0.06 | 0.32  | 1.59   | 0.21    | 4.68    |
| 1IGQ   | 0.02           | 0.76  | 0.04 | 0.19  | 0.70   | 0.1     | 2.14    |
| 1IJQ   | 0.12           | 7.94  | 0.16 | 0.53  | 2.87   | 0.56    | 20.07   |

|      |      |       |      |      |       |       |       |
|------|------|-------|------|------|-------|-------|-------|
| 1IJY | 0.06 | 2.22  | 0.07 | 0.31 | 1.52  | 0.25  | 6.60  |
| 1ILK | 0.07 | 2.65  | 0.10 | 0.39 | 2.06  | 0.31  | 6.05  |
| 1IU8 | 0.08 | 4.29  | 0.12 | 0.39 | 1.99  | 0.35  | 11.93 |
| 1J23 | 0.06 | 2.44  | 0.07 | 0.33 | 1.60  | 0.24  | 6.32  |
| 1J2A | 0.06 | 3.08  | 0.09 | 0.30 | 1.48  | 0.3   | 8.23  |
| 1J7G | 0.06 | 2.59  | 0.08 | 0.29 | 1.38  | 0.26  | 7.04  |
| 1JB3 | 0.09 | 2.79  | 0.08 | 0.31 | 1.71  | 0.29  | 6.35  |
| 1JCD | 0.01 | 0.32  | 0.02 | 0.14 | 0.48  | 0.08  | 1.18  |
| 1JKS | 0.15 | 8.62  | 0.19 | 0.61 | 4.20  | 0.66  | 16.97 |
| 1JY2 | 0.01 | 0.33  | 0.02 | 0.15 | 0.28  | 0.07  | 1.32  |
| 1K33 | 0.03 | 0.81  | 0.05 | 0.19 | 1.00  | 0.15  | 2.49  |
| 1KMT | 0.06 | 2.80  | 0.09 | 0.34 | 1.96  | 0.34  | 6.58  |
| 1KMZ | 0.05 | 1.92  | 0.06 | 0.25 | 0.96  | 0.18  | 5.71  |
| 1KN3 | 0.09 | 4.30  | 0.10 | 0.39 | 2.25  | 0.36  | 10.52 |
| 1KOE | 0.08 | 3.87  | 0.10 | 0.41 | 2.39  | 0.35  | 8.90  |
| 1KPT | 0.03 | 1.98  | 0.05 | 0.24 | 0.96  | 0.17  | 4.38  |
| 1KU8 | 0.04 | 2.08  | 0.05 | 0.24 | 0.90  | 0.18  | 6.07  |
| 1KVA | 0.13 | 3.18  | 0.11 | 0.39 | 2.35  | 0.35  | 7.72  |
| 1KVE | 0.01 | 0.44  | 0.02 | 0.16 | 0.45  | 0.08  | 1.32  |
| 1KYF | 0.12 | 5.84  | 0.16 | 0.49 | 3.54  | 0.61  | 14.73 |
| 1KZQ | 0.06 | 3.69  | 0.10 | 0.35 | 1.59  | 0.35  | 11.70 |
| 1L3K | 0.09 | 3.45  | 0.11 | 0.42 | 2.37  | 0.38  | 8.44  |
| 1LBV | 0.14 | 7.02  | 0.15 | 0.57 | 13.22 | 0.5   | 15.43 |
| 1LM5 | 0.10 | 4.50  | 0.12 | 0.48 | 2.84  | 0.73  | 10.35 |
| 1LTU | 0.14 | 8.31  | 0.16 | 0.52 | 3.36  | 0.57  | 18.63 |
| 1M5T | 0.05 | 2.42  | 0.07 | 0.32 | 1.64  | 0.24  | 6.54  |
| 1M6J | 0.11 | 6.50  | 0.14 | 0.52 | 2.75  | 0.47  | 14.69 |
| 1MD6 | 0.06 | 2.48  | 0.07 | 0.29 | 1.33  | 0.23  | 7.18  |
| 1MF7 | 0.13 | 6.21  | 0.15 | 0.52 | 3.51  | 6.62  | 11.84 |
| 1MG7 | 0.18 | 11.12 | 0.22 | 0.69 | 4.62  | 0.84  | 22.78 |
| 1MIX | 0.15 | 5.08  | 0.15 | 0.57 | 4.00  | 3.98  | 11.82 |
| 1MKK | 0.05 | 1.67  | 0.06 | 0.23 | 1.43  | 0.22  | 3.79  |
| 1MML | 0.11 | 6.25  | 0.16 | 0.48 | 3.20  | 0.56  | 14.28 |
| 1MOL | 0.06 | 2.09  | 0.07 | 0.28 | 1.55  | 0.28  | 4.49  |
| 1N1J | 0.03 | 1.17  | 0.05 | 0.22 | 0.88  | 0.15  | 3.26  |
| 1N93 | 0.14 | 7.94  | 0.18 | 0.62 | 3.66  | 0.67  | 17.17 |
| 1NAR | 0.17 | 7.46  | 0.18 | 0.62 | 4.25  | 1.25  | 18.99 |
| 1NM8 | 0.42 | 24.15 | 0.52 | 1.26 | 9.25  | 21.93 | 44.47 |
| 1NWA | 0.09 | 4.32  | 0.11 | 0.49 | 2.80  | 0.4   | 9.39  |
| 1NXM | 0.11 | 3.93  | 0.11 | 0.38 | 2.45  | 1.64  | 10.21 |
| 1OAI | 0.02 | 1.00  | 0.04 | 0.17 | 0.81  | 0.13  | 2.85  |
| 1OAQ | 0.07 | 2.25  | 0.07 | 0.29 | 1.71  | 0.24  | 6.26  |
| 1OGM | 0.31 | 18.33 | 0.36 | 0.90 | 5.51  | 2.22  | 42.85 |
| 1OK7 | 0.21 | 12.44 | 0.24 | 0.81 | 7.91  | 1.09  | 24.43 |
| 1PIX | 0.13 | 5.36  | 0.14 | 0.53 | 2.82  | 9.41  | 15.19 |
| 1P9H | 0.04 | 1.48  | 0.06 | 0.25 | 1.05  | 0.25  | 6.39  |
| 1PCF | 0.02 | 1.12  | 0.04 | 0.22 | 1.14  | 0.16  | 2.60  |
| 1PDO | 0.04 | 1.78  | 0.06 | 0.26 | 1.03  | 0.19  | 6.04  |
| 1PE9 | 0.13 | 8.52  | 0.17 | 0.54 | 3.70  | 0.68  | 22.84 |
| 1PGV | 0.13 | 4.66  | 0.12 | 0.52 | 3.18  | 0.4   | 10.05 |
| 1PM4 | 0.08 | 2.35  | 0.06 | 0.28 | 1.54  | 0.23  | 5.98  |
| 1PXZ | 0.18 | 8.72  | 0.17 | 0.68 | 4.23  | 7.33  | 22.66 |
| 1QAH | 0.03 | 1.74  | 0.06 | 0.25 | 1.09  | 0.21  | 5.67  |

|      |      |       |      |      |       |       |       |
|------|------|-------|------|------|-------|-------|-------|
| 1QKD | 0.02 | 1.02  | 0.03 | 0.20 | 0.75  | 0.12  | 2.37  |
| 1R12 | 0.12 | 6.41  | 0.14 | 0.52 | 3.00  | 0.5   | 14.15 |
| 1R29 | 0.05 | 2.01  | 0.07 | 0.27 | 1.23  | 0.26  | 5.74  |
| 1R77 | 0.04 | 2.15  | 0.05 | 0.26 | 0.92  | 0.18  | 4.86  |
| 1R8N | 0.08 | 3.91  | 0.11 | 0.37 | 2.12  | 0.35  | 8.71  |
| 1RFY | 0.03 | 1.12  | 0.05 | 0.22 | 1.09  | 0.17  | 3.55  |
| 1RGX | 0.02 | 0.81  | 0.04 | 0.20 | 0.59  | 0.13  | 2.78  |
| 1RL0 | 0.08 | 7.22  | 0.16 | 0.58 | 4.81  | 6.01  | 15.33 |
| 1RWZ | 0.13 | 6.60  | 0.14 | 0.59 | 2.94  | 0.49  | 13.86 |
| 1RYL | 0.08 | 3.79  | 0.11 | 0.41 | 2.32  | 0.31  | 8.07  |
| 1RZ2 | 0.14 | 6.03  | 0.17 | 0.51 | 6.10  | 0.73  | 13.77 |
| 1S7I | 0.03 | 1.51  | 0.07 | 0.25 | 1.37  | 0.23  | 4.60  |
| 1S7K | 0.10 | 3.48  | 0.10 | 0.34 | 2.54  | 0.36  | 8.03  |
| 1SAU | 0.06 | 2.66  | 0.08 | 0.29 | 1.95  | 0.27  | 6.10  |
| 1SH8 | 0.23 | 4.25  | 0.13 | 0.49 | 3.20  | 0.57  | 7.41  |
| 1SMX | 0.03 | 1.34  | 0.05 | 0.23 | 1.18  | 0.18  | 3.43  |
| 1SNT | 0.19 | 10.05 | 0.23 | 0.79 | 5.52  | 0.93  | 23.73 |
| 1SQE | 0.06 | 2.11  | 0.07 | 0.29 | 1.78  | 0.26  | 5.00  |
| 1SRV | 0.06 | 2.99  | 0.08 | 0.37 | 1.79  | 0.25  | 7.01  |
| 1SUU | 0.13 | 8.84  | 0.15 | 0.65 | 3.20  | 0.58  | 18.73 |
| 1SWH | 0.03 | 1.46  | 0.05 | 0.21 | 0.88  | 0.15  | 4.91  |
| 1TIJ | 0.06 | 2.37  | 0.08 | 0.31 | 1.78  | 0.24  | 6.35  |
| 1TJE | 0.13 | 5.70  | 0.15 | 0.45 | 3.97  | 0.67  | 13.40 |
| 1TKS | 0.09 | 4.61  | 0.11 | 0.43 | 2.19  | 0.37  | 11.70 |
| 1TP6 | 0.07 | 2.63  | 0.07 | 0.35 | 2.34  | 12.19 | 5.83  |
| 1TUA | 0.11 | 4.62  | 0.14 | 0.55 | 3.66  | 0.43  | 9.54  |
| 1TUO | 0.37 | 13.66 | 0.23 | 0.88 | 6.05  | 1.08  | 27.39 |
| 1TY0 | 0.11 | 5.43  | 0.13 | 0.48 | 2.68  | 37.45 | 15.28 |
| 1TZV | 0.14 | 3.84  | 0.13 | 0.54 | 15.89 | 13.85 | 8.68  |
| 1U07 | 0.04 | 1.48  | 0.08 | 0.28 | 1.35  | 0.19  | 3.85  |
| 1U2H | 0.06 | 2.22  | 0.07 | 0.31 | 2.03  | 0.23  | 4.53  |
| 1U5X | 0.07 | 2.79  | 0.08 | 0.29 | 1.52  | 0.24  | 6.88  |
| 1UEB | 0.07 | 3.43  | 0.11 | 0.38 | 1.99  | 0.39  | 8.97  |
| 1UEK | 0.16 | 6.48  | 0.15 | 0.54 | 3.57  | 0.46  | 13.34 |
| 1UJN | 0.16 | 8.01  | 0.18 | 0.58 | 3.27  | 0.55  | 17.70 |
| 1UKF | 0.15 | 4.37  | 0.10 | 0.49 | 4.47  | 5.33  | 10.72 |
| 1ULN | 0.03 | 1.14  | 0.04 | 0.22 | 0.88  | 0.16  | 2.93  |
| 1ULR | 0.04 | 1.77  | 0.05 | 0.24 | 1.08  | 0.15  | 3.81  |
| 1UNP | 0.20 | 3.18  | 0.11 | 0.46 | 42.66 | 11.86 | 6.17  |
| 1USM | 0.05 | 1.94  | 0.06 | 0.29 | 1.37  | 0.19  | 4.06  |
| 1UXZ | 0.05 | 2.45  | 0.07 | 0.27 | 1.78  | 13.4  | 6.53  |
| 1UZ3 | 0.04 | 1.61  | 0.06 | 0.31 | 1.28  | 0.22  | 4.21  |
| 1V05 | 0.02 | 1.24  | 0.04 | 0.20 | 0.61  | 0.15  | 4.12  |
| 1V0S | 0.24 | 18.72 | 0.26 | 0.98 | 6.20  | 8.32  | 34.62 |
| 1V6T | 0.13 | 6.70  | 0.15 | 0.55 | 2.90  | 0.6   | 15.52 |
| 1V7Q | 0.10 | 4.21  | 0.11 | 0.44 | 2.39  | 0.34  | 9.35  |
| 1V8E | 0.10 | 5.25  | 0.11 | 0.45 | 2.26  | 0.39  | 12.09 |
| 1V8H | 0.04 | 2.37  | 0.06 | 0.28 | 1.37  | 0.22  | 4.40  |
| 1V8I | 0.10 | 3.02  | 0.09 | 0.40 | 2.08  | 0.3   | 7.30  |
| 1VDK | 0.21 | 13.42 | 0.28 | 0.92 | 5.51  | 1.05  | 28.55 |
| 1VE2 | 0.13 | 3.44  | 0.09 | 0.45 | 1.63  | 0.3   | 10.01 |
| 1VGT | 0.07 | 3.46  | 0.10 | 0.38 | 1.84  | 0.34  | 10.59 |
| 1VH5 | 0.06 | 2.68  | 0.08 | 0.36 | 1.62  | 0.25  | 6.75  |

|      |      |       |      |      |       |       |       |
|------|------|-------|------|------|-------|-------|-------|
| 1VJS | 0.29 | 20.78 | 0.31 | 1.00 | 22.44 | 1.83  | 34.79 |
| 1VPI | 0.04 | 2.01  | 0.06 | 0.28 | 1.35  | 0.23  | 5.05  |
| 1W5R | 0.13 | 7.10  | 0.15 | 0.54 | 3.40  | 0.54  | 16.25 |
| 1W7B | 0.21 | 10.40 | 0.22 | 0.80 | 4.74  | 6.27  | 22.45 |
| 1WBA | 0.08 | 3.55  | 0.09 | 0.37 | 1.91  | 0.35  | 9.47  |
| 1WD7 | 0.12 | 5.10  | 0.15 | 0.57 | 2.83  | 0.48  | 13.06 |
| 1WKA | 0.08 | 3.63  | 0.09 | 0.40 | 2.25  | 0.37  | 7.38  |
| 1WKO | 0.08 | 2.98  | 0.09 | 0.35 | 1.84  | 0.34  | 9.89  |
| 1WLG | 0.09 | 5.44  | 0.13 | 0.39 | 1.88  | 0.55  | 16.23 |
| 1WLZ | 0.05 | 1.75  | 0.06 | 0.27 | 1.37  | 0.21  | 4.77  |
| 1WM3 | 0.03 | 1.36  | 0.06 | 0.22 | 1.05  | 0.18  | 3.44  |
| 1WMH | 0.03 | 1.74  | 0.05 | 0.22 | 0.84  | 0.16  | 4.30  |
| 1WQJ | 0.01 | 0.80  | 0.03 | 0.17 | 0.51  | 0.11  | 2.15  |
| 1WTJ | 0.13 | 7.59  | 0.17 | 0.64 | 3.39  | 0.65  | 19.16 |
| 1WU9 | 0.02 | 0.60  | 0.04 | 0.17 | 0.57  | 0.14  | 1.96  |
| 1WVH | 0.05 | 1.80  | 0.06 | 0.26 | 1.27  | 0.23  | 6.25  |
| 1WYC | 0.20 | 11.61 | 0.23 | 0.80 | 18.15 | 27.37 | 23.73 |
| 1WZ3 | 0.02 | 0.86  | 0.04 | 0.20 | 0.64  | 0.14  | 2.44  |
| 1X1E | 0.11 | 4.25  | 0.12 | 0.52 | 2.64  | 0.42  | 11.90 |
| 1X2I | 0.02 | 1.15  | 0.04 | 0.22 | 1.00  | 0.13  | 2.55  |
| 1X6I | 0.06 | 2.30  | 0.07 | 0.31 | 1.72  | 0.25  | 4.71  |
| 1XDZ | 0.11 | 6.00  | 0.14 | 0.50 | 2.81  | 9.74  | 15.10 |
| 1XFK | 0.17 | 10.52 | 0.21 | 0.63 | 4.32  | 0.86  | 21.31 |
| 1XS0 | 0.04 | 2.31  | 0.06 | 0.27 | 1.15  | 0.25  | 6.06  |
| 1XXO | 0.06 | 2.59  | 0.08 | 0.36 | 1.94  | 0.29  | 6.26  |
| 1Y2T | 0.08 | 3.21  | 0.08 | 0.35 | 1.98  | 0.28  | 7.69  |
| 1Y7Y | 0.04 | 1.68  | 0.04 | 0.25 | 1.11  | 0.17  | 2.84  |
| 1YAC | 0.07 | 3.92  | 0.09 | 0.37 | 1.71  | 0.33  | 10.68 |
| 1YHH | 0.13 | 4.76  | 0.14 | 0.48 | 3.71  | 0.57  | 13.85 |
| 1YN3 | 0.03 | 1.47  | 0.05 | 0.26 | 0.89  | 0.18  | 4.49  |
| 1YPF | 0.12 | 6.26  | 0.16 | 0.60 | 3.33  | 0.69  | 16.60 |
| 1YT4 | 0.12 | 8.03  | 0.14 | 0.60 | 3.52  | 0.79  | 16.08 |
| 1YTL | 0.07 | 3.27  | 0.09 | 0.36 | 1.78  | 0.35  | 8.94  |
| 1YU5 | 0.02 | 1.06  | 0.04 | 0.21 | 0.84  | 0.14  | 2.92  |
| 1YW5 | 0.08 | 3.82  | 0.10 | 0.39 | 2.12  | 0.36  | 9.48  |
| 1YXY | 0.08 | 4.34  | 0.11 | 0.47 | 2.52  | 0.46  | 12.03 |
| 1YZM | 0.02 | 0.64  | 0.04 | 0.19 | 0.89  | 0.12  | 1.91  |
| 1Z0C | 0.07 | 3.64  | 0.10 | 0.44 | 2.00  | 0.32  | 10.66 |
| 1Z0P | 0.03 | 1.29  | 0.06 | 0.24 | 1.08  | 0.17  | 3.04  |
| 1ZKR | 0.05 | 2.58  | 0.08 | 0.30 | 1.38  | 0.23  | 7.61  |
| 1ZO2 | 0.07 | 1.87  | 0.08 | 0.27 | 1.79  | 5.61  | 6.50  |
| 1ZRS | 0.15 | 7.78  | 0.15 | 0.58 | 3.64  | 0.64  | 15.87 |
| 1ZUH | 0.09 | 2.90  | 0.10 | 0.34 | 1.82  | 0.37  | 7.54  |
| 1ZV1 | 0.03 | 0.85  | 0.05 | 0.18 | 0.98  | 0.15  | 2.63  |
| 1ZVA | 0.02 | 0.81  | 0.03 | 0.17 | 0.59  | 0.13  | 2.43  |
| 1ZVT | 0.09 | 5.81  | 0.12 | 0.46 | 2.31  | 0.47  | 12.27 |
| 1ZXT | 0.02 | 1.12  | 0.05 | 0.20 | 1.04  | 0.14  | 2.74  |
| 2A35 | 0.10 | 4.63  | 0.11 | 0.42 | 2.43  | 0.35  | 10.74 |
| 2A6W | 0.12 | 6.14  | 0.15 | 0.51 | 2.62  | 0.5   | 13.64 |
| 2A8F | 0.02 | 1.01  | 0.03 | 0.18 | 0.47  | 0.13  | 3.86  |
| 2AHF | 0.29 | 13.80 | 0.26 | 0.91 | 6.92  | 14.86 | 28.59 |
| 2AHN | 0.06 | 3.13  | 0.09 | 0.31 | 1.29  | 0.33  | 10.65 |
| 2B0A | 0.07 | 3.54  | 0.09 | 0.35 | 1.76  | 0.33  | 9.75  |

|      |      |       |      |      |       |       |       |
|------|------|-------|------|------|-------|-------|-------|
| 2B0J | 0.12 | 6.57  | 0.15 | 0.57 | 2.90  | 0.6   | 18.72 |
| 2B2F | 0.11 | 7.62  | 0.13 | 0.51 | 2.21  | 0.47  | 22.75 |
| 2BAY | 0.02 | 0.89  | 0.03 | 0.18 | 0.69  | 0.12  | 2.40  |
| 2BK8 | 0.03 | 1.41  | 0.05 | 0.25 | 1.10  | 0.19  | 4.64  |
| 2BPD | 0.06 | 2.96  | 0.07 | 0.30 | 1.54  | 0.28  | 7.00  |
| 2BVP | 0.46 | 7.79  | 0.22 | 0.71 | 9.25  | 2.76  | 16.90 |
| 2CG7 | 0.03 | 1.99  | 0.05 | 0.26 | 1.27  | 0.18  | 3.20  |
| 2CGH | 0.09 | 5.45  | 0.12 | 0.48 | 2.30  | 0.41  | 12.03 |
| 2CHC | 0.24 | 4.11  | 0.12 | 0.40 | 2.69  | 0.35  | 8.05  |
| 2CI3 | 0.13 | 6.75  | 0.17 | 0.60 | 3.28  | 0.67  | 16.68 |
| 2CIU | 0.07 | 3.09  | 0.09 | 0.37 | 2.52  | 0.35  | 5.97  |
| 2COV | 0.05 | 1.82  | 0.06 | 0.23 | 1.08  | 0.21  | 4.27  |
| 2CWC | 0.17 | 8.85  | 0.19 | 0.71 | 4.17  | 0.58  | 16.62 |
| 2CWK | 0.08 | 3.74  | 0.10 | 0.45 | 2.30  | 0.32  | 7.55  |
| 2CWL | 0.16 | 7.08  | 0.19 | 0.59 | 3.44  | 1.64  | 17.60 |
| 2CWR | 0.02 | 1.02  | 0.04 | 0.20 | 0.64  | 0.19  | 3.96  |
| 2CYG | 0.12 | 7.18  | 0.16 | 0.56 | 3.08  | 0.66  | 18.41 |
| 2D4P | 0.06 | 2.63  | 0.07 | 0.33 | 1.78  | 0.24  | 5.38  |
| 2D68 | 0.02 | 0.98  | 0.04 | 0.21 | 0.81  | 0.13  | 2.64  |
| 2D8E | 0.05 | 1.65  | 0.07 | 0.30 | 1.70  | 0.21  | 3.62  |
| 2DQW | 0.14 | 7.01  | 0.16 | 0.59 | 3.29  | 0.51  | 14.41 |
| 2DYU | 0.15 | 8.38  | 0.19 | 0.57 | 3.70  | 0.77  | 20.38 |
| 2E01 | 0.28 | 17.05 | 0.50 | 0.95 | 5.81  | 1.18  | 30.03 |
| 2E10 | 0.08 | 4.46  | 0.11 | 0.50 | 1.84  | 0.33  | 11.74 |
| 2E3Z | 0.32 | 17.38 | 0.31 | 0.99 | 17.62 | 1.31  | 36.51 |
| 2E64 | 0.09 | 4.58  | 0.11 | 0.45 | 2.08  | 0.34  | 12.74 |
| 2E7A | 0.06 | 2.43  | 0.07 | 0.28 | 1.41  | 0.26  | 7.03  |
| 2E8F | 0.06 | 2.58  | 0.08 | 0.31 | 1.89  | 0.28  | 6.06  |
| 2E8G | 0.12 | 6.71  | 0.15 | 0.58 | 3.13  | 0.49  | 13.59 |
| 2E9Y | 0.15 | 6.88  | 0.16 | 0.56 | 3.35  | 0.59  | 16.73 |
| 2EBB | 0.07 | 2.00  | 0.08 | 0.27 | 1.52  | 0.33  | 5.13  |
| 2EBE | 0.04 | 1.62  | 0.05 | 0.26 | 0.89  | 0.21  | 4.59  |
| 2ECR | 0.06 | 3.10  | 0.07 | 0.33 | 1.56  | 0.28  | 6.17  |
| 2EGJ | 0.10 | 2.81  | 0.09 | 0.33 | 2.25  | 0.39  | 7.12  |
| 2EHG | 0.07 | 2.94  | 0.09 | 0.34 | 1.88  | 0.31  | 8.06  |
| 2EPI | 0.04 | 1.54  | 0.06 | 0.25 | 1.28  | 0.2   | 4.43  |
| 2ETX | 0.08 | 3.68  | 0.10 | 0.43 | 1.98  | 0.35  | 9.41  |
| 2EX0 | 0.21 | 11.69 | 0.29 | 0.80 | 5.51  | 1.18  | 27.06 |
| 2F23 | 0.09 | 3.28  | 0.12 | 0.40 | 2.75  | 21.08 | 6.99  |
| 2F5G | 0.07 | 2.36  | 0.09 | 0.33 | 1.88  | 0.32  | 6.24  |
| 2F6L | 0.08 | 3.35  | 0.11 | 0.38 | 2.40  | 0.33  | 8.30  |
| 2FBN | 0.08 | 3.09  | 0.09 | 0.37 | 1.72  | 0.3   | 8.75  |
| 2FBQ | 0.12 | 5.38  | 0.13 | 0.48 | 2.98  | 2.12  | 10.17 |
| 2FD5 | 0.07 | 2.93  | 0.10 | 0.40 | 2.02  | 1.38  | 7.70  |
| 2FHZ | 0.04 | 1.88  | 0.05 | 0.25 | 0.79  | 0.19  | 4.97  |
| 2FJZ | 0.02 | 0.74  | 0.03 | 0.17 | 0.62  | 0.15  | 2.32  |
| 2FL4 | 0.10 | 2.90  | 0.11 | 0.38 | 2.57  | 0.37  | 6.95  |
| 2FLU | 0.13 | 7.60  | 0.14 | 0.56 | 2.92  | 0.59  | 17.10 |
| 2FRG | 0.05 | 1.73  | 0.07 | 0.24 | 1.50  | 0.4   | 4.48  |
| 2FVH | 0.04 | 1.74  | 0.07 | 0.29 | 1.32  | 0.26  | 4.17  |
| 2FW7 | 0.04 | 2.10  | 0.06 | 0.28 | 0.94  | 0.21  | 6.57  |
| 2G2U | 0.12 | 7.73  | 0.17 | 0.63 | 3.40  | 0.56  | 15.44 |
| 2G30 | 0.11 | 5.24  | 0.14 | 0.45 | 2.56  | 0.57  | 13.74 |

|      |      |       |      |      |       |       |       |
|------|------|-------|------|------|-------|-------|-------|
| 2G40 | 0.06 | 2.72  | 0.08 | 0.33 | 1.57  | 0.31  | 7.50  |
| 2G69 | 0.04 | 1.45  | 0.05 | 0.23 | 0.85  | 0.21  | 4.00  |
| 2G7I | 0.05 | 2.31  | 0.07 | 0.32 | 1.40  | 0.26  | 5.46  |
| 2G7O | 0.02 | 0.62  | 0.03 | 0.19 | 0.54  | 0.12  | 2.01  |
| 2GAS | 0.16 | 7.47  | 0.18 | 0.59 | 3.72  | 0.79  | 18.43 |
| 2GDQ | 0.24 | 13.22 | 0.36 | 0.74 | 16.04 | 10.74 | 25.72 |
| 2GEC | 0.06 | 2.68  | 0.08 | 0.37 | 2.05  | 0.33  | 6.54  |
| 2GGV | 0.01 | 0.47  | 0.02 | 0.14 | 0.43  | 0.14  | 1.32  |
| 2GIY | 0.07 | 3.03  | 0.08 | 0.33 | 1.59  | 0.36  | 8.85  |
| 2GKG | 0.04 | 2.36  | 0.07 | 0.32 | 1.48  | 0.35  | 5.99  |
| 2GKV | 0.04 | 2.66  | 0.06 | 0.28 | 0.94  | 0.21  | 8.24  |
| 2GOM | 0.03 | 1.08  | 0.05 | 0.24 | 1.16  | 0.16  | 2.88  |
| 2GQV | 0.02 | 0.93  | 0.03 | 0.18 | 0.75  | 0.11  | 2.38  |
| 2GXG | 0.06 | 2.17  | 0.09 | 0.38 | 2.11  | 0.28  | 6.26  |
| 2H14 | 0.12 | 6.73  | 0.13 | 0.52 | 2.45  | 0.53  | 21.49 |
| 2H2R | 0.07 | 3.09  | 0.08 | 0.32 | 1.68  | 0.27  | 7.53  |
| 2H2Z | 0.13 | 6.66  | 0.17 | 0.51 | 3.04  | 0.65  | 18.95 |
| 2H7W | 0.04 | 1.53  | 0.06 | 0.22 | 1.17  | 0.23  | 5.04  |
| 2H7Z | 0.02 | 1.21  | 0.03 | 0.22 | 0.70  | 0.14  | 2.87  |
| 2H8E | 0.07 | 3.15  | 0.08 | 0.35 | 1.79  | 0.28  | 5.98  |
| 2H8O | 0.12 | 8.29  | 0.16 | 0.58 | 3.40  | 0.59  | 14.98 |
| 2HC8 | 0.02 | 1.40  | 0.05 | 0.24 | 0.72  | 0.21  | 4.46  |
| 2HLR | 0.01 | 0.86  | 0.03 | 0.16 | 0.44  | 0.12  | 2.35  |
| 2HLY | 0.09 | 4.22  | 0.11 | 0.42 | 2.16  | 0.45  | 10.60 |
| 2HOQ | 0.15 | 5.93  | 0.16 | 0.55 | 3.23  | 0.55  | 14.80 |
| 2HPL | 0.05 | 1.92  | 0.06 | 0.24 | 1.19  | 0.18  | 4.88  |
| 2HWW | 0.07 | 2.88  | 0.10 | 0.39 | 1.68  | 0.29  | 8.44  |
| 2HY5 | 0.08 | 3.10  | 0.09 | 0.36 | 2.09  | 0.35  | 6.97  |
| 2HZF | 0.05 | 2.08  | 0.07 | 0.27 | 1.48  | 0.24  | 5.28  |
| 2I3F | 0.10 | 5.48  | 0.14 | 0.50 | 2.93  | 0.47  | 13.17 |
| 2I49 | 0.22 | 14.11 | 0.25 | 0.76 | 5.26  | 1.1   | 28.46 |
| 2I5D | 0.09 | 3.51  | 0.13 | 0.38 | 2.69  | 0.38  | 10.20 |
| 2I6V | 0.04 | 1.52  | 0.06 | 0.23 | 1.14  | 0.2   | 3.80  |
| 2IBL | 0.02 | 1.08  | 0.05 | 0.22 | 0.76  | 0.15  | 3.14  |
| 2IC6 | 0.03 | 1.18  | 0.05 | 0.23 | 0.90  | 0.14  | 2.72  |
| 2IC7 | 0.09 | 3.63  | 0.10 | 0.39 | 2.23  | 0.36  | 9.11  |
| 2IIA | 0.02 | 1.18  | 0.04 | 0.20 | 0.70  | 0.14  | 3.66  |
| 2IJK | 0.02 | 0.84  | 0.03 | 0.17 | 0.59  | 0.15  | 2.19  |
| 2IP2 | 0.18 | 7.86  | 0.20 | 0.67 | 3.79  | 0.63  | 16.87 |
| 2IPR | 0.05 | 2.52  | 0.07 | 0.28 | 1.22  | 0.26  | 6.94  |
| 2IRU | 0.13 | 7.51  | 0.15 | 0.64 | 3.29  | 0.74  | 16.33 |
| 2IUM | 0.05 | 3.04  | 0.09 | 0.30 | 1.46  | 0.3   | 10.40 |
| 2IXM | 0.16 | 8.24  | 0.19 | 0.70 | 5.20  | 1.08  | 19.72 |
| 2IY9 | 0.12 | 7.01  | 0.13 | 0.54 | 2.78  | 0.67  | 17.98 |
| 2IZ6 | 0.03 | 1.91  | 0.05 | 0.26 | 0.82  | 0.2   | 6.59  |
| 2JJ  | 0.07 | 3.56  | 0.08 | 0.34 | 1.59  | 0.3   | 9.96  |
| 2J5Y | 0.01 | 0.78  | 0.03 | 0.19 | 0.43  | 0.14  | 2.02  |
| 2J6B | 0.03 | 1.90  | 0.06 | 0.27 | 1.08  | 0.24  | 4.97  |
| 2J7I | 0.10 | 2.29  | 0.07 | 0.28 | 1.52  | 0.91  | 5.06  |
| 2J8B | 0.03 | 1.29  | 0.04 | 0.22 | 0.70  | 0.19  | 3.52  |
| 2J9W | 0.06 | 2.27  | 0.07 | 0.31 | 1.37  | 0.37  | 5.36  |
| 2JCP | 0.06 | 2.68  | 0.07 | 0.36 | 1.27  | 0.33  | 7.65  |
| 2NML | 0.05 | 2.19  | 0.07 | 0.26 | 1.65  | 0.43  | 4.80  |

|      |      |       |      |      |      |       |       |
|------|------|-------|------|------|------|-------|-------|
| 2NNU | 0.09 | 4.06  | 0.13 | 0.37 | 2.50 | 0.53  | 11.94 |
| 2NPT | 0.04 | 2.04  | 0.06 | 0.27 | 1.31 | 0.23  | 4.36  |
| 2NRR | 0.12 | 2.68  | 0.10 | 0.43 | 2.35 | 0.39  | 7.33  |
| 2NV0 | 0.08 | 3.93  | 0.10 | 0.39 | 2.33 | 0.48  | 10.25 |
| 2O0Q | 0.05 | 1.68  | 0.07 | 0.26 | 1.36 | 0.27  | 5.22  |
| 2O2K | 0.22 | 10.65 | 0.22 | 0.86 | 5.35 | 1.21  | 21.26 |
| 2O6S | 0.08 | 3.92  | 0.09 | 0.36 | 2.21 | 0.43  | 11.04 |
| 2O6X | 0.17 | 8.45  | 0.20 | 0.65 | 4.59 | 0.96  | 20.88 |
| 2OEB | 0.06 | 3.14  | 0.08 | 0.32 | 1.74 | 0.28  | 8.75  |
| 2OHW | 0.06 | 2.39  | 0.09 | 0.32 | 1.91 | 0.28  | 6.94  |
| 2OIX | 0.11 | 3.82  | 0.11 | 0.44 | 4.89 | 5.21  | 9.50  |
| 2OL7 | 0.07 | 4.79  | 0.10 | 0.45 | 1.96 | 0.49  | 11.30 |
| 2OSA | 0.10 | 4.61  | 0.11 | 0.40 | 2.03 | 0.4   | 12.36 |
| 2OTU | 0.04 | 1.46  | 0.06 | 0.22 | 1.10 | 0.22  | 5.10  |
| 2P1G | 0.12 | 5.27  | 1.32 | 0.56 | 3.36 | 6.98  | 13.38 |
| 2P38 | 0.10 | 3.15  | 0.11 | 0.37 | 2.58 | 0.37  | 8.13  |
| 2P4H | 0.12 | 7.32  | 0.15 | 0.60 | 2.69 | 0.62  | 18.05 |
| 2P52 | 0.11 | 5.85  | 0.12 | 0.50 | 3.49 | 0.52  | 11.70 |
| 2P5D | 0.10 | 3.98  | 0.10 | 0.43 | 2.61 | 0.48  | 8.56  |
| 2P5K | 0.03 | 1.02  | 0.04 | 0.21 | 1.18 | 0.19  | 2.84  |
| 2P65 | 0.08 | 3.72  | 0.11 | 0.41 | 2.07 | 0.34  | 9.16  |
| 2P84 | 0.08 | 2.96  | 0.09 | 0.33 | 2.57 | 1.49  | 6.69  |
| 2PBP | 0.15 | 6.05  | 0.17 | 0.55 | 3.44 | 0.55  | 13.14 |
| 2PBQ | 0.06 | 2.61  | 0.08 | 0.32 | 1.55 | 0.3   | 8.37  |
| 2PEF | 0.17 | 10.75 | 0.21 | 0.63 | 3.50 | 0.91  | 29.02 |
| 2PET | 0.12 | 5.17  | 0.14 | 0.48 | 2.89 | 0.54  | 11.27 |
| 2PGE | 0.22 | 10.38 | 0.24 | 0.69 | 6.16 | 22.85 | 22.26 |
| 2PKF | 0.16 | 8.55  | 0.17 | 0.59 | 3.89 | 1.32  | 17.46 |
| 2PMR | 0.04 | 1.39  | 0.05 | 0.22 | 0.95 | 0.16  | 3.82  |
| 2PND | 0.07 | 2.41  | 0.08 | 0.34 | 2.11 | 0.29  | 6.11  |
| 2PST | 0.03 | 1.13  | 0.04 | 0.21 | 0.79 | 0.14  | 2.66  |
| 2PTV | 0.06 | 2.54  | 0.07 | 0.33 | 1.92 | 0.25  | 4.96  |
| 2PV2 | 0.05 | 1.51  | 0.06 | 0.26 | 1.09 | 0.22  | 4.12  |
| 2Q8O | 0.05 | 1.78  | 0.06 | 0.24 | 1.22 | 0.23  | 5.76  |
| 2QIY | 0.07 | 2.72  | 0.08 | 0.33 | 1.60 | 0.66  | 7.17  |
| 2QOL | 0.12 | 7.54  | 0.15 | 0.60 | 3.16 | 0.54  | 16.39 |
| 2QPW | 0.07 | 3.14  | 0.08 | 0.31 | 1.50 | 0.27  | 7.27  |
| 2QR3 | 0.04 | 1.82  | 0.06 | 0.28 | 1.12 | 0.22  | 6.11  |
| 2QT4 | 0.02 | 1.15  | 0.04 | 0.21 | 0.61 | 0.12  | 3.02  |
| 2R6U | 0.04 | 1.72  | 0.05 | 0.28 | 0.87 | 0.18  | 4.95  |
| 2R77 | 0.08 | 4.56  | 0.11 | 0.39 | 1.86 | 0.36  | 11.77 |
| 2R99 | 0.07 | 3.33  | 0.10 | 0.32 | 1.84 | 0.35  | 8.86  |
| 2RCZ | 0.02 | 0.77  | 0.04 | 0.24 | 0.67 | 0.13  | 2.39  |
| 2RFA | 0.09 | 4.71  | 0.12 | 0.40 | 2.42 | 0.44  | 12.20 |
| 2RIK | 0.12 | 6.36  | 0.17 | 0.50 | 3.50 | 0.61  | 14.91 |
| 2RJD | 0.16 | 9.61  | 0.18 | 0.65 | 3.95 | 0.69  | 19.70 |
| 2RK5 | 0.03 | 1.36  | 0.05 | 0.22 | 0.86 | 0.16  | 4.43  |
| 2VC8 | 0.02 | 0.72  | 0.03 | 0.17 | 0.45 | 0.15  | 2.85  |
| 2YXF | 0.05 | 1.68  | 0.06 | 0.25 | 1.35 | 0.24  | 5.04  |
| 2YYV | 0.09 | 4.54  | 0.11 | 0.43 | 2.42 | 0.39  | 12.87 |
| 2YZ1 | 0.04 | 1.39  | 0.05 | 0.26 | 0.83 | 0.18  | 4.81  |
| 2Z14 | 0.06 | 2.36  | 0.07 | 0.29 | 1.58 | 0.25  | 5.86  |
| 2Z1E | 0.12 | 6.80  | 0.14 | 0.54 | 2.52 | 0.48  | 16.31 |



|       |       |         |       |        |        |        |         |
|-------|-------|---------|-------|--------|--------|--------|---------|
| 2Z37  | 0.13  | 5.62    | 0.12  | 0.52   | 2.08   | 0.42   | 14.67   |
| 2ZFY  | 0.14  | 6.12    | 0.17  | 0.52   | 3.91   | 0.57   | 14.90   |
| 3ADO  | 0.15  | 6.61    | 0.19  | 0.69   | 3.80   | 0.63   | 18.18   |
| 3BB7  | 0.12  | 6.78    | 0.14  | 0.54   | 2.57   | 0.6    | 19.50   |
| 3BN6  | 0.28  | 3.99    | 0.09  | 0.35   | 2.01   | 0.36   | 9.13    |
| 3C4S  | 0.01  | 0.86    | 0.03  | 0.16   | 0.60   | 0.1    | 2.29    |
| 3PHS  | 0.10  | 5.74    | 0.13  | 0.52   | 2.95   | 0.53   | 12.46   |
| 3SSW  | 0.05  | 1.41    | 0.07  | 0.27   | 1.37   | 0.21   | 4.27    |
| 4RWU  | 0.03  | 1.22    | 0.05  | 0.25   | 1.00   | 0.16   | 3.37    |
| 5WOF  | 0.03  | 1.47    | 0.05  | 0.22   | 1.05   | 0.21   | 3.88    |
| 6XIA  | 0.23  | 12.92   | 0.24  | 0.81   | 5.38   | 0.85   | 23.21   |
| Total | 34.30 | 1638.65 | 42.20 | 153.16 | 984.96 | 453.51 | 3871.18 |

**Table S11.** Protein side-chain packing results for 18 amino acid types in terms of  $\chi_{1-4}$  recovery rate on 379 I-TASSER modeled backbones for the residues in three categories.

| Residue                 | $\chi_{1-4}$ success rate (%) |       |      |       |        |         |         |          |
|-------------------------|-------------------------------|-------|------|-------|--------|---------|---------|----------|
|                         | FASPR                         | CISRR | RASP | SCATD | SCWRL4 | SCWRL4v | ABACUS2 | I-TASSER |
| <b>All residues</b>     |                               |       |      |       |        |         |         |          |
| CYS                     | 75.1                          | 79.6  | 76.6 | 68.0  | 77.0   | 75.7    | 80.0    | 74.5     |
| ASP                     | 47.7                          | 47.4  | 47.0 | 43.4  | 49.2   | 46.5    | 50.3    | 44.6     |
| GLU                     | 21.2                          | 21.0  | 21.1 | 17.8  | 23.3   | 20.9    | 23.1    | 25.1     |
| PHE                     | 72.3                          | 71.9  | 69.4 | 63.5  | 68.9   | 64.1    | 73.9    | 73.1     |
| HIS                     | 49.9                          | 50.7  | 46.9 | 45.3  | 49.7   | 46.7    | 52.8    | 62.2     |
| ILE                     | 72.2                          | 70.9  | 68.9 | 68.2  | 71.3   | 69.9    | 74.0    | 58.0     |
| LYS                     | 27.0                          | 27.9  | 23.8 | 22.2  | 24.6   | 23.4    | 25.5    | 16.0     |
| LEU                     | 78.1                          | 75.4  | 72.9 | 72.2  | 74.9   | 72.6    | 76.6    | 67.3     |
| MET                     | 36.3                          | 37.6  | 33.0 | 29.3  | 35.2   | 32.1    | 38.8    | 39.8     |
| ASN                     | 45.3                          | 42.3  | 44.2 | 36.9  | 44.0   | 42.8    | 45.4    | 44.5     |
| PRO                     | 63.6                          | 62.0  | 64.9 | 64.0  | 63.2   | 63.3    | 65.1    | 61.8     |
| GLN                     | 23.2                          | 21.2  | 22.2 | 15.8  | 25.3   | 22.6    | 24.6    | 28.5     |
| ARG                     | 19.8                          | 19.1  | 17.4 | 10.5  | 20.4   | 16.2    | 19.2    | 20.3     |
| SER                     | 56.5                          | 56.7  | 56.9 | 54.2  | 58.6   | 57.1    | 58.7    | 54.6     |
| THR                     | 78.4                          | 75.9  | 75.9 | 73.1  | 77.2   | 75.9    | 77.7    | 59.6     |
| VAL                     | 84.2                          | 82.7  | 82.2 | 82.4  | 83.9   | 82.7    | 85.2    | 74.1     |
| TRP                     | 62.6                          | 63.8  | 56.4 | 41.0  | 57.4   | 52.4    | 69.2    | 72.1     |
| TYR                     | 67.4                          | 66.9  | 64.3 | 59.5  | 65.3   | 63.3    | 70.1    | 67.9     |
| Total                   | 58.0                          | 57.1  | 55.9 | 52.7  | 57.4   | 55.3    | 59.1    | 53.3     |
| <b>Core residues</b>    |                               |       |      |       |        |         |         |          |
| CYS                     | 80.0                          | 81.9  | 80.7 | 75.6  | 80.3   | 78.8    | 81.7    | 77.9     |
| ASP                     | 51.3                          | 52.5  | 50.5 | 48.7  | 55.8   | 50.3    | 52.5    | 60.9     |
| GLU                     | 29.4                          | 30.6  | 29.4 | 28.5  | 36.9   | 32.4    | 33.9    | 45.3     |
| PHE                     | 76.2                          | 77.7  | 72.5 | 69.6  | 74.7   | 70.1    | 81.4    | 76.9     |
| HIS                     | 51.8                          | 54.7  | 51.2 | 50.7  | 55.8   | 51.8    | 56.4    | 73.2     |
| ILE                     | 76.6                          | 75.7  | 73.7 | 73.5  | 76.5   | 74.9    | 78.9    | 64.5     |
| LYS                     | 35.8                          | 39.1  | 30.0 | 30.3  | 33.2   | 30.0    | 32.2    | 33.6     |
| LEU                     | 80.8                          | 78.8  | 76.2 | 77.2  | 79.2   | 77.0    | 79.2    | 75.1     |
| MET                     | 43.4                          | 45.1  | 39.4 | 39.6  | 46.3   | 41.3    | 48.6    | 51.2     |
| ASN                     | 52.0                          | 52.4  | 51.3 | 45.8  | 48.0   | 46.7    | 55.5    | 65.9     |
| PRO                     | 72.4                          | 71.9  | 72.0 | 70.8  | 70.3   | 71.7    | 72.9    | 71.0     |
| GLN                     | 32.2                          | 33.6  | 27.6 | 27.0  | 35.5   | 35.2    | 34.2    | 52.0     |
| ARG                     | 28.3                          | 27.9  | 26.0 | 20.3  | 34.3   | 27.4    | 31.1    | 38.7     |
| SER                     | 62.3                          | 60.8  | 61.7 | 58.5  | 65.2   | 61.7    | 66.4    | 63.5     |
| THR                     | 83.6                          | 82.9  | 83.2 | 79.3  | 84.6   | 83.1    | 86.3    | 69.3     |
| VAL                     | 87.8                          | 87.0  | 86.3 | 86.0  | 87.8   | 86.3    | 89.6    | 80.1     |
| TRP                     | 68.7                          | 73.9  | 63.0 | 50.9  | 65.3   | 60.3    | 79.2    | 77.7     |
| TYR                     | 71.8                          | 71.9  | 70.2 | 64.6  | 70.3   | 68.6    | 76.5    | 71.9     |
| Total                   | 70.9                          | 70.7  | 68.4 | 66.7  | 71.0   | 68.5    | 73.1    | 69.1     |
| <b>Surface residues</b> |                               |       |      |       |        |         |         |          |
| CYS                     | 60.0                          | 64.6  | 63.1 | 44.6  | 66.2   | 61.5    | 64.6    | 63.1     |
| ASP                     | 44.3                          | 43.7  | 44.7 | 39.4  | 44.7   | 42.3    | 46.9    | 34.7     |
| GLU                     | 17.7                          | 17.3  | 17.5 | 13.7  | 17.7   | 17.2    | 17.6    | 16.1     |
| PHE                     | 59.4                          | 53.2  | 56.3 | 45.1  | 50.5   | 47.1    | 55.6    | 61.8     |
| HIS                     | 42.3                          | 41.4  | 39.2 | 35.4  | 40.4   | 39.5    | 42.3    | 45.8     |
| ILE                     | 59.5                          | 58.5  | 55.3 | 54.5  | 58.2   | 56.8    | 59.9    | 39.9     |
| LYS                     | 22.0                          | 23.2  | 19.9 | 17.6  | 20.3   | 20.1    | 20.9    | 9.8      |
| LEU                     | 67.6                          | 65.0  | 64.8 | 58.7  | 62.1   | 59.8    | 66.0    | 46.1     |

|       |      |      |      |      |      |      |      |      |
|-------|------|------|------|------|------|------|------|------|
| MET   | 17.9 | 20.0 | 20.5 | 13.3 | 13.8 | 14.9 | 20.5 | 19.0 |
| ASN   | 41.1 | 34.5 | 39.4 | 31.2 | 39.2 | 39.6 | 38.1 | 33.0 |
| PRO   | 58.0 | 55.4 | 60.0 | 58.7 | 58.5 | 57.7 | 59.2 | 55.4 |
| GLN   | 15.9 | 15.5 | 15.8 | 10.0 | 18.8 | 15.3 | 17.4 | 14.8 |
| ARG   | 16.0 | 15.4 | 14.5 | 6.2  | 12.7 | 11.8 | 11.8 | 11.3 |
| SER   | 53.5 | 54.5 | 53.7 | 50.6 | 55.2 | 54.2 | 51.7 | 46.6 |
| THR   | 73.7 | 69.5 | 70.1 | 67.7 | 71.0 | 70.8 | 69.0 | 50.3 |
| VAL   | 73.9 | 72.2 | 71.1 | 73.3 | 73.3 | 72.0 | 73.1 | 58.3 |
| TRP   | 50.8 | 38.3 | 43.8 | 19.5 | 39.1 | 33.6 | 50.0 | 61.7 |
| TYR   | 47.8 | 48.5 | 45.2 | 42.8 | 48.5 | 45.2 | 47.5 | 51.5 |
| Total | 44.0 | 42.5 | 42.8 | 38.5 | 42.9 | 41.7 | 43.1 | 35.5 |

**Note:** the total number of clashes in 379 I-TASSER and ABACUS2 structures is 0 and 132, respectively.

**Table S12.** Protein side-chain packing results for 18 amino acid types in terms of  $\chi_{1-4}$  recovery rate on 379 perturbed backbones (RMSD = 0.21 Å) for the residues in three categories.

| Residue                 | $\chi_{1-4}$ recovery rate (%) |       |      |       |        |         |         |
|-------------------------|--------------------------------|-------|------|-------|--------|---------|---------|
|                         | FASPR                          | CISRR | RASP | SCATD | SCWRL4 | SCWRL4v | ABACUS2 |
| <b>All residues</b>     |                                |       |      |       |        |         |         |
| CYS                     | 85.4                           | 90.5  | 90.7 | 76.4  | 88.9   | 89.5    | 91.4    |
| ASP                     | 59.0                           | 57.3  | 58.3 | 52.1  | 61.4   | 58.5    | 60.5    |
| GLU                     | 28.7                           | 26.5  | 27.0 | 20.7  | 29.9   | 27.2    | 30.4    |
| PHE                     | 83.2                           | 81.6  | 78.5 | 70.8  | 79.8   | 76.1    | 86.0    |
| HIS                     | 60.1                           | 61.2  | 55.6 | 53.2  | 60.4   | 54.9    | 64.3    |
| ILE                     | 83.5                           | 84.8  | 82.4 | 79.8  | 83.9   | 82.6    | 86.2    |
| LYS                     | 32.6                           | 33.3  | 31.3 | 25.6  | 30.9   | 28.9    | 32.7    |
| LEU                     | 85.1                           | 85.6  | 82.9 | 79.1  | 83.9   | 82.8    | 86.5    |
| MET                     | 50.3                           | 53.1  | 48.5 | 37.7  | 48.3   | 44.5    | 52.8    |
| ASN                     | 57.8                           | 55.2  | 56.0 | 45.0  | 57.3   | 55.1    | 59.3    |
| PRO                     | 79.8                           | 78.9  | 80.7 | 78.2  | 80.1   | 78.7    | 78.7    |
| GLN                     | 31.6                           | 27.6  | 29.8 | 19.7  | 32.2   | 30.3    | 32.3    |
| ARG                     | 26.3                           | 26.0  | 23.7 | 13.4  | 28.8   | 23.8    | 27.9    |
| SER                     | 69.7                           | 68.7  | 69.0 | 65.8  | 70.7   | 69.7    | 71.6    |
| THR                     | 91.2                           | 90.6  | 91.1 | 88.3  | 91.4   | 91.2    | 92.0    |
| VAL                     | 93.6                           | 93.8  | 93.4 | 92.2  | 93.9   | 93.1    | 94.7    |
| TRP                     | 77.1                           | 78.6  | 71.7 | 47.4  | 70.8   | 65.7    | 84.3    |
| TYR                     | 79.2                           | 78.5  | 75.7 | 67.5  | 77.8   | 74.9    | 84.7    |
| Total                   | 68.4                           | 68.0  | 66.9 | 61.2  | 68.3   | 66.3    | 70.2    |
| <b>Core residues</b>    |                                |       |      |       |        |         |         |
| CYS                     | 87.9                           | 92.2  | 90.7 | 82.4  | 89.2   | 90.0    | 90.9    |
| ASP                     | 56.4                           | 60.1  | 57.2 | 54.4  | 65.2   | 59.7    | 66.2    |
| GLU                     | 38.1                           | 39.6  | 37.2 | 31.5  | 45.6   | 40.5    | 42.3    |
| PHE                     | 84.9                           | 84.0  | 79.5 | 74.4  | 83.0   | 79.0    | 89.2    |
| HIS                     | 60.7                           | 64.5  | 56.9 | 56.6  | 66.1   | 59.3    | 66.9    |
| ILE                     | 86.5                           | 88.6  | 84.8 | 83.5  | 86.5   | 85.3    | 89.4    |
| LYS                     | 40.1                           | 41.7  | 38.1 | 31.6  | 36.5   | 32.9    | 38.1    |
| LEU                     | 86.6                           | 88.3  | 84.6 | 82.5  | 86.2   | 85.1    | 88.4    |
| MET                     | 56.4                           | 63.9  | 56.2 | 48.0  | 62.5   | 57.2    | 64.1    |
| ASN                     | 61.5                           | 65.3  | 59.3 | 49.6  | 61.5   | 56.6    | 67.0    |
| PRO                     | 83.2                           | 81.9  | 84.2 | 81.6  | 83.5   | 80.7    | 83.9    |
| GLN                     | 40.8                           | 39.8  | 38.5 | 29.3  | 41.4   | 42.8    | 41.4    |
| ARG                     | 33.9                           | 37.6  | 31.1 | 24.7  | 40.3   | 32.5    | 41.0    |
| SER                     | 74.5                           | 71.9  | 71.6 | 70.2  | 74.6   | 71.9    | 78.2    |
| THR                     | 92.4                           | 93.5  | 91.9 | 90.9  | 92.2   | 92.7    | 95.1    |
| VAL                     | 95.3                           | 95.4  | 94.9 | 94.0  | 95.2   | 94.4    | 96.3    |
| TRP                     | 81.1                           | 84.4  | 77.7 | 56.3  | 77.7   | 74.9    | 90.3    |
| TYR                     | 80.7                           | 82.1  | 78.6 | 71.7  | 81.0   | 78.9    | 87.6    |
| Total                   | 79.3                           | 80.6  | 77.6 | 73.9  | 79.9   | 77.7    | 82.7    |
| <b>Surface residues</b> |                                |       |      |       |        |         |         |
| CYS                     | 78.5                           | 80.0  | 84.6 | 50.8  | 81.5   | 83.1    | 87.7    |
| ASP                     | 58.2                           | 55.8  | 56.4 | 49.6  | 58.2   | 55.9    | 56.5    |
| GLU                     | 23.1                           | 21.0  | 22.5 | 16.1  | 21.3   | 21.2    | 23.2    |
| PHE                     | 74.1                           | 67.2  | 69.6 | 55.3  | 66.6   | 61.4    | 71.7    |
| HIS                     | 58.0                           | 55.2  | 51.7 | 44.8  | 51.1   | 46.7    | 54.2    |
| ILE                     | 72.7                           | 73.1  | 73.1 | 68.5  | 74.7   | 73.7    | 74.7    |
| LYS                     | 28.5                           | 27.7  | 26.1 | 21.5  | 26.0   | 25.3    | 27.1    |

|       |      |      |      |      |      |      |      |
|-------|------|------|------|------|------|------|------|
| LEU   | 78.9 | 76.2 | 78.0 | 69.8 | 77.7 | 77.0 | 79.6 |
| MET   | 33.3 | 33.3 | 32.8 | 21.0 | 24.1 | 24.1 | 34.4 |
| ASN   | 54.4 | 47.9 | 52.3 | 40.8 | 53.0 | 51.5 | 54.2 |
| PRO   | 76.9 | 75.7 | 77.4 | 76.5 | 76.9 | 76.4 | 74.7 |
| GLN   | 24.5 | 20.9 | 21.3 | 14.2 | 23.8 | 21.5 | 23.3 |
| ARG   | 22.1 | 19.9 | 19.9 | 7.9  | 22.0 | 16.9 | 19.9 |
| SER   | 68.3 | 67.4 | 67.7 | 62.8 | 69.0 | 68.7 | 67.3 |
| THR   | 91.3 | 89.7 | 90.2 | 86.7 | 90.9 | 90.5 | 89.7 |
| VAL   | 87.9 | 88.3 | 88.1 | 87.0 | 89.3 | 89.5 | 88.7 |
| TRP   | 71.1 | 64.8 | 59.4 | 26.6 | 54.7 | 51.6 | 64.8 |
| TYR   | 69.2 | 65.2 | 66.6 | 57.5 | 65.6 | 60.2 | 71.6 |
| Total | 56.5 | 54.3 | 55.0 | 48.3 | 55.3 | 53.9 | 55.6 |

**Table S13.** Protein side-chain packing results for 18 amino acid types in terms of  $\chi_{1-4}$  recovery rate on 379 perturbed backbones (RMSD = 0.57 Å) for the residues in three categories.

| Residue                 | $\chi_{1-4}$ recovery rate (%) |       |      |       |        |         |         |
|-------------------------|--------------------------------|-------|------|-------|--------|---------|---------|
|                         | FASPR                          | CISRR | RASP | SCATD | SCWRL4 | SCWRL4v | ABACUS2 |
| <b>All residues</b>     |                                |       |      |       |        |         |         |
| CYS                     | 82.7                           | 86.3  | 86.6 | 73.8  | 86.0   | 86.7    | 86.3    |
| ASP                     | 57.2                           | 54.8  | 56.1 | 50.4  | 58.7   | 56.6    | 56.8    |
| GLU                     | 25.9                           | 24.3  | 24.8 | 19.4  | 26.0   | 23.9    | 26.3    |
| PHE                     | 79.3                           | 77.6  | 74.9 | 68.4  | 75.1   | 71.3    | 79.5    |
| HIS                     | 55.9                           | 57.7  | 52.8 | 50.7  | 54.1   | 50.1    | 58.0    |
| ILE                     | 80.5                           | 79.6  | 77.8 | 76.0  | 79.4   | 78.5    | 80.5    |
| LYS                     | 30.5                           | 30.9  | 28.5 | 24.2  | 29.2   | 27.2    | 29.8    |
| LEU                     | 82.1                           | 79.6  | 77.8 | 76.6  | 79.3   | 77.2    | 80.8    |
| MET                     | 45.7                           | 45.9  | 42.8 | 33.7  | 42.5   | 39.6    | 43.4    |
| ASN                     | 54.3                           | 51.6  | 52.3 | 42.8  | 53.9   | 52.2    | 54.3    |
| PRO                     | 78.2                           | 76.2  | 78.3 | 75.5  | 77.6   | 75.8    | 76.1    |
| GLN                     | 28.6                           | 23.3  | 25.5 | 17.3  | 29.0   | 26.7    | 27.6    |
| ARG                     | 24.1                           | 23.3  | 21.8 | 12.7  | 26.0   | 21.6    | 24.6    |
| SER                     | 67.0                           | 66.3  | 66.6 | 63.0  | 68.2   | 67.6    | 67.0    |
| THR                     | 89.7                           | 87.0  | 88.7 | 86.8  | 89.2   | 88.7    | 89.3    |
| VAL                     | 92.4                           | 91.6  | 91.8 | 91.2  | 92.1   | 91.2    | 92.0    |
| TRP                     | 71.9                           | 69.4  | 63.9 | 44.8  | 63.9   | 60.2    | 76.1    |
| TYR                     | 76.3                           | 74.4  | 71.5 | 65.5  | 73.9   | 70.5    | 79.0    |
| Total                   | 65.8                           | 64.2  | 63.6 | 59.0  | 64.9   | 62.9    | 65.6    |
| <b>Core residues</b>    |                                |       |      |       |        |         |         |
| CYS                     | 85.1                           | 87.5  | 86.6 | 78.4  | 87.3   | 87.5    | 87.0    |
| ASP                     | 53.8                           | 54.0  | 54.4 | 50.5  | 58.5   | 54.8    | 54.0    |
| GLU                     | 32.7                           | 33.0  | 30.6 | 27.9  | 33.9   | 31.8    | 30.3    |
| PHE                     | 79.4                           | 80.6  | 76.1 | 71.4  | 77.9   | 72.9    | 82.4    |
| HIS                     | 53.4                           | 58.8  | 49.9 | 52.8  | 57.7   | 50.9    | 59.6    |
| ILE                     | 82.5                           | 81.9  | 78.9 | 79.0  | 81.5   | 80.3    | 82.0    |
| LYS                     | 36.2                           | 39.7  | 35.8 | 28.7  | 34.2   | 30.3    | 35.5    |
| LEU                     | 83.5                           | 80.8  | 78.3 | 78.5  | 81.0   | 78.3    | 81.3    |
| MET                     | 51.8                           | 53.3  | 49.7 | 42.3  | 53.9   | 50.1    | 52.0    |
| ASN                     | 57.3                           | 57.7  | 54.4 | 47.6  | 58.0   | 52.2    | 58.0    |
| PRO                     | 80.2                           | 76.9  | 79.5 | 78.6  | 79.0   | 76.9    | 78.5    |
| GLN                     | 36.2                           | 30.9  | 31.6 | 24.0  | 37.8   | 36.2    | 33.9    |
| ARG                     | 27.9                           | 31.1  | 26.0 | 23.7  | 34.8   | 26.5    | 36.4    |
| SER                     | 66.4                           | 64.7  | 64.0 | 62.6  | 67.3   | 66.4    | 66.7    |
| THR                     | 90.5                           | 87.6  | 89.5 | 87.8  | 89.4   | 89.1    | 90.1    |
| VAL                     | 93.7                           | 93.3  | 92.8 | 92.3  | 93.4   | 92.3    | 93.3    |
| TRP                     | 74.7                           | 73.2  | 66.7 | 51.6  | 68.7   | 67.2    | 82.6    |
| TYR                     | 78.0                           | 77.0  | 73.5 | 69.2  | 76.4   | 74.1    | 80.3    |
| Total                   | 75.5                           | 74.8  | 72.7 | 70.3  | 75.1   | 72.7    | 75.9    |
| <b>Surface residues</b> |                                |       |      |       |        |         |         |
| CYS                     | 75.4                           | 75.4  | 83.1 | 53.8  | 80.0   | 81.5    | 78.5    |
| ASP                     | 57.0                           | 55.0  | 55.1 | 49.2  | 57.0   | 55.3    | 55.3    |
| GLU                     | 21.8                           | 20.1  | 21.3 | 15.6  | 20.4   | 19.6    | 21.4    |
| PHE                     | 74.4                           | 64.8  | 65.9 | 54.9  | 62.5   | 61.1    | 67.6    |
| HIS                     | 54.9                           | 53.3  | 53.6 | 43.9  | 48.6   | 45.5    | 50.2    |
| ILE                     | 71.8                           | 72.2  | 71.2 | 66.4  | 71.8   | 72.2    | 72.2    |
| LYS                     | 27.0                           | 26.4  | 24.4 | 20.9  | 24.8   | 24.3    | 25.6    |

|       |      |      |      |      |      |      |      |
|-------|------|------|------|------|------|------|------|
| LEU   | 76.5 | 73.3 | 75.1 | 68.4 | 74.3 | 72.6 | 75.3 |
| MET   | 31.3 | 32.3 | 32.8 | 22.6 | 24.6 | 24.1 | 30.3 |
| ASN   | 51.4 | 47.5 | 50.5 | 39.3 | 50.2 | 49.8 | 51.5 |
| PRO   | 76.7 | 75.0 | 76.8 | 75.2 | 76.7 | 74.8 | 74.7 |
| GLN   | 24.4 | 19.4 | 20.9 | 13.2 | 21.8 | 20.9 | 21.1 |
| ARG   | 22.0 | 17.9 | 18.8 | 7.8  | 19.6 | 17.3 | 19.5 |
| SER   | 67.8 | 67.0 | 67.1 | 61.3 | 68.5 | 68.5 | 65.6 |
| THR   | 90.7 | 88.9 | 89.5 | 87.5 | 89.6 | 89.2 | 89.2 |
| VAL   | 87.9 | 87.6 | 87.8 | 87.0 | 88.1 | 87.6 | 87.6 |
| TRP   | 66.4 | 59.4 | 59.4 | 29.7 | 54.7 | 49.2 | 63.3 |
| TYR   | 65.2 | 63.2 | 64.2 | 55.9 | 64.2 | 58.5 | 68.9 |
| Total | 55.3 | 53.1 | 53.8 | 47.7 | 53.8 | 52.7 | 53.8 |

**Table S14.** Protein side-chain packing results for 18 amino acid types in terms of  $\chi_{1-4}$  recovery rate on 379 perturbed backbones (RMSD = 0.93 Å) for the residues in three categories.

| Residue                 | $\chi_{1-4}$ recovery rate (%) |       |      |       |        |         |         |
|-------------------------|--------------------------------|-------|------|-------|--------|---------|---------|
|                         | FASPR                          | CISRR | RASP | SCATD | SCWRL4 | SCWRL4v | ABACUS2 |
| <b>All residues</b>     |                                |       |      |       |        |         |         |
| CYS                     | 81.1                           | 82.0  | 84.0 | 72.9  | 82.5   | 82.7    | 79.6    |
| ASP                     | 54.8                           | 53.1  | 54.0 | 49.1  | 56.6   | 54.2    | 53.6    |
| GLU                     | 25.1                           | 22.0  | 22.4 | 18.1  | 25.4   | 22.6    | 24.3    |
| PHE                     | 73.7                           | 71.0  | 68.7 | 64.8  | 67.9   | 64.5    | 71.8    |
| HIS                     | 54.0                           | 53.5  | 49.2 | 48.4  | 52.1   | 47.9    | 53.8    |
| ILE                     | 75.8                           | 72.4  | 72.2 | 72.2  | 74.4   | 72.5    | 74.2    |
| LYS                     | 29.2                           | 28.7  | 26.1 | 22.6  | 26.7   | 25.3    | 26.6    |
| LEU                     | 78.9                           | 72.9  | 73.1 | 73.9  | 74.6   | 73.0    | 75.6    |
| MET                     | 39.4                           | 38.9  | 37.2 | 30.4  | 36.9   | 34.2    | 39.7    |
| ASN                     | 51.6                           | 48.8  | 48.8 | 41.7  | 49.4   | 47.8    | 49.8    |
| PRO                     | 76.1                           | 74.2  | 75.5 | 73.5  | 74.6   | 72.3    | 74.0    |
| GLN                     | 24.8                           | 22.1  | 23.0 | 16.9  | 25.9   | 23.9    | 25.0    |
| ARG                     | 21.8                           | 21.3  | 19.8 | 11.9  | 23.2   | 18.6    | 21.5    |
| SER                     | 64.7                           | 63.7  | 63.8 | 61.2  | 65.4   | 65.3    | 64.7    |
| THR                     | 88.4                           | 84.4  | 87.3 | 85.2  | 88.0   | 87.1    | 85.8    |
| VAL                     | 91.1                           | 88.6  | 89.3 | 89.6  | 89.6   | 89.0    | 88.7    |
| TRP                     | 67.3                           | 64.8  | 60.0 | 41.2  | 59.4   | 55.2    | 67.6    |
| TYR                     | 71.1                           | 70.4  | 67.7 | 62.2  | 68.6   | 66.2    | 73.6    |
| Total                   | 63.0                           | 60.4  | 60.3 | 57.0  | 61.5   | 59.5    | 61.5    |
| <b>Core residues</b>    |                                |       |      |       |        |         |         |
| CYS                     | 83.0                           | 83.4  | 84.3 | 78.3  | 83.7   | 83.4    | 80.2    |
| ASP                     | 48.9                           | 51.3  | 50.7 | 48.5  | 55.4   | 52.5    | 50.5    |
| GLU                     | 34.5                           | 28.2  | 25.5 | 27.0  | 31.8   | 26.1    | 29.7    |
| PHE                     | 73.7                           | 72.2  | 68.8 | 67.6  | 68.7   | 65.3    | 72.1    |
| HIS                     | 51.8                           | 55.0  | 49.3 | 47.7  | 53.9   | 49.9    | 56.9    |
| ILE                     | 76.7                           | 73.0  | 72.9 | 74.0  | 75.2   | 73.0    | 74.4    |
| LYS                     | 30.3                           | 31.6  | 25.7 | 22.8  | 27.0   | 24.8    | 24.1    |
| LEU                     | 79.1                           | 71.9  | 72.9 | 76.0  | 75.2   | 73.6    | 75.0    |
| MET                     | 44.4                           | 44.7  | 42.1 | 36.9  | 45.7   | 42.4    | 48.6    |
| ASN                     | 47.8                           | 49.3  | 45.8 | 42.3  | 46.7   | 43.6    | 50.2    |
| PRO                     | 76.0                           | 72.6  | 74.3 | 73.4  | 72.9   | 69.1    | 75.0    |
| GLN                     | 29.9                           | 26.3  | 25.0 | 21.7  | 29.9   | 26.6    | 28.6    |
| ARG                     | 24.7                           | 28.1  | 23.3 | 21.9  | 30.6   | 23.7    | 27.6    |
| SER                     | 62.4                           | 60.6  | 60.9 | 59.8  | 62.8   | 62.9    | 64.9    |
| THR                     | 89.2                           | 85.0  | 87.4 | 86.3  | 87.8   | 87.1    | 88.1    |
| VAL                     | 92.2                           | 89.4  | 89.8 | 90.5  | 89.9   | 89.7    | 89.7    |
| TRP                     | 71.2                           | 69.7  | 64.0 | 46.9  | 67.0   | 61.3    | 73.2    |
| TYR                     | 72.2                           | 73.4  | 69.7 | 65.1  | 70.9   | 68.5    | 74.6    |
| Total                   | 71.4                           | 68.8  | 68.0 | 67.1  | 69.8   | 67.7    | 70.2    |
| <b>Surface residues</b> |                                |       |      |       |        |         |         |
| CYS                     | 72.3                           | 80.0  | 78.5 | 55.4  | 76.9   | 76.9    | 81.5    |
| ASP                     | 55.3                           | 53.2  | 54.0 | 48.1  | 55.7   | 53.5    | 52.9    |
| GLU                     | 21.3                           | 18.8  | 20.0 | 14.8  | 20.4   | 18.7    | 20.8    |
| PHE                     | 69.6                           | 61.1  | 65.2 | 53.9  | 59.0   | 56.3    | 64.5    |
| HIS                     | 52.7                           | 51.1  | 47.3 | 45.5  | 46.4   | 43.6    | 46.1    |
| ILE                     | 68.9                           | 68.9  | 67.2 | 65.8  | 69.5   | 69.3    | 69.7    |
| LYS                     | 26.0                           | 25.4  | 23.7 | 21.3  | 24.0   | 23.6    | 25.4    |



|       |      |      |      |      |      |      |      |
|-------|------|------|------|------|------|------|------|
| LEU   | 74.4 | 72.1 | 72.3 | 65.8 | 72.9 | 72.0 | 74.4 |
| MET   | 28.7 | 26.7 | 28.7 | 20.5 | 22.6 | 23.1 | 27.7 |
| ASN   | 51.6 | 46.2 | 48.8 | 39.5 | 48.3 | 48.1 | 49.3 |
| PRO   | 74.2 | 73.4 | 75.9 | 73.7 | 74.0 | 72.7 | 73.4 |
| GLN   | 20.4 | 19.5 | 20.2 | 13.2 | 21.2 | 20.4 | 20.8 |
| ARG   | 21.6 | 17.2 | 18.6 | 8.2  | 18.7 | 15.2 | 18.0 |
| SER   | 66.9 | 66.3 | 66.2 | 61.0 | 67.1 | 67.6 | 64.7 |
| THR   | 90.1 | 87.3 | 88.5 | 85.8 | 89.0 | 88.6 | 87.3 |
| VAL   | 87.2 | 85.6 | 85.5 | 85.8 | 87.6 | 86.1 | 86.2 |
| TRP   | 64.1 | 58.6 | 57.0 | 28.1 | 52.3 | 50.8 | 54.7 |
| TYR   | 63.2 | 60.9 | 61.2 | 54.2 | 59.2 | 54.2 | 66.9 |
| Total | 53.9 | 51.7 | 52.3 | 46.9 | 52.5 | 51.3 | 52.3 |

**Table S15.** Protein side-chain packing results for 18 amino acid types in terms of  $\chi_{1-4}$  recovery rate on 379 perturbed backbones (RMSD = 1.48 Å) for the residues in three categories.

| Residue                 | $\chi_{1-4}$ recovery rate (%) |       |      |       |        |         |         |
|-------------------------|--------------------------------|-------|------|-------|--------|---------|---------|
|                         | FASPR                          | CISRR | RASP | SCATD | SCWRL4 | SCWRL4v | ABACUS2 |
| <b>All residues</b>     |                                |       |      |       |        |         |         |
| CYS                     | 75.8                           | 77.9  | 77.5 | 67.2  | 78.2   | 78.3    | 72.4    |
| ASP                     | 52.7                           | 50.1  | 52.1 | 47.1  | 53.2   | 53.8    | 50.6    |
| GLU                     | 22.3                           | 20.7  | 20.6 | 17.2  | 23.3   | 23.7    | 20.2    |
| PHE                     | 65.2                           | 62.9  | 62.6 | 60.1  | 59.8   | 60.3    | 61.7    |
| HIS                     | 50.0                           | 48.6  | 43.1 | 44.5  | 46.4   | 46.6    | 46.0    |
| ILE                     | 69.6                           | 64.9  | 65.4 | 66.1  | 66.8   | 66.8    | 66.7    |
| LYS                     | 25.3                           | 25.7  | 23.8 | 20.7  | 24.3   | 24.5    | 24.5    |
| LEU                     | 73.9                           | 64.5  | 65.3 | 69.3  | 67.3   | 67.5    | 67.0    |
| MET                     | 32.6                           | 31.6  | 30.7 | 25.2  | 30.1   | 30.3    | 27.8    |
| ASN                     | 47.3                           | 44.6  | 45.4 | 39.2  | 47.4   | 48.1    | 46.1    |
| PRO                     | 74.1                           | 68.5  | 72.4 | 71.6  | 71.8   | 71.8    | 69.6    |
| GLN                     | 23.4                           | 19.5  | 19.8 | 15.0  | 23.6   | 23.9    | 22.4    |
| ARG                     | 18.1                           | 16.9  | 17.0 | 10.3  | 19.4   | 19.6    | 16.8    |
| SER                     | 63.2                           | 61.1  | 61.4 | 59.4  | 62.5   | 62.6    | 61.2    |
| THR                     | 86.3                           | 79.6  | 83.5 | 83.1  | 83.9   | 84.0    | 80.7    |
| VAL                     | 87.3                           | 81.0  | 85.0 | 85.8  | 84.3   | 84.3    | 82.0    |
| TRP                     | 56.1                           | 52.7  | 48.2 | 35.4  | 50.5   | 51.1    | 55.1    |
| TYR                     | 66.2                           | 63.3  | 59.4 | 58.5  | 61.1   | 62.0    | 64.3    |
| Total                   | 58.9                           | 54.9  | 55.6 | 53.8  | 56.6   | 56.9    | 55.5    |
| <b>Core residues</b>    |                                |       |      |       |        |         |         |
| CYS                     | 77.1                           | 80.0  | 79.0 | 71.3  | 78.1   | 78.1    | 72.4    |
| ASP                     | 43.8                           | 44.6  | 45.2 | 44.2  | 47.3   | 48.3    | 41.5    |
| GLU                     | 25.8                           | 23.7  | 23.4 | 22.2  | 30.3   | 30.3    | 21.6    |
| PHE                     | 64.7                           | 62.3  | 60.6 | 60.7  | 59.3   | 59.9    | 60.7    |
| HIS                     | 47.2                           | 44.4  | 39.8 | 43.4  | 47.7   | 47.7    | 46.1    |
| ILE                     | 69.5                           | 64.5  | 64.8 | 65.6  | 66.6   | 66.7    | 66.2    |
| LYS                     | 27.0                           | 28.3  | 27.0 | 21.5  | 26.4   | 26.7    | 27.0    |
| LEU                     | 72.9                           | 62.2  | 63.5 | 70.4  | 65.8   | 66.1    | 64.8    |
| MET                     | 34.6                           | 32.3  | 34.2 | 28.7  | 34.8   | 35.0    | 31.5    |
| ASN                     | 42.3                           | 43.4  | 42.0 | 38.5  | 44.2   | 44.9    | 41.8    |
| PRO                     | 73.3                           | 63.5  | 68.1 | 70.7  | 69.4   | 69.4    | 64.9    |
| GLN                     | 24.3                           | 18.1  | 19.4 | 17.4  | 23.0   | 23.4    | 19.7    |
| ARG                     | 18.2                           | 19.6  | 18.9 | 15.9  | 21.7   | 21.9    | 20.5    |
| SER                     | 59.2                           | 54.3  | 55.1 | 56.1  | 57.1   | 57.2    | 56.3    |
| THR                     | 84.9                           | 76.1  | 80.6 | 79.7  | 81.1   | 81.1    | 76.4    |
| VAL                     | 87.5                           | 80.6  | 84.6 | 86.0  | 84.1   | 84.1    | 81.1    |
| TRP                     | 56.6                           | 57.6  | 51.1 | 38.7  | 53.8   | 55.1    | 58.6    |
| TYR                     | 67.4                           | 63.6  | 59.8 | 59.8  | 62.1   | 63.1    | 66.0    |
| Total                   | 65.3                           | 60.2  | 60.9 | 61.5  | 62.3   | 62.6    | 60.8    |
| <b>Surface residues</b> |                                |       |      |       |        |         |         |
| CYS                     | 67.7                           | 63.1  | 72.3 | 50.8  | 76.9   | 78.5    | 64.6    |
| ASP                     | 55.2                           | 52.1  | 54.2 | 47.7  | 54.1   | 54.5    | 52.4    |
| GLU                     | 20.2                           | 19.1  | 19.0 | 14.8  | 18.9   | 19.2    | 17.9    |
| PHE                     | 67.6                           | 61.1  | 64.8 | 52.2  | 57.0   | 57.3    | 60.1    |
| HIS                     | 49.2                           | 48.9  | 46.7 | 40.8  | 43.6   | 43.6    | 40.8    |
| ILE                     | 67.8                           | 66.6  | 67.0 | 66.0  | 66.8   | 66.8    | 66.0    |
| LYS                     | 24.4                           | 23.9  | 23.1 | 18.1  | 22.7   | 23.1    | 23.2    |

|       |      |      |      |      |      |      |      |
|-------|------|------|------|------|------|------|------|
| LEU   | 74.9 | 69.5 | 69.6 | 66.7 | 71.5 | 71.5 | 70.4 |
| MET   | 25.6 | 27.2 | 28.7 | 20.0 | 23.1 | 23.6 | 25.1 |
| ASN   | 48.8 | 43.8 | 47.0 | 38.5 | 48.1 | 48.7 | 48.4 |
| PRO   | 74.1 | 71.8 | 74.3 | 72.7 | 72.6 | 72.8 | 71.2 |
| GLN   | 20.9 | 17.7 | 19.1 | 12.1 | 21.1 | 21.3 | 19.7 |
| ARG   | 18.0 | 15.2 | 17.1 | 7.6  | 17.6 | 17.6 | 16.6 |
| SER   | 66.7 | 66.0 | 65.4 | 61.0 | 65.6 | 65.7 | 64.3 |
| THR   | 88.4 | 84.8 | 86.4 | 85.8 | 87.1 | 87.2 | 84.4 |
| VAL   | 85.0 | 82.5 | 85.2 | 84.5 | 84.7 | 84.7 | 82.8 |
| TRP   | 55.5 | 44.5 | 42.2 | 24.2 | 46.9 | 46.9 | 50.0 |
| TYR   | 58.9 | 56.9 | 53.5 | 53.5 | 52.2 | 52.5 | 56.9 |
| Total | 52.5 | 50.0 | 51.0 | 46.1 | 50.9 | 51.1 | 50.0 |

**Table S16.** Protein side-chain packing results for 18 amino acid types in terms of  $\chi_{1-4}$  recovery rate on 379 perturbed backbones (RMSD = 1.88 Å) for the residues in three categories.

| Residue                 | $\chi_{1-4}$ recovery rate (%) |       |      |       |        |         |         |
|-------------------------|--------------------------------|-------|------|-------|--------|---------|---------|
|                         | FASPR                          | CISRR | RASP | SCATD | SCWRL4 | SCWRL4v | ABACUS2 |
| <b>All residues</b>     |                                |       |      |       |        |         |         |
| CYS                     | 74.5                           | 72.9  | 75.1 | 66.9  | 76.5   | 75.1    | 69.4    |
| ASP                     | 52.1                           | 48.4  | 50.3 | 47.5  | 52.5   | 50.5    | 49.5    |
| GLU                     | 20.7                           | 19.0  | 19.8 | 16.1  | 20.0   | 19.1    | 20.1    |
| PHE                     | 62.9                           | 58.6  | 59.9 | 57.2  | 54.5   | 51.9    | 57.9    |
| HIS                     | 48.1                           | 45.9  | 43.9 | 43.7  | 45.1   | 41.9    | 45.0    |
| ILE                     | 67.4                           | 60.8  | 62.6 | 64.0  | 63.8   | 63.0    | 63.2    |
| LYS                     | 25.0                           | 24.5  | 22.6 | 21.5  | 23.8   | 22.1    | 22.8    |
| LEU                     | 71.6                           | 59.6  | 63.0 | 67.2  | 64.0   | 63.9    | 63.1    |
| MET                     | 30.9                           | 30.4  | 30.0 | 25.0  | 27.4   | 25.7    | 27.6    |
| ASN                     | 45.4                           | 41.6  | 43.2 | 37.2  | 44.0   | 42.0    | 42.7    |
| PRO                     | 73.1                           | 68.7  | 72.6 | 71.4  | 70.6   | 70.4    | 68.3    |
| GLN                     | 21.8                           | 17.3  | 18.9 | 13.7  | 21.5   | 19.2    | 19.3    |
| ARG                     | 16.0                           | 14.8  | 14.9 | 9.1   | 16.9   | 13.8    | 14.5    |
| SER                     | 61.7                           | 59.3  | 61.2 | 57.8  | 62.5   | 62.5    | 59.9    |
| THR                     | 84.3                           | 77.0  | 82.4 | 80.9  | 82.9   | 82.4    | 78.0    |
| VAL                     | 87.2                           | 80.4  | 84.4 | 85.3  | 83.4   | 82.8    | 79.9    |
| TRP                     | 54.0                           | 49.5  | 45.2 | 33.3  | 44.8   | 43.0    | 48.7    |
| TYR                     | 60.0                           | 57.6  | 55.6 | 54.3  | 56.8   | 54.1    | 57.8    |
| Total                   | 57.2                           | 52.3  | 54.1 | 52.4  | 54.4   | 53.2    | 52.9    |
| <b>Core residues</b>    |                                |       |      |       |        |         |         |
| CYS                     | 75.6                           | 73.2  | 75.8 | 71.3  | 77.3   | 75.2    | 69.6    |
| ASP                     | 42.6                           | 41.5  | 39.9 | 44.8  | 45.8   | 42.8    | 41.1    |
| GLU                     | 21.6                           | 18.6  | 20.1 | 18.3  | 21.6   | 18.3    | 21.0    |
| PHE                     | 61.4                           | 55.9  | 58.3 | 57.3  | 52.7   | 50.7    | 56.9    |
| HIS                     | 43.9                           | 44.7  | 43.4 | 40.4  | 42.8   | 41.5    | 42.3    |
| ILE                     | 67.3                           | 59.6  | 61.5 | 64.3  | 63.1   | 62.3    | 62.8    |
| LYS                     | 25.7                           | 24.1  | 22.8 | 22.5  | 20.2   | 21.8    | 22.5    |
| LEU                     | 70.3                           | 56.0  | 60.2 | 67.6  | 61.4   | 61.8    | 60.3    |
| MET                     | 31.4                           | 32.7  | 31.4 | 28.1  | 30.0   | 27.7    | 28.9    |
| ASN                     | 40.7                           | 38.7  | 38.3 | 35.8  | 40.7   | 38.7    | 36.7    |
| PRO                     | 73.6                           | 66.7  | 72.0 | 71.7  | 69.6   | 69.4    | 66.8    |
| GLN                     | 21.7                           | 16.1  | 19.4 | 14.1  | 22.0   | 19.7    | 20.1    |
| ARG                     | 15.9                           | 17.5  | 14.3 | 13.8  | 17.7   | 15.0    | 17.1    |
| SER                     | 58.6                           | 53.1  | 56.7 | 56.0  | 58.6   | 59.3    | 57.4    |
| THR                     | 80.2                           | 70.6  | 77.6 | 78.2  | 79.1   | 78.0    | 72.2    |
| VAL                     | 87.5                           | 79.3  | 83.9 | 85.6  | 83.0   | 82.0    | 78.8    |
| TRP                     | 54.8                           | 51.1  | 47.4 | 38.0  | 48.9   | 48.6    | 52.4    |
| TYR                     | 58.3                           | 55.2  | 53.9 | 53.9  | 54.8   | 52.3    | 58.2    |
| Total                   | 63.0                           | 56.2  | 58.6 | 59.8  | 59.0   | 58.0    | 57.6    |
| <b>Surface residues</b> |                                |       |      |       |        |         |         |
| CYS                     | 67.7                           | 70.8  | 73.8 | 58.5  | 67.7   | 70.8    | 69.2    |
| ASP                     | 54.4                           | 51.6  | 52.5 | 48.2  | 54.1   | 52.4    | 51.0    |
| GLU                     | 19.1                           | 18.7  | 18.8 | 14.6  | 17.7   | 17.4    | 18.5    |
| PHE                     | 65.5                           | 58.7  | 60.1 | 49.5  | 54.6   | 51.9    | 56.3    |
| HIS                     | 50.5                           | 47.6  | 48.3 | 44.2  | 46.4   | 45.1    | 42.0    |
| ILE                     | 63.7                           | 62.0  | 61.4 | 61.4  | 65.8   | 63.7    | 62.8    |
| LYS                     | 23.7                           | 23.5  | 21.0 | 19.4  | 23.2   | 21.3    | 21.5    |

|       |      |      |      |      |      |      |      |
|-------|------|------|------|------|------|------|------|
| LEU   | 71.9 | 68.2 | 69.1 | 64.1 | 68.6 | 67.8 | 67.4 |
| MET   | 27.7 | 28.2 | 26.7 | 20.0 | 21.5 | 22.1 | 23.6 |
| ASN   | 48.3 | 42.1 | 46.1 | 38.5 | 46.4 | 44.4 | 45.6 |
| PRO   | 72.1 | 69.1 | 73.1 | 71.9 | 71.0 | 70.6 | 69.1 |
| GLN   | 20.8 | 17.6 | 18.5 | 12.0 | 19.9 | 17.6 | 17.4 |
| ARG   | 16.4 | 14.4 | 16.0 | 7.3  | 15.5 | 13.3 | 13.5 |
| SER   | 64.3 | 63.8 | 63.1 | 59.3 | 64.4 | 64.2 | 61.6 |
| THR   | 88.1 | 83.2 | 85.7 | 84.1 | 85.8 | 85.5 | 82.7 |
| VAL   | 85.9 | 81.3 | 83.9 | 83.8 | 83.9 | 83.3 | 82.4 |
| TRP   | 60.9 | 49.2 | 44.5 | 23.4 | 43.8 | 35.2 | 46.1 |
| TYR   | 57.5 | 53.2 | 52.5 | 52.8 | 55.2 | 52.2 | 52.8 |
| Total | 51.4 | 48.7 | 49.7 | 45.5 | 49.8 | 48.6 | 48.1 |

**Table S17.** Protein side-chain packing results for 18 amino acid types in terms of  $\chi_{1-4}$  recovery rate on 379 perturbed backbones (RMSD = 2.38 Å) for the residues in three categories.

| Residue                 | $\chi_{1-4}$ recovery rate (%) |       |      |       |        |         |         |
|-------------------------|--------------------------------|-------|------|-------|--------|---------|---------|
|                         | FASPR                          | CISRR | RASP | SCATD | SCWRL4 | SCWRL4v | ABACUS2 |
| <b>All residues</b>     |                                |       |      |       |        |         |         |
| CYS                     | 71.4                           | 69.5  | 70.6 | 63.9  | 72.5   | 72.1    | 64.1    |
| ASP                     | 50.1                           | 47.2  | 48.2 | 45.2  | 49.7   | 47.8    | 46.6    |
| GLU                     | 20.3                           | 19.5  | 18.9 | 15.7  | 20.4   | 19.3    | 19.6    |
| PHE                     | 58.5                           | 56.1  | 54.9 | 54.2  | 51.6   | 47.9    | 53.5    |
| HIS                     | 46.0                           | 44.6  | 39.6 | 40.1  | 42.8   | 39.2    | 41.4    |
| ILE                     | 63.2                           | 57.3  | 58.6 | 60.6  | 60.2   | 58.7    | 59.0    |
| LYS                     | 22.8                           | 22.6  | 20.5 | 20.0  | 21.5   | 20.6    | 21.3    |
| LEU                     | 68.1                           | 55.6  | 59.5 | 64.9  | 61.0   | 60.8    | 59.3    |
| MET                     | 27.2                           | 24.6  | 23.7 | 21.6  | 22.7   | 22.3    | 23.8    |
| ASN                     | 45.9                           | 40.6  | 42.7 | 36.5  | 41.8   | 41.3    | 41.6    |
| PRO                     | 72.8                           | 67.2  | 71.8 | 69.7  | 69.8   | 69.9    | 68.5    |
| GLN                     | 20.3                           | 15.9  | 19.6 | 13.5  | 20.7   | 18.3    | 18.0    |
| ARG                     | 15.9                           | 13.8  | 14.4 | 9.8   | 15.3   | 13.7    | 14.1    |
| SER                     | 59.9                           | 57.8  | 59.0 | 57.4  | 60.1   | 60.8    | 57.3    |
| THR                     | 84.0                           | 73.8  | 80.4 | 81.1  | 81.3   | 80.4    | 75.8    |
| VAL                     | 84.0                           | 76.3  | 81.8 | 82.4  | 81.3   | 80.6    | 76.1    |
| TRP                     | 47.9                           | 44.5  | 40.1 | 32.7  | 41.3   | 37.2    | 43.7    |
| TYR                     | 57.9                           | 54.7  | 52.6 | 52.6  | 53.4   | 51.8    | 54.0    |
| Total                   | 55.0                           | 49.8  | 51.6 | 50.7  | 52.1   | 51.0    | 50.2    |
| <b>Core residues</b>    |                                |       |      |       |        |         |         |
| CYS                     | 72.4                           | 66.7  | 68.4 | 66.2  | 70.3   | 69.9    | 61.2    |
| ASP                     | 42.6                           | 40.7  | 40.9 | 40.9  | 44.2   | 41.8    | 37.9    |
| GLU                     | 18.3                           | 15.3  | 16.5 | 15.6  | 19.8   | 17.4    | 14.4    |
| PHE                     | 57.4                           | 55.2  | 51.9 | 54.3  | 49.0   | 45.9    | 52.4    |
| HIS                     | 42.3                           | 42.3  | 36.3 | 34.7  | 42.8   | 38.5    | 38.2    |
| ILE                     | 60.7                           | 54.0  | 55.8 | 59.3  | 57.4   | 55.7    | 56.2    |
| LYS                     | 17.6                           | 18.2  | 15.3 | 20.5  | 17.9   | 17.9    | 17.9    |
| LEU                     | 66.8                           | 52.1  | 56.6 | 64.9  | 58.4   | 58.3    | 55.9    |
| MET                     | 28.7                           | 25.0  | 25.6 | 23.7  | 25.4   | 24.7    | 26.4    |
| ASN                     | 39.8                           | 36.5  | 39.6 | 36.5  | 36.3   | 37.2    | 36.1    |
| PRO                     | 72.6                           | 64.2  | 69.6 | 67.7  | 67.7   | 67.4    | 65.8    |
| GLN                     | 20.4                           | 16.4  | 20.4 | 18.1  | 20.4   | 17.8    | 15.1    |
| ARG                     | 17.3                           | 13.4  | 14.3 | 13.8  | 16.6   | 14.5    | 13.6    |
| SER                     | 56.4                           | 52.1  | 54.1 | 55.7  | 55.7   | 55.4    | 52.5    |
| THR                     | 80.1                           | 67.4  | 77.1 | 78.4  | 78.4   | 76.7    | 69.5    |
| VAL                     | 83.8                           | 74.9  | 81.2 | 81.2  | 80.6   | 79.8    | 74.8    |
| TRP                     | 44.9                           | 41.7  | 37.7 | 36.0  | 38.2   | 35.5    | 44.9    |
| TYR                     | 56.1                           | 54.8  | 51.8 | 51.8  | 51.5   | 51.3    | 53.3    |
| Total                   | 59.7                           | 52.6  | 55.0 | 56.9  | 55.7   | 54.5    | 53.1    |
| <b>Surface residues</b> |                                |       |      |       |        |         |         |
| CYS                     | 64.6                           | 72.3  | 72.3 | 53.8  | 69.2   | 70.8    | 66.2    |
| ASP                     | 53.3                           | 50.5  | 51.7 | 46.6  | 52.3   | 50.9    | 49.1    |
| GLU                     | 19.6                           | 19.0  | 17.9 | 13.9  | 18.1   | 17.1    | 17.8    |
| PHE                     | 58.7                           | 56.3  | 56.7 | 47.8  | 54.6   | 49.5    | 56.0    |
| HIS                     | 48.9                           | 49.2  | 44.5 | 42.9  | 43.9   | 40.8    | 42.6    |
| ILE                     | 66.4                           | 63.5  | 63.0 | 62.6  | 65.3   | 64.3    | 64.1    |
| LYS                     | 22.1                           | 21.9  | 20.2 | 18.4  | 21.3   | 20.8    | 21.1    |

|       |      |      |      |      |      |      |      |
|-------|------|------|------|------|------|------|------|
| LEU   | 69.5 | 63.6 | 66.3 | 64.9 | 66.5 | 65.3 | 64.4 |
| MET   | 20.5 | 23.1 | 20.5 | 19.0 | 19.0 | 18.5 | 23.6 |
| ASN   | 48.4 | 41.2 | 46.8 | 37.7 | 45.0 | 44.5 | 45.8 |
| PRO   | 72.5 | 68.9 | 72.6 | 71.4 | 71.2 | 70.9 | 69.3 |
| GLN   | 20.4 | 17.0 | 19.8 | 11.2 | 19.2 | 16.3 | 18.1 |
| ARG   | 15.9 | 13.8 | 14.4 | 8.2  | 14.2 | 13.3 | 13.8 |
| SER   | 63.3 | 62.5 | 62.6 | 58.8 | 64.1 | 65.3 | 61.8 |
| THR   | 87.9 | 81.4 | 84.5 | 85.6 | 85.3 | 84.9 | 82.6 |
| VAL   | 85.6 | 80.8 | 82.5 | 83.2 | 83.6 | 83.5 | 80.7 |
| TRP   | 53.9 | 47.7 | 43.8 | 28.1 | 46.1 | 38.3 | 43.0 |
| TYR   | 55.5 | 52.8 | 49.8 | 48.8 | 53.8 | 49.8 | 53.5 |
| Total | 50.6 | 47.7 | 48.7 | 45.1 | 49.0 | 48.0 | 47.7 |

**Table S18.** Protein side-chain packing results for 18 amino acid types in terms of  $\chi_{1-4}$  recovery rate on 379 perturbed backbones (RMSD = 2.55 Å) for the residues in three categories.

| Residue                 | $\chi_{1-4}$ recovery rate (%) |       |      |       |        |         |         |
|-------------------------|--------------------------------|-------|------|-------|--------|---------|---------|
|                         | FASPR                          | CISRR | RASP | SCATD | SCWRL4 | SCWRL4v | ABACUS2 |
| <b>All residues</b>     |                                |       |      |       |        |         |         |
| CYS                     | 70.9                           | 66.1  | 68.5 | 62.4  | 71.0   | 70.2    | 62.9    |
| ASP                     | 49.0                           | 45.2  | 47.1 | 44.6  | 49.0   | 47.1    | 45.0    |
| GLU                     | 18.1                           | 17.6  | 17.4 | 14.9  | 19.5   | 17.3    | 18.6    |
| PHE                     | 56.1                           | 54.0  | 54.1 | 52.2  | 50.2   | 47.4    | 49.0    |
| HIS                     | 43.5                           | 43.5  | 36.6 | 39.4  | 40.1   | 36.2    | 40.7    |
| ILE                     | 62.9                           | 55.0  | 57.4 | 59.3  | 58.4   | 57.4    | 57.8    |
| LYS                     | 22.4                           | 21.2  | 21.1 | 20.1  | 21.5   | 20.1    | 20.1    |
| LEU                     | 67.4                           | 54.4  | 58.7 | 63.7  | 58.9   | 58.9    | 59.7    |
| MET                     | 22.3                           | 22.6  | 23.5 | 18.6  | 22.0   | 19.0    | 20.5    |
| ASN                     | 43.0                           | 39.2  | 40.0 | 35.1  | 42.0   | 40.2    | 40.6    |
| PRO                     | 72.2                           | 66.1  | 70.0 | 68.5  | 68.2   | 67.8    | 66.0    |
| GLN                     | 20.0                           | 15.3  | 17.2 | 13.4  | 19.3   | 18.1    | 16.9    |
| ARG                     | 14.5                           | 14.0  | 14.1 | 9.5   | 14.8   | 12.9    | 12.6    |
| SER                     | 58.9                           | 57.7  | 57.9 | 57.3  | 59.9   | 60.4    | 56.0    |
| THR                     | 82.8                           | 72.9  | 79.1 | 80.2  | 80.2   | 79.9    | 74.1    |
| VAL                     | 84.8                           | 76.4  | 81.7 | 82.9  | 81.3   | 80.6    | 76.8    |
| TRP                     | 45.6                           | 39.1  | 39.8 | 31.0  | 38.1   | 36.1    | 41.8    |
| TYR                     | 56.3                           | 51.3  | 50.8 | 51.4  | 51.5   | 49.0    | 51.5    |
| Total                   | 53.9                           | 48.5  | 50.5 | 49.9  | 51.0   | 49.8    | 49.0    |
| <b>Core residues</b>    |                                |       |      |       |        |         |         |
| CYS                     | 71.8                           | 65.0  | 67.1 | 66.0  | 70.7   | 69.4    | 61.1    |
| ASP                     | 40.3                           | 37.7  | 35.4 | 38.1  | 40.1   | 38.1    | 34.6    |
| GLU                     | 17.4                           | 17.7  | 15.6 | 17.4  | 19.8   | 18.3    | 20.1    |
| PHE                     | 54.5                           | 52.0  | 51.0 | 52.1  | 48.7   | 45.6    | 49.2    |
| HIS                     | 38.8                           | 37.4  | 31.2 | 34.7  | 35.5   | 33.3    | 36.0    |
| ILE                     | 60.4                           | 51.6  | 54.9 | 58.2  | 55.7   | 55.0    | 55.3    |
| LYS                     | 17.6                           | 16.6  | 16.6 | 16.6  | 16.9   | 17.9    | 16.0    |
| LEU                     | 64.5                           | 48.7  | 54.5 | 61.7  | 55.0   | 54.9    | 53.8    |
| MET                     | 22.0                           | 21.8  | 23.7 | 19.9  | 23.7   | 19.9    | 21.4    |
| ASN                     | 37.8                           | 34.3  | 32.3 | 32.3  | 33.2   | 30.8    | 33.0    |
| PRO                     | 71.9                           | 63.2  | 66.1 | 65.8  | 63.7   | 64.2    | 62.8    |
| GLN                     | 16.1                           | 11.5  | 15.1 | 15.1  | 14.8   | 15.8    | 13.5    |
| ARG                     | 14.7                           | 12.7  | 11.5 | 12.7  | 14.1   | 13.8    | 14.3    |
| SER                     | 52.1                           | 49.8  | 50.3 | 53.6  | 51.4   | 52.8    | 49.5    |
| THR                     | 79.1                           | 64.5  | 72.9 | 74.4  | 74.4   | 74.1    | 66.9    |
| VAL                     | 84.7                           | 74.5  | 80.5 | 81.6  | 80.1   | 79.0    | 74.7    |
| TRP                     | 46.2                           | 39.5  | 38.5 | 32.8  | 39.0   | 39.5    | 42.2    |
| TYR                     | 55.7                           | 50.5  | 49.3 | 50.1  | 48.5   | 48.4    | 51.0    |
| Total                   | 58.2                           | 50.2  | 52.8 | 55.0  | 53.4   | 52.6    | 51.4    |
| <b>Surface residues</b> |                                |       |      |       |        |         |         |
| CYS                     | 70.8                           | 69.2  | 78.5 | 52.3  | 75.4   | 75.4    | 66.2    |
| ASP                     | 51.9                           | 48.6  | 50.0 | 46.1  | 51.4   | 49.5    | 48.3    |
| GLU                     | 18.1                           | 17.1  | 17.6 | 13.2  | 17.6   | 16.5    | 17.3    |
| PHE                     | 58.7                           | 57.0  | 58.0 | 47.8  | 51.2   | 49.1    | 50.9    |
| HIS                     | 47.3                           | 47.3  | 41.4 | 41.4  | 40.8   | 38.9    | 41.1    |
| ILE                     | 65.6                           | 62.8  | 62.2 | 61.2  | 63.5   | 62.8    | 63.5    |
| LYS                     | 22.1                           | 21.0  | 20.8 | 18.5  | 21.0   | 19.8    | 21.3    |



|       |      |      |      |      |      |      |      |
|-------|------|------|------|------|------|------|------|
| LEU   | 72.6 | 67.7 | 69.1 | 67.0 | 68.7 | 67.2 | 69.7 |
| MET   | 21.5 | 22.6 | 24.6 | 17.4 | 18.5 | 17.4 | 19.5 |
| ASN   | 46.9 | 42.1 | 44.5 | 38.0 | 45.3 | 43.9 | 45.0 |
| PRO   | 72.9 | 68.7 | 72.2 | 70.7 | 71.1 | 69.9 | 69.1 |
| GLN   | 20.4 | 17.3 | 17.4 | 13.1 | 17.9 | 18.1 | 15.8 |
| ARG   | 14.9 | 13.9 | 15.1 | 7.4  | 13.9 | 12.8 | 12.1 |
| SER   | 64.2 | 63.6 | 62.5 | 60.3 | 65.6 | 66.2 | 59.6 |
| THR   | 87.3 | 81.8 | 84.4 | 85.7 | 86.2 | 85.8 | 81.1 |
| VAL   | 83.8 | 80.4 | 82.2 | 84.5 | 82.4 | 82.2 | 80.4 |
| TRP   | 50.8 | 45.3 | 43.8 | 23.4 | 41.4 | 32.0 | 45.3 |
| TYR   | 53.8 | 53.5 | 49.2 | 52.8 | 52.2 | 46.8 | 49.5 |
| Total | 50.2 | 47.6 | 48.4 | 45.3 | 48.7 | 47.7 | 46.9 |

**Table S19.** Protein side-chain packing results for 18 amino acid types in terms of  $\chi_{1-4}$  recovery rate on 379 perturbed backbones (RMSD = 2.74 Å) for the residues in three categories.

| Residue                 | $\chi_{1-4}$ recovery rate (%) |       |      |       |        |         |         |
|-------------------------|--------------------------------|-------|------|-------|--------|---------|---------|
|                         | FASPR                          | CISRR | RASP | SCATD | SCWRL4 | SCWRL4v | ABACUS2 |
| <b>All residues</b>     |                                |       |      |       |        |         |         |
| CYS                     | 71.4                           | 63.7  | 66.9 | 64.0  | 69.3   | 68.6    | 60.0    |
| ASP                     | 48.8                           | 46.5  | 47.3 | 44.0  | 49.5   | 46.9    | 45.3    |
| GLU                     | 18.5                           | 17.3  | 17.7 | 14.9  | 18.7   | 17.3    | 17.5    |
| PHE                     | 52.8                           | 50.4  | 52.4 | 51.2  | 47.0   | 45.0    | 48.4    |
| HIS                     | 44.0                           | 42.4  | 39.3 | 38.4  | 39.9   | 36.1    | 39.6    |
| ILE                     | 59.5                           | 53.4  | 55.2 | 57.7  | 56.9   | 55.9    | 56.0    |
| LYS                     | 20.8                           | 20.2  | 18.5 | 18.5  | 19.5   | 18.5    | 19.5    |
| LEU                     | 65.7                           | 51.2  | 56.2 | 61.7  | 57.3   | 56.4    | 56.8    |
| MET                     | 22.2                           | 21.6  | 21.8 | 21.2  | 21.7   | 19.9    | 18.8    |
| ASN                     | 43.5                           | 38.4  | 40.8 | 35.5  | 40.7   | 39.2    | 39.6    |
| PRO                     | 72.1                           | 67.0  | 71.3 | 69.3  | 69.2   | 69.2    | 67.3    |
| GLN                     | 18.1                           | 15.9  | 17.5 | 12.7  | 19.0   | 17.2    | 17.2    |
| ARG                     | 13.8                           | 13.1  | 13.7 | 8.1   | 14.4   | 12.4    | 12.6    |
| SER                     | 60.4                           | 57.8  | 58.5 | 56.9  | 60.6   | 61.0    | 59.0    |
| THR                     | 82.6                           | 72.6  | 78.8 | 79.0  | 79.7   | 79.6    | 74.1    |
| VAL                     | 83.8                           | 73.9  | 80.4 | 81.6  | 79.1   | 78.6    | 74.4    |
| TRP                     | 43.8                           | 39.4  | 38.1 | 31.2  | 38.7   | 36.6    | 38.0    |
| TYR                     | 53.7                           | 53.7  | 50.2 | 51.0  | 50.3   | 48.9    | 52.1    |
| Total                   | 52.9                           | 47.5  | 49.7 | 49.1  | 50.1   | 49.0    | 48.2    |
| <b>Core residues</b>    |                                |       |      |       |        |         |         |
| CYS                     | 72.2                           | 63.3  | 67.3 | 65.8  | 68.1   | 67.7    | 59.4    |
| ASP                     | 38.7                           | 37.5  | 37.3 | 38.9  | 42.2   | 38.3    | 34.6    |
| GLU                     | 15.9                           | 14.7  | 16.5 | 16.2  | 18.6   | 16.2    | 16.2    |
| PHE                     | 50.8                           | 48.6  | 48.8 | 50.1  | 45.0   | 43.2    | 47.3    |
| HIS                     | 37.1                           | 36.9  | 35.2 | 34.1  | 36.9   | 31.4    | 33.3    |
| ILE                     | 56.5                           | 49.8  | 52.5 | 55.8  | 53.8   | 53.4    | 53.4    |
| LYS                     | 14.7                           | 15.6  | 14.7 | 15.6  | 17.6   | 16.6    | 18.6    |
| LEU                     | 63.3                           | 45.7  | 52.2 | 60.3  | 53.2   | 52.8    | 52.6    |
| MET                     | 22.0                           | 19.5  | 19.9 | 21.6  | 22.9   | 22.2    | 19.5    |
| ASN                     | 36.3                           | 32.1  | 34.5 | 31.2  | 34.1   | 33.6    | 31.9    |
| PRO                     | 72.6                           | 63.9  | 71.2 | 68.1  | 68.4   | 68.9    | 63.9    |
| GLN                     | 15.1                           | 11.5  | 15.1 | 12.8  | 16.4   | 15.1    | 13.5    |
| ARG                     | 12.9                           | 13.1  | 13.4 | 11.3  | 15.4   | 12.2    | 14.1    |
| SER                     | 56.1                           | 49.5  | 52.3 | 52.3  | 55.4   | 55.6    | 52.3    |
| THR                     | 78.1                           | 64.9  | 72.7 | 75.4  | 73.3   | 73.4    | 66.7    |
| VAL                     | 83.5                           | 71.0  | 79.4 | 80.2  | 78.5   | 77.6    | 71.9    |
| TRP                     | 44.4                           | 37.0  | 37.7 | 31.3  | 37.2   | 36.0    | 37.2    |
| TYR                     | 50.7                           | 50.4  | 46.5 | 49.0  | 46.0   | 46.6    | 49.2    |
| Total                   | 56.6                           | 48.3  | 52.0 | 54.0  | 52.5   | 51.7    | 50.1    |
| <b>Surface residues</b> |                                |       |      |       |        |         |         |
| CYS                     | 70.8                           | 63.1  | 64.6 | 61.5  | 64.6   | 66.2    | 67.7    |
| ASP                     | 52.4                           | 49.9  | 50.4 | 44.7  | 51.1   | 48.9    | 48.1    |
| GLU                     | 17.8                           | 17.6  | 17.2 | 14.1  | 16.6   | 16.8    | 16.6    |
| PHE                     | 59.4                           | 57.7  | 60.1 | 47.8  | 50.9   | 46.4    | 53.2    |
| HIS                     | 47.3                           | 46.1  | 42.9 | 39.8  | 39.8   | 38.9    | 40.1    |
| ILE                     | 63.9                           | 62.4  | 60.3 | 60.5  | 63.5   | 61.8    | 59.1    |
| LYS                     | 21.5                           | 20.4  | 19.7 | 18.0  | 19.1   | 18.4    | 20.6    |

|       |      |      |      |      |      |      |      |
|-------|------|------|------|------|------|------|------|
| LEU   | 69.1 | 64.0 | 66.2 | 63.4 | 66.5 | 65.0 | 64.2 |
| MET   | 19.5 | 21.5 | 22.6 | 21.0 | 17.9 | 15.9 | 15.4 |
| ASN   | 46.6 | 41.8 | 43.9 | 37.3 | 44.2 | 43.0 | 44.5 |
| PRO   | 73.1 | 70.6 | 72.7 | 72.0 | 71.9 | 71.3 | 70.8 |
| GLN   | 19.2 | 17.7 | 19.1 | 12.0 | 19.4 | 17.9 | 18.0 |
| ARG   | 16.0 | 13.3 | 15.6 | 6.8  | 13.3 | 11.9 | 12.0 |
| SER   | 61.9 | 61.7 | 61.4 | 57.7 | 63.5 | 64.0 | 60.6 |
| THR   | 87.2 | 80.9 | 83.5 | 83.8 | 86.4 | 85.7 | 81.6 |
| VAL   | 83.8 | 80.1 | 82.7 | 83.0 | 81.5 | 81.6 | 79.8 |
| TRP   | 45.3 | 42.2 | 41.4 | 26.6 | 41.4 | 41.4 | 39.8 |
| TYR   | 55.5 | 56.5 | 51.8 | 51.2 | 53.2 | 47.2 | 52.2 |
| Total | 49.7 | 47.3 | 48.1 | 44.5 | 48.0 | 47.0 | 46.6 |

**Table S20.** Protein side-chain packing results for 18 amino acid types in terms of  $\chi_{1-4}$  recovery rate on 379 perturbed backbones (RMSD = 2.95 Å) for the residues in three categories.

| Residue                 | $\chi_{1-4}$ recovery rate (%) |       |      |       |        |         |         |
|-------------------------|--------------------------------|-------|------|-------|--------|---------|---------|
|                         | FASPR                          | CISRR | RASP | SCATD | SCWRL4 | SCWRL4v | ABACUS2 |
| <b>All residues</b>     |                                |       |      |       |        |         |         |
| CYS                     | 69.2                           | 63.1  | 66.0 | 60.0  | 70.0   | 68.9    | 60.6    |
| ASP                     | 48.6                           | 44.6  | 47.0 | 43.6  | 48.1   | 47.5    | 44.8    |
| GLU                     | 18.5                           | 17.0  | 16.1 | 15.5  | 17.9   | 16.7    | 16.7    |
| PHE                     | 55.8                           | 51.3  | 53.5 | 52.0  | 48.9   | 45.9    | 48.4    |
| HIS                     | 42.4                           | 40.9  | 38.5 | 38.1  | 39.9   | 34.5    | 38.4    |
| ILE                     | 60.2                           | 53.3  | 55.0 | 57.3  | 57.0   | 55.5    | 55.2    |
| LYS                     | 22.4                           | 22.2  | 19.5 | 19.6  | 21.0   | 19.7    | 20.0    |
| LEU                     | 65.6                           | 51.0  | 56.3 | 62.8  | 56.9   | 57.0    | 56.3    |
| MET                     | 23.0                           | 20.3  | 22.3 | 18.7  | 20.5   | 20.3    | 18.3    |
| ASN                     | 42.8                           | 36.5  | 39.8 | 34.1  | 39.0   | 38.5    | 39.1    |
| PRO                     | 72.9                           | 65.3  | 71.0 | 68.6  | 69.5   | 68.6    | 66.6    |
| GLN                     | 19.7                           | 15.0  | 16.3 | 11.6  | 18.7   | 16.3    | 16.2    |
| ARG                     | 14.7                           | 12.2  | 13.2 | 9.5   | 14.3   | 13.0    | 13.3    |
| SER                     | 58.2                           | 56.2  | 57.4 | 56.3  | 59.5   | 60.0    | 55.4    |
| THR                     | 82.6                           | 71.7  | 78.9 | 80.2  | 79.8   | 79.4    | 74.0    |
| VAL                     | 83.2                           | 73.8  | 79.5 | 80.8  | 78.4   | 78.7    | 74.4    |
| TRP                     | 42.5                           | 37.8  | 35.4 | 27.1  | 35.3   | 34.7    | 37.4    |
| TYR                     | 52.8                           | 49.0  | 48.5 | 49.4  | 48.1   | 45.5    | 48.9    |
| Total                   | 53.0                           | 46.7  | 49.3 | 48.9  | 49.7   | 48.8    | 47.5    |
| <b>Core residues</b>    |                                |       |      |       |        |         |         |
| CYS                     | 69.6                           | 63.3  | 66.9 | 63.7  | 68.6   | 69.0    | 60.1    |
| ASP                     | 37.5                           | 33.6  | 36.5 | 36.0  | 38.3   | 39.9    | 32.0    |
| GLU                     | 16.2                           | 14.1  | 14.7 | 15.0  | 14.4   | 14.7    | 10.5    |
| PHE                     | 52.8                           | 47.6  | 49.3 | 49.9  | 46.3   | 43.2    | 45.7    |
| HIS                     | 36.9                           | 35.0  | 33.9 | 33.1  | 36.6   | 29.5    | 31.7    |
| ILE                     | 57.4                           | 49.4  | 51.9 | 56.1  | 54.8   | 52.6    | 52.5    |
| LYS                     | 20.5                           | 17.6  | 16.9 | 18.2  | 18.2   | 17.3    | 17.9    |
| LEU                     | 64.0                           | 46.1  | 53.3 | 62.1  | 54.0   | 54.4    | 53.3    |
| MET                     | 22.8                           | 17.4  | 22.9 | 18.7  | 21.6   | 20.7    | 19.5    |
| ASN                     | 36.3                           | 31.9  | 31.4 | 31.0  | 33.8   | 30.5    | 32.1    |
| PRO                     | 69.3                           | 58.3  | 64.1 | 61.8  | 61.5   | 60.8    | 62.0    |
| GLN                     | 20.1                           | 10.9  | 14.5 | 11.8  | 17.4   | 14.5    | 11.8    |
| ARG                     | 15.7                           | 12.9  | 12.9 | 13.6  | 15.2   | 14.1    | 15.4    |
| SER                     | 52.4                           | 46.9  | 51.5 | 51.7  | 53.6   | 55.2    | 48.1    |
| THR                     | 78.2                           | 64.3  | 73.8 | 75.9  | 74.5   | 74.7    | 67.1    |
| VAL                     | 82.6                           | 71.5  | 78.7 | 79.3  | 77.6   | 77.4    | 72.3    |
| TRP                     | 41.2                           | 36.5  | 34.7 | 31.3  | 35.2   | 36.2    | 36.0    |
| TYR                     | 50.7                           | 47.3  | 47.4 | 48.4  | 45.2   | 44.9    | 47.4    |
| Total                   | 56.6                           | 47.5  | 51.8 | 53.7  | 52.1   | 51.4    | 49.4    |
| <b>Surface residues</b> |                                |       |      |       |        |         |         |
| CYS                     | 69.2                           | 64.6  | 64.6 | 52.3  | 70.8   | 66.2    | 63.1    |
| ASP                     | 51.9                           | 49.0  | 49.9 | 46.1  | 51.4   | 50.2    | 49.0    |
| GLU                     | 18.3                           | 17.7  | 16.4 | 14.2  | 16.8   | 15.4    | 17.0    |
| PHE                     | 59.0                           | 51.2  | 57.0 | 48.1  | 49.8   | 46.8    | 52.2    |
| HIS                     | 47.3                           | 47.0  | 42.6 | 40.1  | 41.1   | 37.0    | 43.9    |
| ILE                     | 64.5                           | 60.8  | 58.9 | 62.4  | 61.2   | 61.6    | 59.7    |
| LYS                     | 23.2                           | 21.5  | 19.9 | 19.6  | 20.6   | 20.0    | 20.8    |

|       |      |      |      |      |      |      |      |
|-------|------|------|------|------|------|------|------|
| LEU   | 68.7 | 60.9 | 61.3 | 64.1 | 63.7 | 62.1 | 63.4 |
| MET   | 20.0 | 23.6 | 19.5 | 17.4 | 16.9 | 18.5 | 17.4 |
| ASN   | 46.9 | 39.7 | 43.6 | 37.0 | 41.6 | 41.8 | 44.4 |
| PRO   | 75.5 | 68.5 | 74.1 | 72.9 | 73.3 | 71.8 | 71.0 |
| GLN   | 19.4 | 16.5 | 15.6 | 11.3 | 18.0 | 15.9 | 15.9 |
| ARG   | 15.3 | 12.4 | 14.0 | 7.8  | 14.4 | 12.8 | 14.4 |
| SER   | 62.6 | 63.0 | 62.1 | 58.6 | 63.3 | 63.7 | 60.3 |
| THR   | 88.0 | 82.2 | 85.2 | 85.3 | 86.6 | 86.6 | 82.7 |
| VAL   | 83.3 | 78.4 | 81.5 | 82.1 | 80.7 | 80.4 | 79.1 |
| TRP   | 46.1 | 43.8 | 40.6 | 18.0 | 40.6 | 39.1 | 41.4 |
| TYR   | 54.5 | 49.5 | 49.8 | 48.2 | 50.5 | 45.8 | 48.2 |
| Total | 50.1 | 46.5 | 47.4 | 44.9 | 47.8 | 46.8 | 46.8 |

**Table S21.** Protein side-chain packing results for 18 amino acid types in terms of  $\chi_{1-4}$  recovery rate on 379 perturbed backbones (RMSD = 3.68 Å) for the residues in three categories.

| Residue                 | $\chi_{1-4}$ recovery rate (%) |       |      |       |        |         |         |
|-------------------------|--------------------------------|-------|------|-------|--------|---------|---------|
|                         | FASPR                          | CISRR | RASP | SCATD | SCWRL4 | SCWRL4v | ABACUS2 |
| <b>All residues</b>     |                                |       |      |       |        |         |         |
| CYS                     | 68.1                           | 63.7  | 66.4 | 60.4  | 68.8   | 66.7    | 56.4    |
| ASP                     | 47.7                           | 43.7  | 46.1 | 42.2  | 47.8   | 46.1    | 44.0    |
| GLU                     | 17.1                           | 16.7  | 16.7 | 15.3  | 17.1   | 16.6    | 16.3    |
| PHE                     | 50.0                           | 45.9  | 48.7 | 48.9  | 44.4   | 41.7    | 43.4    |
| HIS                     | 43.2                           | 40.0  | 37.7 | 35.9  | 38.2   | 35.7    | 37.0    |
| ILE                     | 56.5                           | 49.6  | 50.5 | 53.7  | 52.9   | 51.6    | 51.9    |
| LYS                     | 21.1                           | 21.0  | 19.0 | 19.0  | 20.5   | 19.7    | 18.7    |
| LEU                     | 63.1                           | 47.4  | 53.6 | 59.8  | 54.4   | 54.3    | 52.8    |
| MET                     | 21.6                           | 19.6  | 18.7 | 17.5  | 19.0   | 18.0    | 17.2    |
| ASN                     | 41.0                           | 36.3  | 38.7 | 33.5  | 38.4   | 36.9    | 37.3    |
| PRO                     | 71.1                           | 63.9  | 68.4 | 67.2  | 68.1   | 66.7    | 66.2    |
| GLN                     | 17.7                           | 14.3  | 15.9 | 11.7  | 19.2   | 17.2    | 15.7    |
| ARG                     | 12.5                           | 10.5  | 11.9 | 7.3   | 12.5   | 10.6    | 10.9    |
| SER                     | 58.3                           | 55.7  | 56.4 | 56.1  | 59.0   | 59.3    | 55.8    |
| THR                     | 79.8                           | 69.9  | 77.0 | 78.8  | 77.9   | 78.0    | 71.4    |
| VAL                     | 82.5                           | 71.5  | 78.2 | 78.7  | 77.3   | 76.9    | 71.8    |
| TRP                     | 39.2                           | 35.3  | 32.4 | 25.1  | 33.8   | 30.0    | 33.5    |
| TYR                     | 50.0                           | 49.0  | 44.4 | 46.8  | 45.0   | 42.1    | 46.2    |
| Total                   | 51.0                           | 44.9  | 47.3 | 47.2  | 48.0   | 46.9    | 45.4    |
| <b>Core residues</b>    |                                |       |      |       |        |         |         |
| CYS                     | 67.7                           | 63.3  | 64.8 | 62.2  | 67.3   | 65.8    | 54.4    |
| ASP                     | 37.9                           | 35.0  | 35.6 | 33.4  | 39.3   | 37.5    | 33.2    |
| GLU                     | 14.4                           | 12.3  | 15.9 | 14.7  | 14.4   | 13.8    | 13.2    |
| PHE                     | 48.0                           | 42.4  | 46.7 | 48.1  | 42.3   | 39.3    | 41.6    |
| HIS                     | 35.8                           | 32.5  | 33.1 | 29.3  | 33.9   | 31.2    | 32.0    |
| ILE                     | 53.6                           | 45.9  | 47.7 | 50.5  | 49.6   | 48.3    | 47.9    |
| LYS                     | 19.2                           | 17.9  | 16.9 | 17.9  | 17.9   | 17.6    | 14.3    |
| LEU                     | 59.7                           | 40.7  | 48.3 | 57.0  | 49.5   | 49.8    | 47.3    |
| MET                     | 19.9                           | 17.0  | 18.5 | 18.9  | 20.7   | 18.7    | 17.0    |
| ASN                     | 34.3                           | 30.1  | 29.4 | 29.0  | 27.4   | 26.8    | 27.7    |
| PRO                     | 68.9                           | 58.7  | 64.2 | 63.9  | 63.7   | 63.4    | 61.8    |
| GLN                     | 16.1                           | 11.2  | 14.1 | 9.9   | 16.1   | 13.8    | 13.2    |
| ARG                     | 12.4                           | 9.9   | 10.8 | 9.2   | 11.1   | 9.9     | 10.6    |
| SER                     | 53.8                           | 48.3  | 50.7 | 50.1  | 53.1   | 54.9    | 50.2    |
| THR                     | 71.4                           | 58.1  | 68.7 | 72.6  | 67.6   | 69.8    | 61.2    |
| VAL                     | 81.6                           | 69.0  | 77.2 | 77.3  | 75.9   | 75.8    | 69.3    |
| TRP                     | 37.2                           | 31.0  | 30.0 | 23.3  | 32.3   | 29.3    | 31.3    |
| TYR                     | 46.6                           | 44.4  | 40.7 | 41.9  | 40.7   | 38.5    | 42.1    |
| Total                   | 53.8                           | 44.6  | 48.7 | 50.4  | 49.0   | 48.3    | 45.9    |
| <b>Surface residues</b> |                                |       |      |       |        |         |         |
| CYS                     | 64.6                           | 66.2  | 61.5 | 52.3  | 63.1   | 63.1    | 56.9    |
| ASP                     | 51.4                           | 47.9  | 50.4 | 45.0  | 51.4   | 49.4    | 48.0    |
| GLU                     | 17.9                           | 16.8  | 16.1 | 14.4  | 16.4   | 15.6    | 16.7    |
| PHE                     | 59.4                           | 51.9  | 55.3 | 47.4  | 49.1   | 46.8    | 51.5    |
| HIS                     | 46.4                           | 46.4  | 41.7 | 38.6  | 41.4   | 39.2    | 36.1    |
| ILE                     | 62.4                           | 59.1  | 57.6 | 60.3  | 61.2   | 60.8    | 63.0    |
| LYS                     | 20.9                           | 21.3  | 19.8 | 18.6  | 20.4   | 19.9    | 20.3    |

|       |      |      |      |      |      |      |      |
|-------|------|------|------|------|------|------|------|
| LEU   | 67.0 | 61.5 | 65.1 | 63.7 | 64.8 | 63.2 | 64.0 |
| MET   | 22.1 | 20.0 | 20.0 | 17.4 | 14.4 | 15.4 | 17.4 |
| ASN   | 45.4 | 39.1 | 43.8 | 35.7 | 43.9 | 42.5 | 42.9 |
| PRO   | 73.1 | 68.7 | 71.1 | 70.9 | 71.7 | 69.3 | 69.0 |
| GLN   | 16.5 | 15.9 | 13.9 | 10.3 | 17.0 | 15.2 | 14.9 |
| ARG   | 13.9 | 10.7 | 13.6 | 6.2  | 13.5 | 12.0 | 12.6 |
| SER   | 62.1 | 61.9 | 61.5 | 59.2 | 63.3 | 63.6 | 59.3 |
| THR   | 85.5 | 80.4 | 83.3 | 84.9 | 84.6 | 84.4 | 79.7 |
| VAL   | 83.5 | 76.5 | 79.9 | 80.7 | 79.9 | 79.4 | 76.2 |
| TRP   | 46.1 | 43.0 | 34.4 | 21.1 | 37.5 | 34.4 | 38.3 |
| TYR   | 52.5 | 51.2 | 44.8 | 48.8 | 45.8 | 42.5 | 48.5 |
| Total | 48.8 | 45.7 | 46.7 | 44.2 | 47.3 | 46.2 | 45.5 |

**Table S22.** The total number of clashes in the repacked structures based on perturbed backbones.

| RMSD (Å) | #Clash in 379 structures repacked by different methods |       |       |       |        |         |         |
|----------|--------------------------------------------------------|-------|-------|-------|--------|---------|---------|
|          | FASPR                                                  | CISRR | RASP  | SCATD | SCWRL4 | SCWRL4v | ABACUS2 |
| 0.21     | 174                                                    | 74    | 872   | 1532  | 581    | 235     | 50      |
| 0.57     | 537                                                    | 231   | 1974  | 2834  | 1273   | 1019    | 211     |
| 0.93     | 1126                                                   | 739   | 3419  | 5126  | 2366   | 2369    | 753     |
| 1.48     | 4538                                                   | 2447  | 7750  | 9988  | 5747   | 6006    | 2508    |
| 1.88     | 5899                                                   | 3353  | 9269  | 12120 | 7450   | 7657    | 3474    |
| 2.38     | 7922                                                   | 4934  | 12602 | 15751 | 9870   | 10386   | 4933    |
| 2.55     | 9126                                                   | 5562  | 14241 | 17661 | 11519  | 11983   | 5798    |
| 2.74     | 9864                                                   | 6492  | 15383 | 18895 | 12547  | 13000   | 6711    |
| 2.95     | 10180                                                  | 6272  | 15269 | 19106 | 12588  | 13189   | 6562    |
| 3.68     | 13426                                                  | 8828  | 20418 | 24071 | 16868  | 17586   | 9239    |



**Table S23.** The number and the ratio of rotamers eliminated in different searching steps.

| PDB ID | #rotamer | Self-energy check |           | Goldstein DEE |           | Split DEE |           | Tree Decomposition |           |
|--------|----------|-------------------|-----------|---------------|-----------|-----------|-----------|--------------------|-----------|
|        |          | Number            | Ratio (%) | Number        | Ratio (%) | Number    | Ratio (%) | Number             | Ratio (%) |
| 1AHO   | 505      | 19                | 3.76      | 440           | 87.13     | 0         | 0.00      | 46                 | 9.11      |
| 1ATZ   | 1269     | 157               | 12.37     | 1006          | 79.28     | 8         | 0.63      | 98                 | 7.72      |
| 1B2P   | 893      | 93                | 10.41     | 699           | 78.28     | 56        | 6.27      | 45                 | 5.04      |
| 1B8Z   | 603      | 25                | 4.15      | 462           | 76.62     | 52        | 8.62      | 64                 | 10.61     |
| 1B9W   | 787      | 74                | 9.40      | 686           | 87.17     | 0         | 0.00      | 27                 | 3.43      |
| 1BGF   | 1299     | 85                | 6.54      | 934           | 71.90     | 171       | 13.16     | 109                | 8.39      |
| 1BYI   | 1522     | 198               | 13.01     | 1208          | 79.37     | 1         | 0.07      | 115                | 7.56      |
| 1C02   | 1556     | 100               | 6.43      | 1195          | 76.80     | 144       | 9.25      | 117                | 7.52      |
| 1C48   | 539      | 54                | 10.02     | 402           | 74.58     | 53        | 9.83      | 30                 | 5.57      |
| 1CEI   | 794      | 81                | 10.20     | 638           | 80.35     | 7         | 0.88      | 68                 | 8.56      |
| 1DPT   | 846      | 52                | 6.15      | 669           | 79.08     | 63        | 7.45      | 62                 | 7.33      |
| 1DQ0   | 1660     | 185               | 11.14     | 1315          | 79.22     | 45        | 2.71      | 115                | 6.93      |
| 1DV7   | 1758     | 178               | 10.13     | 1196          | 68.03     | 125       | 7.11      | 259                | 14.73     |
| 1DYS   | 2738     | 375               | 13.70     | 1999          | 73.01     | 102       | 3.73      | 262                | 9.57      |
| 1E5M   | 2847     | 346               | 12.15     | 2100          | 73.76     | 91        | 3.20      | 310                | 10.89     |
| 1E6F   | 910      | 129               | 14.18     | 724           | 79.56     | 0         | 0.00      | 57                 | 6.26      |
| 1EDQ   | 4072     | 604               | 14.83     | 2996          | 73.58     | 168       | 4.13      | 304                | 7.47      |
| 1ELK   | 1276     | 120               | 9.40      | 1085          | 85.03     | 24        | 1.88      | 47                 | 3.68      |
| 1ERZ   | 2573     | 307               | 11.93     | 1862          | 72.37     | 186       | 7.23      | 218                | 8.47      |
| 1ES5   | 1649     | 291               | 17.65     | 1276          | 77.38     | 21        | 1.27      | 61                 | 3.70      |
| 1ES9   | 1880     | 224               | 11.91     | 1468          | 78.09     | 55        | 2.93      | 133                | 7.07      |
| 1F41   | 818      | 93                | 11.37     | 618           | 75.55     | 79        | 9.66      | 28                 | 3.42      |
| 1F60   | 3605     | 435               | 12.07     | 2757          | 76.48     | 99        | 2.75      | 314                | 8.71      |
| 1F94   | 514      | 84                | 16.34     | 351           | 68.29     | 1         | 0.19      | 78                 | 15.18     |
| 1FCQ   | 3076     | 455               | 14.79     | 2040          | 66.32     | 177       | 5.75      | 404                | 13.13     |
| 1FO9   | 2970     | 504               | 16.97     | 1878          | 63.23     | 280       | 9.43      | 308                | 10.37     |
| 1FPO   | 1803     | 181               | 10.04     | 1311          | 72.71     | 112       | 6.21      | 199                | 11.04     |
| 1FTR   | 2304     | 313               | 13.59     | 1750          | 75.95     | 85        | 3.69      | 156                | 6.77      |
| 1FVK   | 1603     | 124               | 7.74      | 1268          | 79.10     | 118       | 7.36      | 93                 | 5.80      |
| 1G61   | 1590     | 172               | 10.82     | 1278          | 80.38     | 32        | 2.01      | 108                | 6.79      |
| 1G8A   | 2040     | 228               | 11.18     | 1494          | 73.24     | 83        | 4.07      | 235                | 11.52     |
| 1G8Q   | 735      | 59                | 8.03      | 647           | 88.03     | 3         | 0.41      | 26                 | 3.54      |
| 1GMU   | 1088     | 101               | 9.28      | 877           | 80.61     | 20        | 1.84      | 90                 | 8.27      |
| 1GO3   | 1501     | 118               | 7.86      | 1176          | 78.35     | 23        | 1.53      | 184                | 12.26     |
| 1GPP   | 1935     | 231               | 11.94     | 1341          | 69.30     | 188       | 9.72      | 175                | 9.04      |
| 1GQN   | 1948     | 192               | 9.86      | 1442          | 74.02     | 134       | 6.88      | 180                | 9.24      |
| 1GS9   | 1602     | 174               | 10.86     | 1065          | 66.48     | 211       | 13.17     | 152                | 9.49      |
| 1GSO   | 3067     | 382               | 12.46     | 2341          | 76.33     | 122       | 3.98      | 222                | 7.24      |
| 1GVP   | 701      | 51                | 7.28      | 575           | 82.03     | 17        | 2.43      | 58                 | 8.27      |
| 1GXN   | 2457     | 449               | 18.27     | 1780          | 72.45     | 59        | 2.40      | 169                | 6.88      |
| 1H03   | 910      | 81                | 8.90      | 763           | 83.85     | 4         | 0.44      | 62                 | 6.81      |
| 1H4A   | 1680     | 235               | 13.99     | 1251          | 74.46     | 57        | 3.39      | 137                | 8.15      |
| 1H4Y   | 982      | 78                | 7.94      | 741           | 75.46     | 91        | 9.27      | 72                 | 7.33      |
| 1HCL   | 2441     | 323               | 13.23     | 1838          | 75.30     | 78        | 3.20      | 202                | 8.28      |
| 1HM5   | 4711     | 619               | 13.14     | 3488          | 74.04     | 189       | 4.01      | 415                | 8.81      |
| 1HZ6   | 517      | 36                | 6.96      | 481           | 93.04     | 0         | 0.00      | 0                  | 0.00      |
| 1HZ9   | 586      | 57                | 9.73      | 465           | 79.35     | 0         | 0.00      | 64                 | 10.92     |
| 1I4J   | 963      | 59                | 6.13      | 791           | 82.14     | 39        | 4.05      | 74                 | 7.68      |

|      |      |     |       |      |       |     |       |     |       |
|------|------|-----|-------|------|-------|-----|-------|-----|-------|
| 1IGQ | 517  | 39  | 7.54  | 434  | 83.95 | 6   | 1.16  | 38  | 7.35  |
| 1IJQ | 2334 | 302 | 12.94 | 1853 | 79.39 | 58  | 2.49  | 121 | 5.18  |
| 1IJY | 1112 | 128 | 11.51 | 832  | 74.82 | 24  | 2.16  | 128 | 11.51 |
| 1ILK | 1549 | 80  | 5.16  | 1237 | 79.86 | 90  | 5.81  | 142 | 9.17  |
| 1IU8 | 1591 | 163 | 10.25 | 1261 | 79.26 | 57  | 3.58  | 110 | 6.91  |
| 1J23 | 1115 | 78  | 7.00  | 881  | 79.01 | 61  | 5.47  | 95  | 8.52  |
| 1J2A | 1314 | 135 | 10.27 | 1064 | 80.97 | 28  | 2.13  | 87  | 6.62  |
| 1J7G | 1257 | 139 | 11.06 | 1028 | 81.78 | 1   | 0.08  | 89  | 7.08  |
| 1JB3 | 1189 | 133 | 11.19 | 870  | 73.17 | 47  | 3.95  | 139 | 11.69 |
| 1JCD | 408  | 1   | 0.25  | 380  | 93.14 | 0   | 0.00  | 27  | 6.62  |
| 1JKS | 2569 | 305 | 11.87 | 1913 | 74.46 | 154 | 5.99  | 197 | 7.67  |
| 1JY2 | 400  | 9   | 2.25  | 373  | 93.25 | 0   | 0.00  | 18  | 4.50  |
| 1K33 | 687  | 30  | 4.37  | 561  | 81.66 | 4   | 0.58  | 92  | 13.39 |
| 1KMT | 1137 | 137 | 12.05 | 831  | 73.09 | 44  | 3.87  | 125 | 10.99 |
| 1KMZ | 961  | 120 | 12.49 | 753  | 78.36 | 25  | 2.60  | 63  | 6.56  |
| 1KN3 | 1524 | 245 | 16.08 | 1097 | 71.98 | 70  | 4.59  | 112 | 7.35  |
| 1KOE | 1351 | 180 | 13.32 | 980  | 72.54 | 49  | 3.63  | 142 | 10.51 |
| 1KPT | 822  | 143 | 17.40 | 635  | 77.25 | 5   | 0.61  | 39  | 4.74  |
| 1KU8 | 894  | 119 | 13.31 | 732  | 81.88 | 5   | 0.56  | 38  | 4.25  |
| 1KVA | 1405 | 129 | 9.18  | 1037 | 73.81 | 55  | 3.91  | 184 | 13.10 |
| 1KVE | 383  | 29  | 7.57  | 320  | 83.55 | 0   | 0.00  | 34  | 8.88  |
| 1KYF | 2198 | 178 | 8.10  | 1626 | 73.98 | 196 | 8.92  | 198 | 9.01  |
| 1KZQ | 1641 | 206 | 12.55 | 1371 | 83.55 | 4   | 0.24  | 60  | 3.66  |
| 1L3K | 1567 | 193 | 12.32 | 1188 | 75.81 | 47  | 3.00  | 139 | 8.87  |
| 1LBV | 2085 | 260 | 12.47 | 1412 | 67.72 | 104 | 4.99  | 309 | 14.82 |
| 1LM5 | 1585 | 210 | 13.25 | 1093 | 68.96 | 93  | 5.87  | 189 | 11.92 |
| 1LTU | 2256 | 327 | 14.49 | 1634 | 72.43 | 119 | 5.27  | 176 | 7.80  |
| 1M5T | 1104 | 76  | 6.88  | 923  | 83.61 | 0   | 0.00  | 105 | 9.51  |
| 1M6J | 2037 | 297 | 14.58 | 1547 | 75.95 | 11  | 0.54  | 182 | 8.93  |
| 1MD6 | 1144 | 94  | 8.22  | 991  | 86.63 | 15  | 1.31  | 44  | 3.85  |
| 1MF7 | 1855 | 179 | 9.65  | 1304 | 70.30 | 218 | 11.75 | 154 | 8.30  |
| 1MG7 | 3087 | 356 | 11.53 | 2335 | 75.64 | 164 | 5.31  | 232 | 7.52  |
| 1MIX | 2013 | 188 | 9.34  | 1518 | 75.41 | 128 | 6.36  | 179 | 8.89  |
| 1MKK | 905  | 47  | 5.19  | 647  | 71.49 | 51  | 5.64  | 160 | 17.68 |
| 1MML | 2092 | 274 | 13.10 | 1580 | 75.53 | 80  | 3.82  | 158 | 7.55  |
| 1MOL | 919  | 62  | 6.75  | 705  | 76.71 | 56  | 6.09  | 96  | 10.45 |
| 1NIJ | 787  | 56  | 7.12  | 639  | 81.19 | 4   | 0.51  | 88  | 11.18 |
| 1N93 | 2637 | 303 | 11.49 | 2085 | 79.07 | 42  | 1.59  | 207 | 7.85  |
| 1NAR | 2535 | 273 | 10.77 | 1911 | 75.38 | 125 | 4.93  | 226 | 8.92  |
| 1NM8 | 4984 | 541 | 10.85 | 3660 | 73.43 | 216 | 4.33  | 567 | 11.38 |
| 1NWA | 1471 | 212 | 14.41 | 1000 | 67.98 | 125 | 8.50  | 134 | 9.11  |
| 1NXM | 1747 | 197 | 11.28 | 1290 | 73.84 | 145 | 8.30  | 115 | 6.58  |
| 1OAI | 604  | 48  | 7.95  | 502  | 83.11 | 32  | 5.30  | 22  | 3.64  |
| 1OAQ | 931  | 102 | 10.96 | 586  | 62.94 | 127 | 13.64 | 116 | 12.46 |
| 1OGM | 4076 | 618 | 15.16 | 2848 | 69.87 | 243 | 5.96  | 367 | 9.00  |
| 1OK7 | 3139 | 313 | 9.97  | 2177 | 69.35 | 273 | 8.70  | 376 | 11.98 |
| 1PIX | 1862 | 209 | 11.22 | 1477 | 79.32 | 52  | 2.79  | 124 | 6.66  |
| 1P9H | 1022 | 89  | 8.71  | 871  | 85.23 | 1   | 0.10  | 61  | 5.97  |
| 1PCF | 693  | 46  | 6.64  | 612  | 88.31 | 0   | 0.00  | 35  | 5.05  |
| 1PDO | 993  | 84  | 8.46  | 838  | 84.39 | 49  | 4.93  | 22  | 2.22  |
| 1PE9 | 2565 | 302 | 11.77 | 2072 | 80.78 | 70  | 2.73  | 121 | 4.72  |
| 1PGV | 1642 | 150 | 9.14  | 1219 | 74.24 | 27  | 1.64  | 246 | 14.98 |
| 1PM4 | 949  | 64  | 6.74  | 665  | 70.07 | 57  | 6.01  | 163 | 17.18 |

|      |      |     |       |      |       |     |       |     |       |
|------|------|-----|-------|------|-------|-----|-------|-----|-------|
| 1PXZ | 2656 | 356 | 13.40 | 1941 | 73.08 | 191 | 7.19  | 168 | 6.33  |
| 1QAH | 848  | 114 | 13.44 | 689  | 81.25 | 1   | 0.12  | 44  | 5.19  |
| 1QKD | 533  | 83  | 15.57 | 406  | 76.17 | 1   | 0.19  | 43  | 8.07  |
| 1R12 | 2084 | 178 | 8.54  | 1732 | 83.11 | 11  | 0.53  | 163 | 7.82  |
| 1R29 | 1046 | 90  | 8.60  | 883  | 84.42 | 12  | 1.15  | 61  | 5.83  |
| 1R77 | 830  | 127 | 15.30 | 629  | 75.78 | 13  | 1.57  | 61  | 7.35  |
| 1R8N | 1433 | 175 | 12.21 | 1035 | 72.23 | 67  | 4.68  | 156 | 10.89 |
| 1RFY | 739  | 56  | 7.58  | 642  | 86.87 | 0   | 0.00  | 41  | 5.55  |
| 1RGX | 655  | 57  | 8.70  | 528  | 80.61 | 30  | 4.58  | 40  | 6.11  |
| 1RL0 | 2155 | 253 | 11.74 | 1513 | 70.21 | 103 | 4.78  | 286 | 13.27 |
| 1RWZ | 2017 | 200 | 9.92  | 1589 | 78.78 | 80  | 3.97  | 148 | 7.34  |
| 1RYL | 1444 | 167 | 11.57 | 1090 | 75.48 | 68  | 4.71  | 119 | 8.24  |
| 1RZ2 | 2144 | 248 | 11.57 | 1584 | 73.88 | 131 | 6.11  | 181 | 8.44  |
| 1S7I | 985  | 48  | 4.87  | 835  | 84.77 | 2   | 0.20  | 100 | 10.15 |
| 1S7K | 1456 | 119 | 8.17  | 1112 | 76.37 | 77  | 5.29  | 148 | 10.16 |
| 1SAU | 1094 | 98  | 8.96  | 853  | 77.97 | 63  | 5.76  | 80  | 7.31  |
| 1SH8 | 1369 | 118 | 8.62  | 885  | 64.65 | 93  | 6.79  | 273 | 19.94 |
| 1SMX | 771  | 49  | 6.36  | 644  | 83.53 | 9   | 1.17  | 69  | 8.95  |
| 1SNT | 2818 | 421 | 14.94 | 1988 | 70.55 | 127 | 4.51  | 282 | 10.01 |
| 1SQE | 1098 | 86  | 7.83  | 859  | 78.23 | 66  | 6.01  | 87  | 7.92  |
| 1SRV | 1139 | 122 | 10.71 | 839  | 73.66 | 10  | 0.88  | 168 | 14.75 |
| 1SUU | 2450 | 369 | 15.06 | 1864 | 76.08 | 69  | 2.82  | 148 | 6.04  |
| 1SWH | 723  | 78  | 10.79 | 572  | 79.11 | 22  | 3.04  | 51  | 7.05  |
| 1T1J | 1077 | 122 | 11.33 | 783  | 72.70 | 50  | 4.64  | 122 | 11.33 |
| 1TJE | 2013 | 200 | 9.94  | 1440 | 71.54 | 193 | 9.59  | 180 | 8.94  |
| 1TKS | 1650 | 209 | 12.67 | 1247 | 75.58 | 55  | 3.33  | 139 | 8.42  |
| 1TP6 | 1031 | 142 | 13.77 | 730  | 70.81 | 49  | 4.75  | 110 | 10.67 |
| 1TUA | 1859 | 209 | 11.24 | 1394 | 74.99 | 98  | 5.27  | 158 | 8.50  |
| 1TUO | 3230 | 478 | 14.80 | 2123 | 65.73 | 259 | 8.02  | 370 | 11.46 |
| 1TY0 | 1858 | 199 | 10.71 | 1410 | 75.89 | 60  | 3.23  | 189 | 10.17 |
| 1TZV | 1502 | 121 | 8.06  | 1036 | 68.97 | 173 | 11.52 | 172 | 11.45 |
| 1U07 | 843  | 45  | 5.34  | 653  | 77.46 | 10  | 1.19  | 135 | 16.01 |
| 1U2H | 943  | 68  | 7.21  | 649  | 68.82 | 112 | 11.88 | 114 | 12.09 |
| 1U5X | 1023 | 109 | 10.65 | 709  | 69.31 | 56  | 5.47  | 149 | 14.57 |
| 1UEB | 1482 | 158 | 10.66 | 1174 | 79.22 | 52  | 3.51  | 98  | 6.61  |
| 1UEK | 1920 | 185 | 9.64  | 1362 | 70.94 | 107 | 5.57  | 266 | 13.85 |
| 1UJN | 2347 | 261 | 11.12 | 1802 | 76.78 | 100 | 4.26  | 184 | 7.84  |
| 1UKF | 1547 | 212 | 13.70 | 1034 | 66.84 | 95  | 6.14  | 206 | 13.32 |
| 1ULN | 675  | 93  | 13.78 | 513  | 76.00 | 8   | 1.19  | 61  | 9.04  |
| 1ULR | 765  | 107 | 13.99 | 575  | 75.16 | 1   | 0.13  | 82  | 10.72 |
| 1UNP | 1280 | 111 | 8.67  | 848  | 66.25 | 132 | 10.31 | 189 | 14.77 |
| 1USM | 779  | 78  | 10.01 | 590  | 75.74 | 30  | 3.85  | 81  | 10.40 |
| 1UXZ | 944  | 115 | 12.18 | 717  | 75.95 | 22  | 2.33  | 90  | 9.53  |
| 1UZ3 | 940  | 98  | 10.43 | 744  | 79.15 | 32  | 3.40  | 66  | 7.02  |
| 1V05 | 674  | 62  | 9.20  | 583  | 86.50 | 0   | 0.00  | 29  | 4.30  |
| 1V0S | 3576 | 666 | 18.62 | 2446 | 68.40 | 172 | 4.81  | 292 | 8.17  |
| 1V6T | 2134 | 259 | 12.14 | 1576 | 73.85 | 63  | 2.95  | 236 | 11.06 |
| 1V7Q | 1376 | 223 | 16.21 | 924  | 67.15 | 89  | 6.47  | 140 | 10.17 |
| 1V8E | 1663 | 218 | 13.11 | 1297 | 77.99 | 14  | 0.84  | 134 | 8.06  |
| 1V8H | 870  | 46  | 5.29  | 704  | 80.92 | 22  | 2.53  | 98  | 11.26 |
| 1V8I | 1304 | 122 | 9.36  | 990  | 75.92 | 42  | 3.22  | 150 | 11.50 |
| 1VDK | 3756 | 529 | 14.08 | 2938 | 78.22 | 88  | 2.34  | 201 | 5.35  |
| 1VE2 | 1434 | 197 | 13.74 | 1074 | 74.90 | 3   | 0.21  | 160 | 11.16 |

|      |      |     |       |      |       |     |       |     |       |
|------|------|-----|-------|------|-------|-----|-------|-----|-------|
| 1VGT | 1571 | 200 | 12.73 | 1251 | 79.63 | 20  | 1.27  | 100 | 6.37  |
| 1VH5 | 1103 | 112 | 10.15 | 853  | 77.33 | 39  | 3.54  | 99  | 8.98  |
| 1VJS | 4038 | 665 | 16.47 | 2891 | 71.59 | 182 | 4.51  | 300 | 7.43  |
| 1VPI | 1022 | 149 | 14.58 | 826  | 80.82 | 0   | 0.00  | 47  | 4.60  |
| 1W5R | 2067 | 309 | 14.95 | 1538 | 74.41 | 38  | 1.84  | 182 | 8.81  |
| 1W7B | 2856 | 340 | 11.90 | 2148 | 75.21 | 122 | 4.27  | 246 | 8.61  |
| 1WBA | 1431 | 183 | 12.79 | 1041 | 72.75 | 98  | 6.85  | 109 | 7.62  |
| 1WD7 | 1991 | 235 | 11.80 | 1479 | 74.28 | 75  | 3.77  | 202 | 10.15 |
| 1WKA | 1311 | 161 | 12.28 | 967  | 73.76 | 49  | 3.74  | 134 | 10.22 |
| 1WKO | 1348 | 158 | 11.72 | 1028 | 76.26 | 43  | 3.19  | 119 | 8.83  |
| 1WLG | 2073 | 215 | 10.37 | 1722 | 83.07 | 0   | 0.00  | 136 | 6.56  |
| 1WLZ | 859  | 100 | 11.64 | 648  | 75.44 | 61  | 7.10  | 50  | 5.82  |
| 1WM3 | 745  | 43  | 5.77  | 596  | 80.00 | 47  | 6.31  | 59  | 7.92  |
| 1WMH | 820  | 98  | 11.95 | 622  | 75.85 | 37  | 4.51  | 63  | 7.68  |
| 1WQJ | 573  | 35  | 6.11  | 494  | 86.21 | 10  | 1.75  | 34  | 5.93  |
| 1WTJ | 2375 | 335 | 14.11 | 1814 | 76.38 | 44  | 1.85  | 182 | 7.66  |
| 1WU9 | 613  | 32  | 5.22  | 509  | 83.03 | 0   | 0.00  | 72  | 11.75 |
| 1WVH | 985  | 109 | 11.07 | 860  | 87.31 | 0   | 0.00  | 16  | 1.62  |
| 1WYC | 2877 | 480 | 16.68 | 1986 | 69.03 | 119 | 4.14  | 292 | 10.15 |
| 1WZ3 | 659  | 33  | 5.01  | 604  | 91.65 | 0   | 0.00  | 22  | 3.34  |
| 1X1E | 1757 | 235 | 13.38 | 1329 | 75.64 | 83  | 4.72  | 110 | 6.26  |
| 1X2I | 586  | 71  | 12.12 | 468  | 79.86 | 0   | 0.00  | 47  | 8.02  |
| 1X6I | 944  | 87  | 9.22  | 617  | 65.36 | 110 | 11.65 | 130 | 13.77 |
| 1XDZ | 2117 | 257 | 12.14 | 1612 | 76.15 | 57  | 2.69  | 191 | 9.02  |
| 1XFK | 2703 | 348 | 12.87 | 2099 | 77.65 | 21  | 0.78  | 235 | 8.69  |
| 1XS0 | 1011 | 94  | 9.30  | 866  | 85.66 | 20  | 1.98  | 31  | 3.07  |
| 1XXO | 1099 | 110 | 10.01 | 807  | 73.43 | 42  | 3.82  | 140 | 12.74 |
| 1Y2T | 1175 | 175 | 14.89 | 841  | 71.57 | 32  | 2.72  | 127 | 10.81 |
| 1Y7Y | 616  | 86  | 13.96 | 405  | 65.75 | 49  | 7.95  | 76  | 12.34 |
| 1YAC | 1535 | 218 | 14.20 | 1183 | 77.07 | 25  | 1.63  | 109 | 7.10  |
| 1YHH | 1965 | 184 | 9.36  | 1560 | 79.39 | 72  | 3.66  | 149 | 7.58  |
| 1YN3 | 807  | 68  | 8.43  | 612  | 75.84 | 63  | 7.81  | 64  | 7.93  |
| 1YPF | 2408 | 319 | 13.25 | 1796 | 74.58 | 86  | 3.57  | 207 | 8.60  |
| 1YT4 | 2120 | 359 | 16.93 | 1457 | 68.73 | 138 | 6.51  | 166 | 7.83  |
| 1YTL | 1322 | 129 | 9.76  | 995  | 75.26 | 66  | 4.99  | 132 | 9.98  |
| 1YU5 | 607  | 53  | 8.73  | 493  | 81.22 | 51  | 8.40  | 10  | 1.65  |
| 1YW5 | 1577 | 179 | 11.35 | 1240 | 78.63 | 41  | 2.60  | 117 | 7.42  |
| 1YXY | 1784 | 191 | 10.71 | 1418 | 79.48 | 77  | 4.32  | 98  | 5.49  |
| 1YZM | 542  | 10  | 1.85  | 523  | 96.49 | 0   | 0.00  | 9   | 1.66  |
| 1Z0C | 1525 | 176 | 11.54 | 1211 | 79.41 | 14  | 0.92  | 124 | 8.13  |
| 1Z0P | 805  | 75  | 9.32  | 627  | 77.89 | 4   | 0.50  | 99  | 12.30 |
| 1ZKR | 1157 | 142 | 12.27 | 958  | 82.80 | 16  | 1.38  | 41  | 3.54  |
| 1ZO2 | 1137 | 101 | 8.88  | 847  | 74.49 | 74  | 6.51  | 115 | 10.11 |
| 1ZRS | 2181 | 320 | 14.67 | 1517 | 69.56 | 134 | 6.14  | 210 | 9.63  |
| 1ZUH | 1426 | 107 | 7.50  | 1101 | 77.21 | 40  | 2.81  | 178 | 12.48 |
| 1ZV1 | 626  | 41  | 6.55  | 488  | 77.96 | 14  | 2.24  | 83  | 13.26 |
| 1ZVA | 588  | 28  | 4.76  | 540  | 91.84 | 11  | 1.87  | 9   | 1.53  |
| 1ZVT | 1895 | 229 | 12.08 | 1551 | 81.85 | 6   | 0.32  | 109 | 5.75  |
| 1ZXT | 571  | 39  | 6.83  | 483  | 84.59 | 0   | 0.00  | 49  | 8.58  |
| 2A35 | 1577 | 214 | 13.57 | 1089 | 69.06 | 73  | 4.63  | 201 | 12.75 |
| 2A6W | 1819 | 246 | 13.52 | 1132 | 62.23 | 258 | 14.18 | 183 | 10.06 |
| 2A8F | 529  | 61  | 11.53 | 438  | 82.80 | 9   | 1.70  | 21  | 3.97  |
| 2AHF | 3247 | 475 | 14.63 | 2272 | 69.97 | 168 | 5.17  | 332 | 10.22 |

|      |      |     |       |      |       |     |       |     |       |
|------|------|-----|-------|------|-------|-----|-------|-----|-------|
| 2AHN | 1379 | 192 | 13.92 | 1122 | 81.36 | 13  | 0.94  | 52  | 3.77  |
| 2B0A | 1473 | 115 | 7.81  | 1257 | 85.34 | 38  | 2.58  | 63  | 4.28  |
| 2B0J | 2553 | 296 | 11.59 | 2127 | 83.31 | 29  | 1.14  | 101 | 3.96  |
| 2B2F | 2096 | 337 | 16.08 | 1588 | 75.76 | 38  | 1.81  | 133 | 6.35  |
| 2BAY | 453  | 53  | 11.70 | 332  | 73.29 | 27  | 5.96  | 41  | 9.05  |
| 2BK8 | 862  | 69  | 8.00  | 733  | 85.03 | 3   | 0.35  | 57  | 6.61  |
| 2BPD | 1189 | 177 | 14.89 | 918  | 77.21 | 21  | 1.77  | 73  | 6.14  |
| 2BVP | 2562 | 269 | 10.50 | 1723 | 67.25 | 295 | 11.51 | 275 | 10.73 |
| 2CG7 | 719  | 65  | 9.04  | 557  | 77.47 | 19  | 2.64  | 78  | 10.85 |
| 2CGH | 1656 | 248 | 14.98 | 1232 | 74.40 | 13  | 0.79  | 163 | 9.84  |
| 2CHC | 1334 | 127 | 9.52  | 975  | 73.09 | 16  | 1.20  | 216 | 16.19 |
| 2CI3 | 2285 | 269 | 11.77 | 1731 | 75.75 | 117 | 5.12  | 168 | 7.35  |
| 2CIU | 1254 | 115 | 9.17  | 877  | 69.94 | 139 | 11.08 | 123 | 9.81  |
| 2COV | 860  | 78  | 9.07  | 624  | 72.56 | 36  | 4.19  | 122 | 14.19 |
| 2CWC | 2258 | 353 | 15.63 | 1483 | 65.68 | 201 | 8.90  | 221 | 9.79  |
| 2CWK | 1373 | 116 | 8.45  | 1133 | 82.52 | 21  | 1.53  | 103 | 7.50  |
| 2CWL | 2446 | 299 | 12.22 | 1779 | 72.73 | 142 | 5.81  | 226 | 9.24  |
| 2CWR | 682  | 80  | 11.73 | 582  | 85.34 | 0   | 0.00  | 20  | 2.93  |
| 2CYG | 2186 | 293 | 13.40 | 1749 | 80.01 | 7   | 0.32  | 137 | 6.27  |
| 2D4P | 1086 | 89  | 8.20  | 789  | 72.65 | 149 | 13.72 | 59  | 5.43  |
| 2D68 | 624  | 40  | 6.41  | 510  | 81.73 | 4   | 0.64  | 70  | 11.22 |
| 2D8E | 1035 | 93  | 8.99  | 772  | 74.59 | 38  | 3.67  | 132 | 12.75 |
| 2DQW | 2044 | 270 | 13.21 | 1424 | 69.67 | 67  | 3.28  | 283 | 13.85 |
| 2DYU | 2592 | 362 | 13.97 | 1961 | 75.66 | 76  | 2.93  | 193 | 7.45  |
| 2E01 | 3867 | 450 | 11.64 | 2785 | 72.02 | 223 | 5.77  | 409 | 10.58 |
| 2E10 | 1680 | 199 | 11.85 | 1273 | 75.77 | 111 | 6.61  | 97  | 5.77  |
| 2E3Z | 3844 | 579 | 15.06 | 2471 | 64.28 | 408 | 10.61 | 386 | 10.04 |
| 2E64 | 1780 | 193 | 10.84 | 1373 | 77.13 | 78  | 4.38  | 136 | 7.64  |
| 2E7A | 1170 | 127 | 10.85 | 928  | 79.32 | 13  | 1.11  | 102 | 8.72  |
| 2E8F | 1237 | 69  | 5.58  | 992  | 80.19 | 34  | 2.75  | 142 | 11.48 |
| 2E8G | 2117 | 246 | 11.62 | 1676 | 79.17 | 8   | 0.38  | 187 | 8.83  |
| 2E9Y | 2289 | 303 | 13.24 | 1685 | 73.61 | 89  | 3.89  | 212 | 9.26  |
| 2EBB | 970  | 90  | 9.28  | 725  | 74.74 | 53  | 5.46  | 102 | 10.52 |
| 2EBE | 849  | 73  | 8.60  | 718  | 84.57 | 29  | 3.42  | 29  | 3.42  |
| 2ECR | 1089 | 143 | 13.13 | 753  | 69.15 | 43  | 3.95  | 150 | 13.77 |
| 2EGJ | 1237 | 105 | 8.49  | 862  | 69.68 | 125 | 10.11 | 145 | 11.72 |
| 2EHG | 1258 | 112 | 8.90  | 999  | 79.41 | 17  | 1.35  | 130 | 10.33 |
| 2EPI | 880  | 54  | 6.14  | 738  | 83.86 | 10  | 1.14  | 78  | 8.86  |
| 2ETX | 1429 | 179 | 12.53 | 1089 | 76.21 | 15  | 1.05  | 146 | 10.22 |
| 2EX0 | 3609 | 419 | 11.61 | 2831 | 78.44 | 120 | 3.33  | 239 | 6.62  |
| 2F23 | 1396 | 115 | 8.24  | 1012 | 72.49 | 154 | 11.03 | 115 | 8.24  |
| 2F5G | 1228 | 73  | 5.94  | 906  | 73.78 | 58  | 4.72  | 191 | 15.55 |
| 2F6L | 1398 | 159 | 11.37 | 1044 | 74.68 | 70  | 5.01  | 125 | 8.94  |
| 2FBN | 1537 | 158 | 10.28 | 1292 | 84.06 | 0   | 0.00  | 87  | 5.66  |
| 2FBQ | 1827 | 153 | 8.37  | 1367 | 74.82 | 109 | 5.97  | 198 | 10.84 |
| 2FD5 | 1397 | 188 | 13.46 | 1047 | 74.95 | 32  | 2.29  | 130 | 9.31  |
| 2FHZ | 882  | 91  | 10.32 | 720  | 81.63 | 13  | 1.47  | 58  | 6.58  |
| 2FJZ | 523  | 64  | 12.24 | 425  | 81.26 | 6   | 1.15  | 28  | 5.35  |
| 2FL4 | 1514 | 121 | 7.99  | 1085 | 71.66 | 59  | 3.90  | 249 | 16.45 |
| 2FLU | 2107 | 413 | 19.60 | 1366 | 64.83 | 122 | 5.79  | 206 | 9.78  |
| 2FRG | 824  | 48  | 5.83  | 607  | 73.67 | 41  | 4.98  | 128 | 15.53 |
| 2FVH | 906  | 78  | 8.61  | 715  | 78.92 | 8   | 0.88  | 105 | 11.59 |
| 2FW7 | 934  | 81  | 8.67  | 784  | 83.94 | 22  | 2.36  | 47  | 5.03  |

|      |      |     |       |      |       |     |       |     |       |
|------|------|-----|-------|------|-------|-----|-------|-----|-------|
| 2G2U | 2131 | 358 | 16.80 | 1482 | 69.54 | 159 | 7.46  | 132 | 6.19  |
| 2G30 | 2021 | 160 | 7.92  | 1614 | 79.86 | 110 | 5.44  | 137 | 6.78  |
| 2G40 | 1173 | 138 | 11.76 | 943  | 80.39 | 19  | 1.62  | 73  | 6.22  |
| 2G69 | 749  | 37  | 4.94  | 612  | 81.71 | 48  | 6.41  | 52  | 6.94  |
| 2G7I | 1084 | 101 | 9.32  | 876  | 80.81 | 26  | 2.40  | 81  | 7.47  |
| 2G7O | 664  | 32  | 4.82  | 600  | 90.36 | 1   | 0.15  | 31  | 4.67  |
| 2GAS | 2580 | 293 | 11.36 | 1944 | 75.35 | 90  | 3.49  | 253 | 9.81  |
| 2GDQ | 3113 | 425 | 13.65 | 2067 | 66.40 | 253 | 8.13  | 368 | 11.82 |
| 2GEC | 1233 | 160 | 12.98 | 942  | 76.40 | 14  | 1.14  | 117 | 9.49  |
| 2GGV | 401  | 20  | 4.99  | 320  | 79.80 | 0   | 0.00  | 61  | 15.21 |
| 2GIY | 1314 | 153 | 11.64 | 1032 | 78.54 | 24  | 1.83  | 105 | 7.99  |
| 2GKG | 956  | 107 | 11.19 | 736  | 76.99 | 17  | 1.78  | 96  | 10.04 |
| 2GKV | 885  | 154 | 17.40 | 717  | 81.02 | 0   | 0.00  | 14  | 1.58  |
| 2GOM | 691  | 51  | 7.38  | 602  | 87.12 | 0   | 0.00  | 38  | 5.50  |
| 2GQV | 467  | 55  | 11.78 | 324  | 69.38 | 82  | 17.56 | 6   | 1.28  |
| 2GXG | 1351 | 78  | 5.77  | 1133 | 83.86 | 31  | 2.29  | 109 | 8.07  |
| 2H14 | 2241 | 373 | 16.64 | 1715 | 76.53 | 33  | 1.47  | 120 | 5.35  |
| 2H2R | 1190 | 169 | 14.20 | 789  | 66.30 | 103 | 8.66  | 129 | 10.84 |
| 2H2Z | 2274 | 248 | 10.91 | 1749 | 76.91 | 151 | 6.64  | 126 | 5.54  |
| 2H7W | 831  | 74  | 8.90  | 680  | 81.83 | 40  | 4.81  | 37  | 4.45  |
| 2H7Z | 586  | 67  | 11.43 | 473  | 80.72 | 1   | 0.17  | 45  | 7.68  |
| 2H8E | 1098 | 89  | 8.11  | 807  | 73.50 | 57  | 5.19  | 145 | 13.21 |
| 2H8O | 2200 | 289 | 13.14 | 1641 | 74.59 | 99  | 4.50  | 171 | 7.77  |
| 2HC8 | 803  | 65  | 8.09  | 730  | 90.91 | 0   | 0.00  | 8   | 1.00  |
| 2HLR | 497  | 71  | 14.29 | 389  | 78.27 | 1   | 0.20  | 36  | 7.24  |
| 2HLY | 1589 | 214 | 13.47 | 1185 | 74.58 | 51  | 3.21  | 139 | 8.75  |
| 2HOQ | 2196 | 237 | 10.79 | 1580 | 71.95 | 85  | 3.87  | 294 | 13.39 |
| 2HPL | 878  | 84  | 9.57  | 716  | 81.55 | 0   | 0.00  | 78  | 8.88  |
| 2HWW | 1374 | 142 | 10.33 | 1067 | 77.66 | 54  | 3.93  | 111 | 8.08  |
| 2HY5 | 1200 | 125 | 10.42 | 888  | 74.00 | 58  | 4.83  | 129 | 10.75 |
| 2HZF | 950  | 100 | 10.53 | 762  | 80.21 | 24  | 2.53  | 64  | 6.74  |
| 2I3F | 1865 | 269 | 14.42 | 1418 | 76.03 | 38  | 2.04  | 140 | 7.51  |
| 2I49 | 3145 | 466 | 14.82 | 2134 | 67.85 | 250 | 7.95  | 295 | 9.38  |
| 2I5D | 1622 | 168 | 10.36 | 1237 | 76.26 | 83  | 5.12  | 134 | 8.26  |
| 2I6V | 822  | 58  | 7.06  | 623  | 75.79 | 32  | 3.89  | 109 | 13.26 |
| 2IBL | 870  | 58  | 6.67  | 764  | 87.82 | 25  | 2.87  | 23  | 2.64  |
| 2IC6 | 690  | 52  | 7.54  | 568  | 82.32 | 1   | 0.14  | 69  | 10.00 |
| 2IC7 | 1512 | 146 | 9.66  | 1125 | 74.40 | 128 | 8.47  | 113 | 7.47  |
| 2IIA | 665  | 51  | 7.67  | 593  | 89.17 | 0   | 0.00  | 21  | 3.16  |
| 2IJK | 582  | 55  | 9.45  | 497  | 85.40 | 2   | 0.34  | 28  | 4.81  |
| 2IP2 | 2536 | 271 | 10.69 | 1850 | 72.95 | 173 | 6.82  | 242 | 9.54  |
| 2IPR | 1095 | 124 | 11.32 | 885  | 80.82 | 12  | 1.10  | 74  | 6.76  |
| 2IRU | 2077 | 334 | 16.08 | 1467 | 70.63 | 81  | 3.90  | 195 | 9.39  |
| 2IUM | 1255 | 180 | 14.34 | 1020 | 81.27 | 10  | 0.80  | 45  | 3.59  |
| 2IXM | 2570 | 358 | 13.93 | 1911 | 74.36 | 131 | 5.10  | 170 | 6.61  |
| 2IY9 | 2111 | 367 | 17.39 | 1547 | 73.28 | 59  | 2.79  | 138 | 6.54  |
| 2IZ6 | 938  | 114 | 12.15 | 797  | 84.97 | 0   | 0.00  | 27  | 2.88  |
| 2J2J | 1327 | 219 | 16.50 | 1009 | 76.04 | 22  | 1.66  | 77  | 5.80  |
| 2J5Y | 481  | 43  | 8.94  | 409  | 85.03 | 0   | 0.00  | 29  | 6.03  |
| 2J6B | 954  | 79  | 8.28  | 810  | 84.91 | 3   | 0.31  | 62  | 6.50  |
| 2J7I | 958  | 114 | 11.90 | 667  | 69.62 | 26  | 2.71  | 151 | 15.76 |
| 2J8B | 722  | 91  | 12.60 | 588  | 81.44 | 29  | 4.02  | 14  | 1.94  |
| 2J9W | 997  | 86  | 8.63  | 715  | 71.72 | 74  | 7.42  | 122 | 12.24 |

|      |      |     |       |      |       |     |       |     |       |
|------|------|-----|-------|------|-------|-----|-------|-----|-------|
| 2JCP | 1211 | 185 | 15.28 | 976  | 80.59 | 4   | 0.33  | 46  | 3.80  |
| 2NML | 1000 | 62  | 6.20  | 833  | 83.30 | 33  | 3.30  | 72  | 7.20  |
| 2NNU | 1831 | 208 | 11.36 | 1466 | 80.07 | 75  | 4.10  | 82  | 4.48  |
| 2NPT | 861  | 72  | 8.36  | 637  | 73.98 | 49  | 5.69  | 103 | 11.96 |
| 2NRR | 1237 | 97  | 7.84  | 785  | 63.46 | 142 | 11.48 | 213 | 17.22 |
| 2NV0 | 1597 | 190 | 11.90 | 1237 | 77.46 | 57  | 3.57  | 113 | 7.08  |
| 2O0Q | 910  | 103 | 11.32 | 630  | 69.23 | 75  | 8.24  | 102 | 11.21 |
| 2O2K | 2966 | 347 | 11.70 | 2107 | 71.04 | 269 | 9.07  | 243 | 8.19  |
| 2O6S | 1473 | 168 | 11.41 | 1196 | 81.19 | 14  | 0.95  | 95  | 6.45  |
| 2O6X | 2681 | 401 | 14.96 | 1970 | 73.48 | 135 | 5.04  | 175 | 6.53  |
| 2OEB | 1280 | 148 | 11.56 | 988  | 77.19 | 60  | 4.69  | 84  | 6.56  |
| 2OHW | 1184 | 105 | 8.87  | 984  | 83.11 | 14  | 1.18  | 81  | 6.84  |
| 2OIX | 1510 | 144 | 9.54  | 1050 | 69.54 | 127 | 8.41  | 189 | 12.52 |
| 2OL7 | 1774 | 170 | 9.58  | 1491 | 84.05 | 38  | 2.14  | 75  | 4.23  |
| 2OSA | 1701 | 252 | 14.81 | 1216 | 71.49 | 36  | 2.12  | 197 | 11.58 |
| 2OTU | 826  | 111 | 13.44 | 647  | 78.33 | 18  | 2.18  | 50  | 6.05  |
| 2P1G | 1918 | 192 | 10.01 | 1518 | 79.14 | 121 | 6.31  | 87  | 4.54  |
| 2P38 | 1429 | 141 | 9.87  | 1047 | 73.27 | 77  | 5.39  | 164 | 11.48 |
| 2P4H | 2324 | 249 | 10.71 | 1849 | 79.56 | 71  | 3.06  | 155 | 6.67  |
| 2P52 | 1660 | 242 | 14.58 | 1147 | 69.10 | 112 | 6.75  | 159 | 9.58  |
| 2P5D | 1451 | 153 | 10.54 | 1081 | 74.50 | 104 | 7.17  | 113 | 7.79  |
| 2P5K | 654  | 46  | 7.03  | 504  | 77.06 | 65  | 9.94  | 39  | 5.96  |
| 2P65 | 1539 | 189 | 12.28 | 1224 | 79.53 | 39  | 2.53  | 87  | 5.65  |
| 2P84 | 1313 | 113 | 8.61  | 903  | 68.77 | 139 | 10.59 | 158 | 12.03 |
| 2PBP | 2198 | 232 | 10.56 | 1622 | 73.79 | 63  | 2.87  | 281 | 12.78 |
| 2PBQ | 1234 | 125 | 10.13 | 997  | 80.79 | 6   | 0.49  | 106 | 8.59  |
| 2PEF | 3073 | 305 | 9.93  | 2420 | 78.75 | 82  | 2.67  | 266 | 8.66  |
| 2PET | 1887 | 148 | 7.84  | 1360 | 72.07 | 201 | 10.65 | 178 | 9.43  |
| 2PGE | 2958 | 335 | 11.33 | 2105 | 71.16 | 286 | 9.67  | 232 | 7.84  |
| 2PKF | 2294 | 244 | 10.64 | 1554 | 67.74 | 226 | 9.85  | 270 | 11.77 |
| 2PMR | 756  | 71  | 9.39  | 566  | 74.87 | 42  | 5.56  | 77  | 10.19 |
| 2PND | 1134 | 92  | 8.11  | 870  | 76.72 | 52  | 4.59  | 120 | 10.58 |
| 2PST | 642  | 74  | 11.53 | 517  | 80.53 | 11  | 1.71  | 40  | 6.23  |
| 2PTV | 938  | 61  | 6.50  | 665  | 70.90 | 79  | 8.42  | 133 | 14.18 |
| 2PV2 | 848  | 45  | 5.31  | 646  | 76.18 | 49  | 5.78  | 108 | 12.74 |
| 2Q8O | 1031 | 73  | 7.08  | 908  | 88.07 | 10  | 0.97  | 40  | 3.88  |
| 2QIY | 1131 | 107 | 9.46  | 878  | 77.63 | 26  | 2.30  | 120 | 10.61 |
| 2QOL | 2308 | 344 | 14.90 | 1742 | 75.48 | 60  | 2.60  | 162 | 7.02  |
| 2QPW | 1278 | 139 | 10.88 | 978  | 76.53 | 50  | 3.91  | 111 | 8.69  |
| 2QR3 | 949  | 70  | 7.38  | 829  | 87.36 | 0   | 0.00  | 50  | 5.27  |
| 2QT4 | 698  | 132 | 18.91 | 531  | 76.07 | 0   | 0.00  | 35  | 5.01  |
| 2R6U | 910  | 115 | 12.64 | 768  | 84.40 | 17  | 1.87  | 10  | 1.10  |
| 2R77 | 1623 | 216 | 13.31 | 1233 | 75.97 | 72  | 4.44  | 102 | 6.28  |
| 2R99 | 1373 | 155 | 11.29 | 1118 | 81.43 | 33  | 2.40  | 67  | 4.88  |
| 2RCZ | 721  | 42  | 5.83  | 628  | 87.10 | 2   | 0.28  | 49  | 6.80  |
| 2RFA | 1776 | 183 | 10.30 | 1381 | 77.76 | 94  | 5.29  | 118 | 6.64  |
| 2RIK | 2277 | 169 | 7.42  | 1866 | 81.95 | 111 | 4.87  | 131 | 5.75  |
| 2RJD | 2732 | 358 | 13.10 | 2077 | 76.02 | 129 | 4.72  | 168 | 6.15  |
| 2RK5 | 763  | 65  | 8.52  | 627  | 82.18 | 22  | 2.88  | 49  | 6.42  |
| 2VC8 | 492  | 29  | 5.89  | 456  | 92.68 | 7   | 1.42  | 0   | 0.00  |
| 2YXF | 978  | 71  | 7.26  | 798  | 81.60 | 5   | 0.51  | 104 | 10.63 |
| 2YYV | 1754 | 216 | 12.31 | 1353 | 77.14 | 28  | 1.60  | 157 | 8.95  |
| 2YZI | 869  | 77  | 8.86  | 720  | 82.85 | 31  | 3.57  | 41  | 4.72  |

|       |        |       |       |        |       |       |       |       |       |
|-------|--------|-------|-------|--------|-------|-------|-------|-------|-------|
| 2Z14  | 1079   | 82    | 7.60  | 842    | 78.04 | 67    | 6.21  | 88    | 8.16  |
| 2Z1E  | 2253   | 236   | 10.47 | 1800   | 79.89 | 35    | 1.55  | 182   | 8.08  |
| 2Z37  | 1838   | 329   | 17.90 | 1241   | 67.52 | 111   | 6.04  | 157   | 8.54  |
| 2ZFY  | 2141   | 219   | 10.23 | 1654   | 77.25 | 54    | 2.52  | 214   | 10.00 |
| 3ADO  | 2595   | 230   | 8.86  | 2143   | 82.58 | 52    | 2.00  | 170   | 6.55  |
| 3BB7  | 2285   | 316   | 13.83 | 1806   | 79.04 | 59    | 2.58  | 104   | 4.55  |
| 3BN6  | 1342   | 259   | 19.30 | 885    | 65.95 | 45    | 3.35  | 153   | 11.40 |
| 3C4S  | 445    | 21    | 4.72  | 378    | 84.94 | 2     | 0.45  | 44    | 9.89  |
| 3PHS  | 2006   | 182   | 9.07  | 1601   | 79.81 | 39    | 1.94  | 184   | 9.17  |
| 3SSW  | 983    | 50    | 5.09  | 718    | 73.04 | 132   | 13.43 | 83    | 8.44  |
| 4RWU  | 741    | 88    | 11.88 | 610    | 82.32 | 0     | 0.00  | 43    | 5.80  |
| 5WOF  | 769    | 79    | 10.27 | 605    | 78.67 | 8     | 1.04  | 77    | 10.01 |
| 6XIA  | 3234   | 444   | 13.73 | 2385   | 73.75 | 84    | 2.60  | 321   | 9.93  |
| Total | 572783 | 66178 | 11.55 | 433156 | 75.62 | 24346 | 4.25  | 49103 | 8.57  |
| Avg.  | -      | -     | 10.76 | -      | 76.97 | -     | 3.86  | -     | 8.41  |
| Std.  | -      | -     | 3.19  | -      | 5.92  | -     | 3.23  | -     | 3.25  |

**Note:** Avg. stands for average; Std. stands for standard deviation.



## Supporting Figures

**Figure S1.** FASPR computational time (in seconds) for side-chain packing as a function of number of rotamers (A) or number of residues (B).

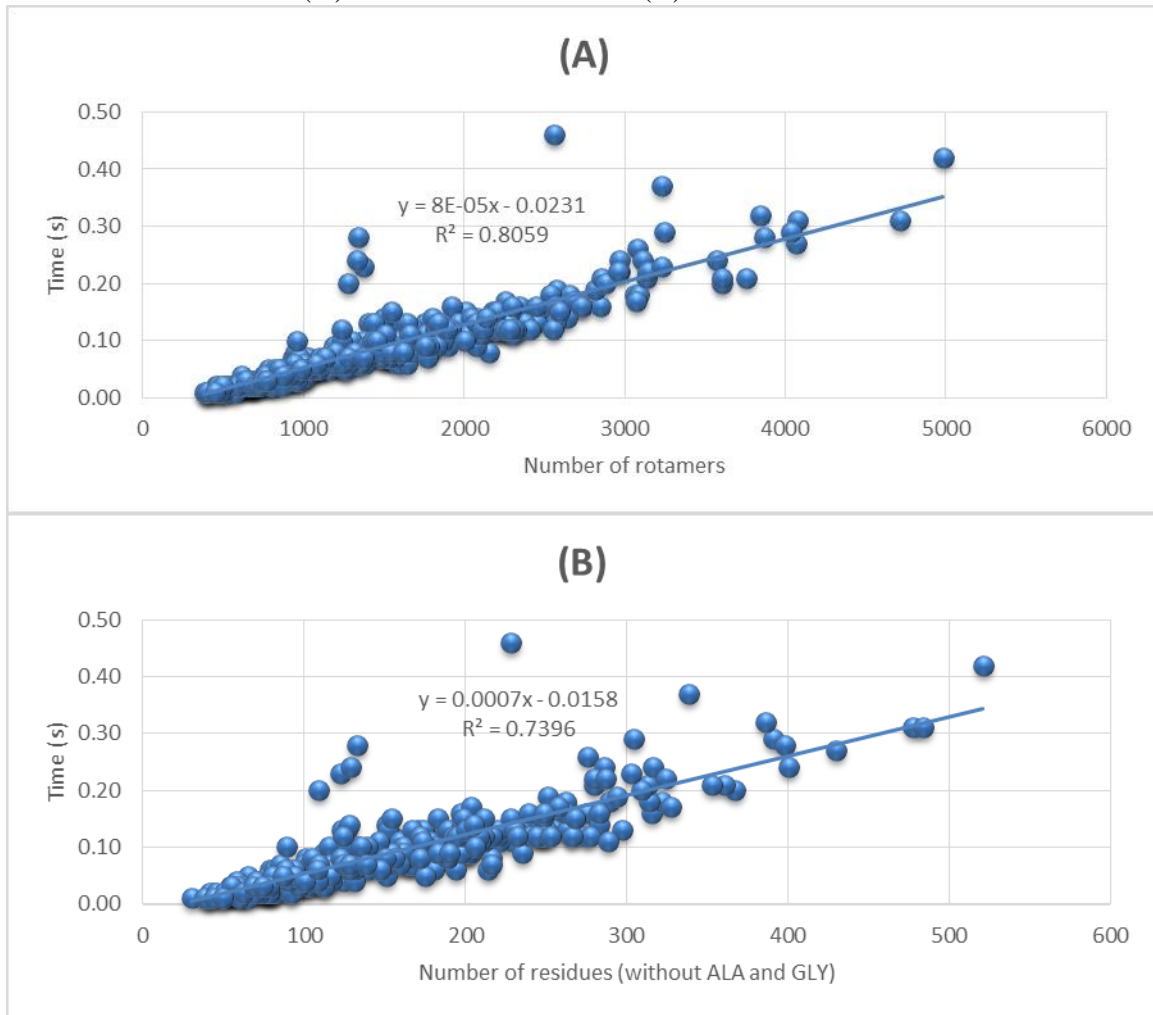

**Figure S2.** The accuracy of FASPR in terms of  $\chi_{1-4}$  recovery rate (A) or RMSD (B) as a function of number of residues.

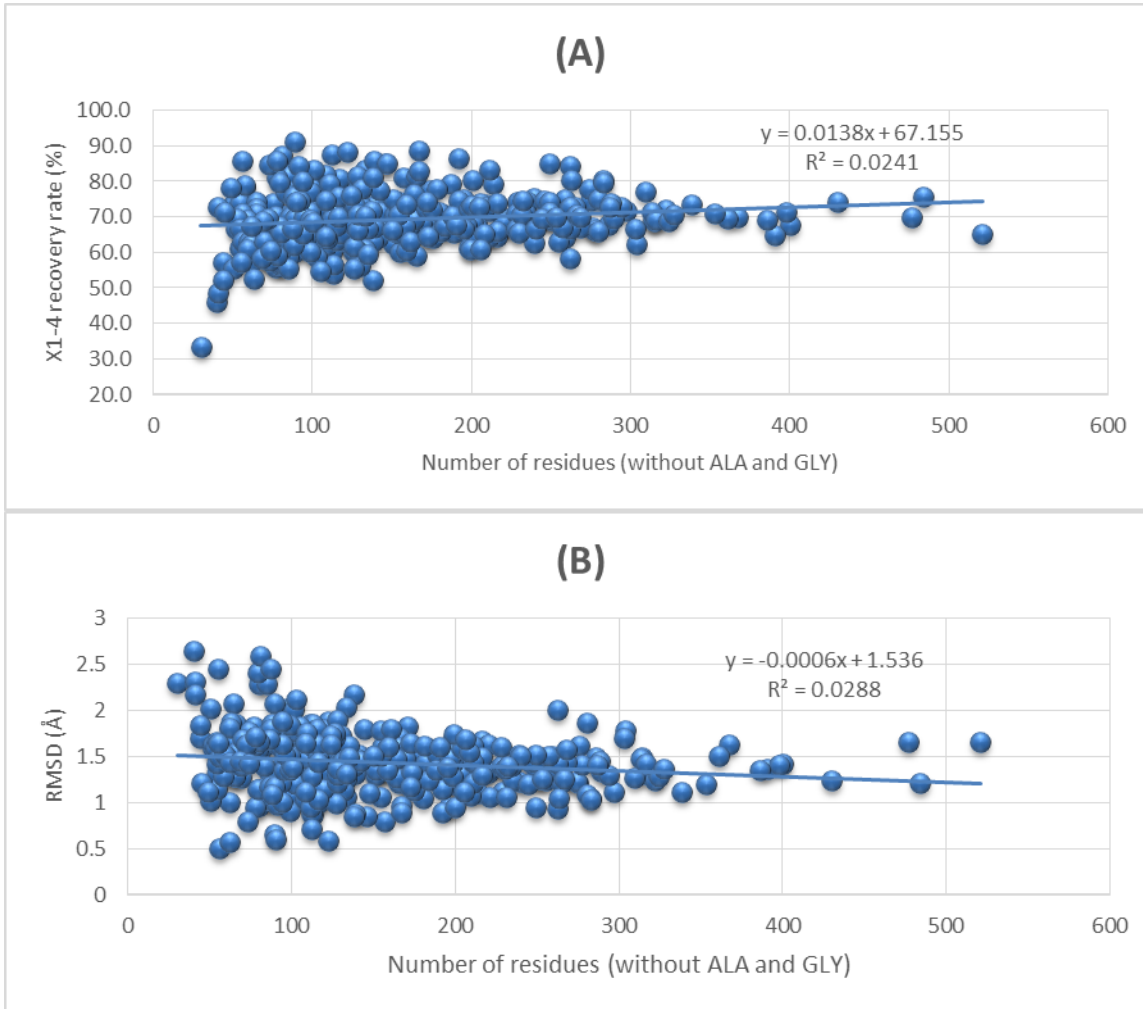

Supplement: btaa234_supplementary_data.pdf [file btaa234_supplementary_data.pdf]
